# Supplementary material
Source: PubMed Central journal article supplement (PMC5733270)
Supplement: ml7b00239_si_002.pdf [file ml7b00239_si_002.pdf]

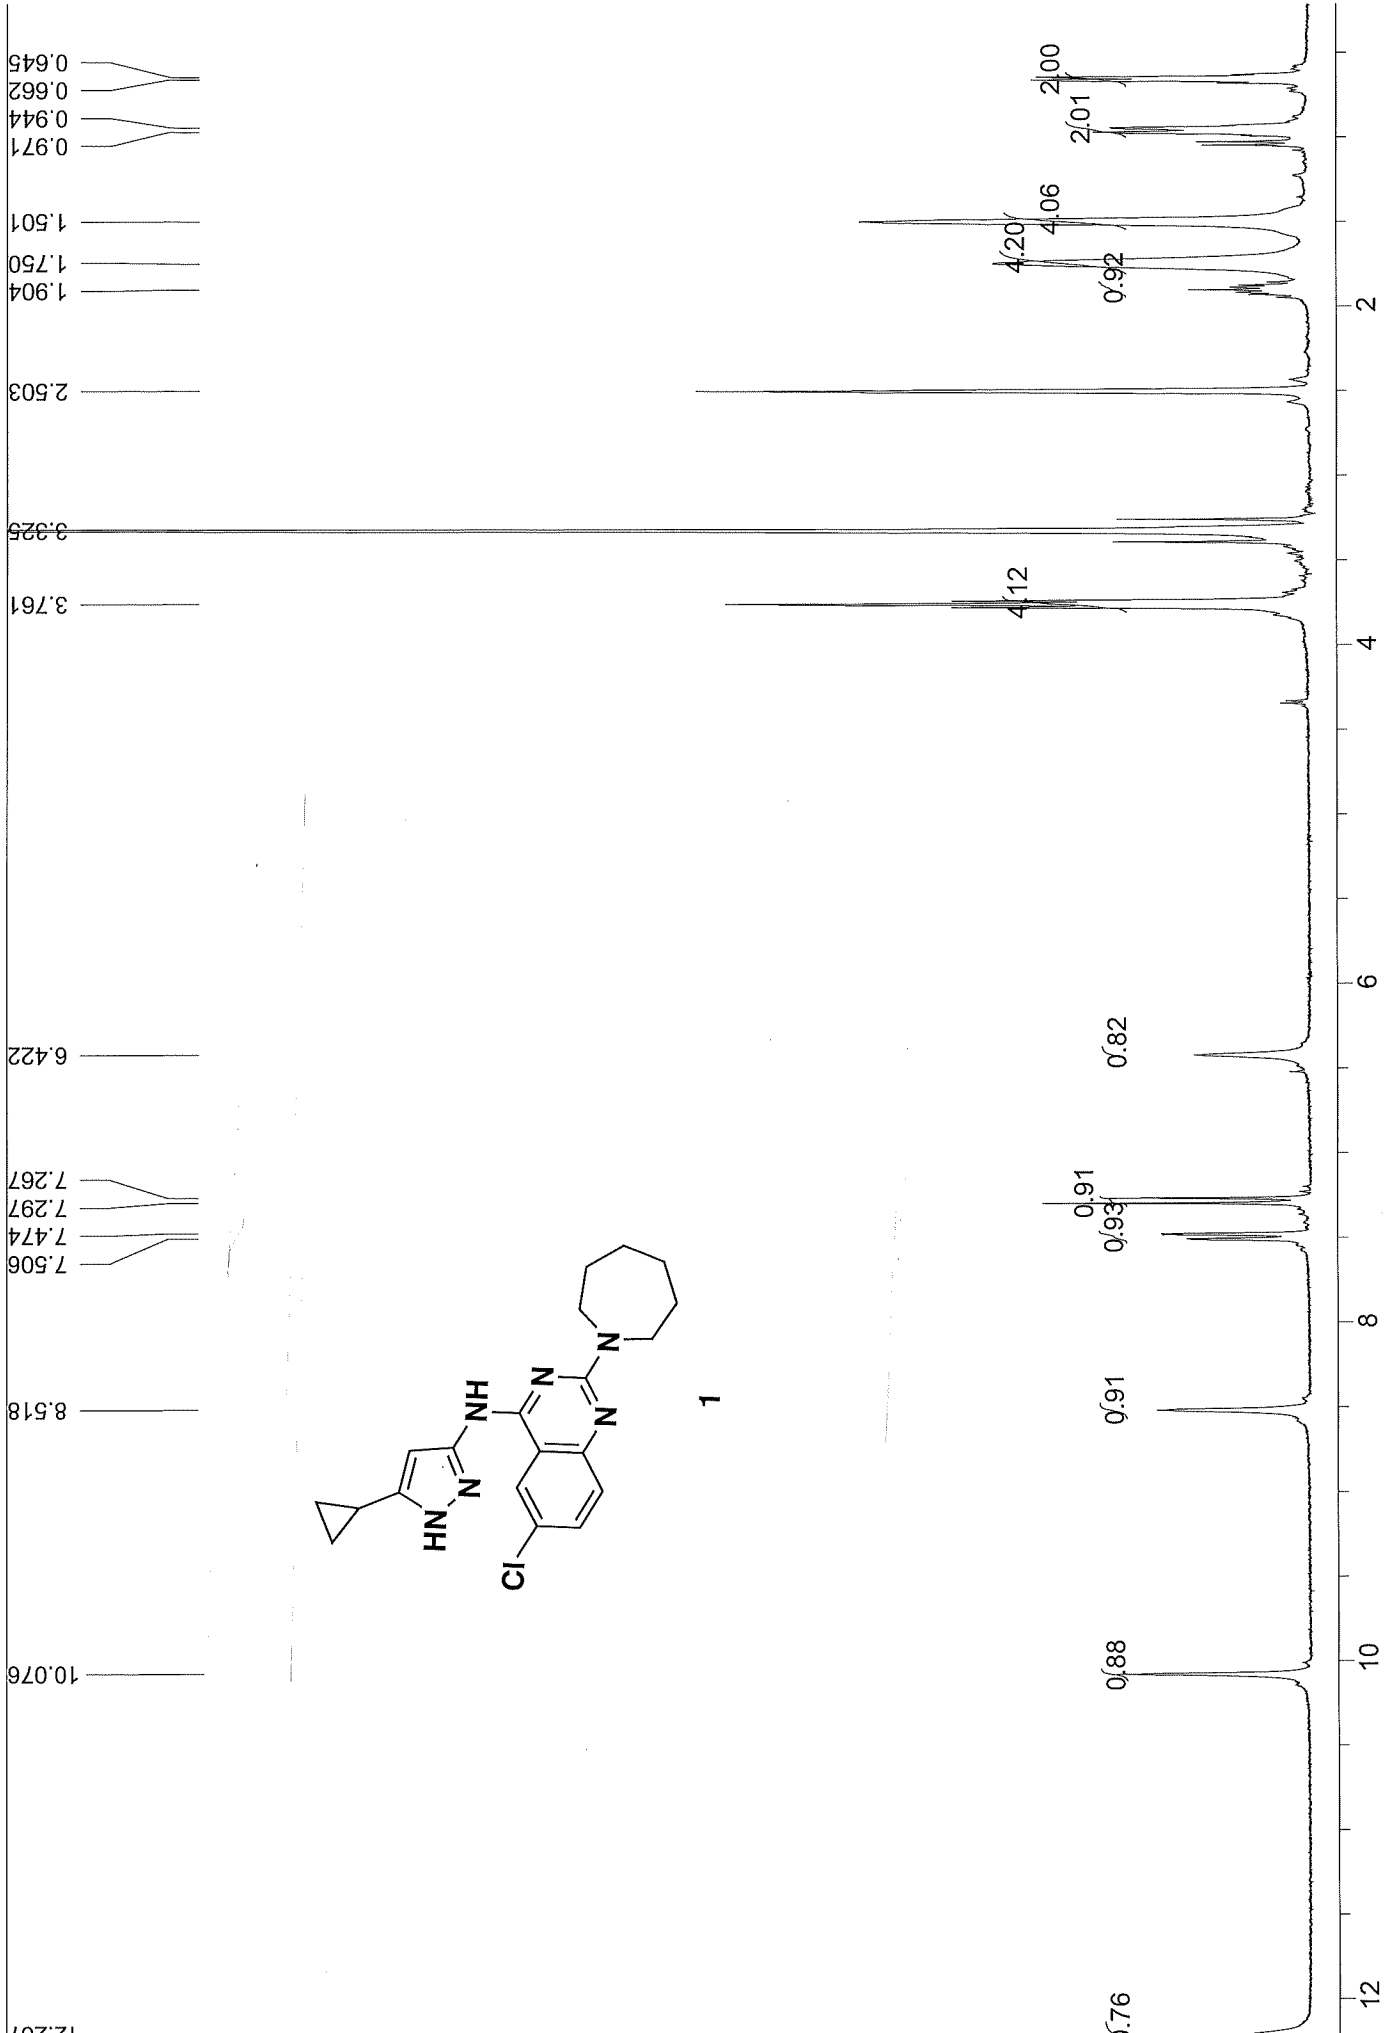

USER: -- DATE: Mar 12 2007  
 PTSD: 16384  
 OF1: 1789.1  
 NA: 16  
 SW1: 7987  
 PW: 8.0 usec  
 PD: 1.0 sec  
 LB: 0.0  
 Nuts - \$CP-ZF-741-05-C-H1-DM50+D20-070

1.497  
1.736

3.619  
3.776

7.383  
7.413  
7.619  
7.625  
7.648  
7.656

8.561  
8.799

10.091  
10.599

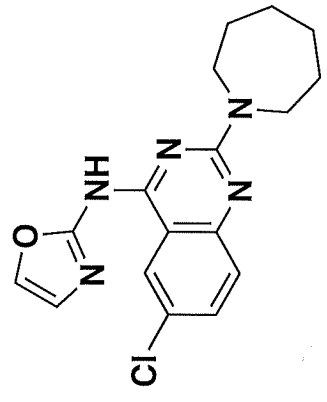

2

3.94  
4.00

3.97

0.94  
0.85

0.84  
0.68

0.82  
0.62

2

4

6

8

10

USER: -- DATE: Jun. 1

|                            |              |                                             |                       |
|----------------------------|--------------|---------------------------------------------|-----------------------|
| WARD 1H OBSERVE;blank line | OF1: 1804.4  | PTS1d: 16384                                | USER: -- DATE: Jun. 1 |
| 18                         | F2: 75.421   | Nutrs - \$CP-CIG-0000756-075-A-HI-DMSO-0701 |                       |
|                            | PW: 6.2 usec | LB: 0.0                                     |                       |
|                            | PD: 1.0 sec  | NA: 16                                      |                       |
|                            | SW1: 7987    |                                             |                       |



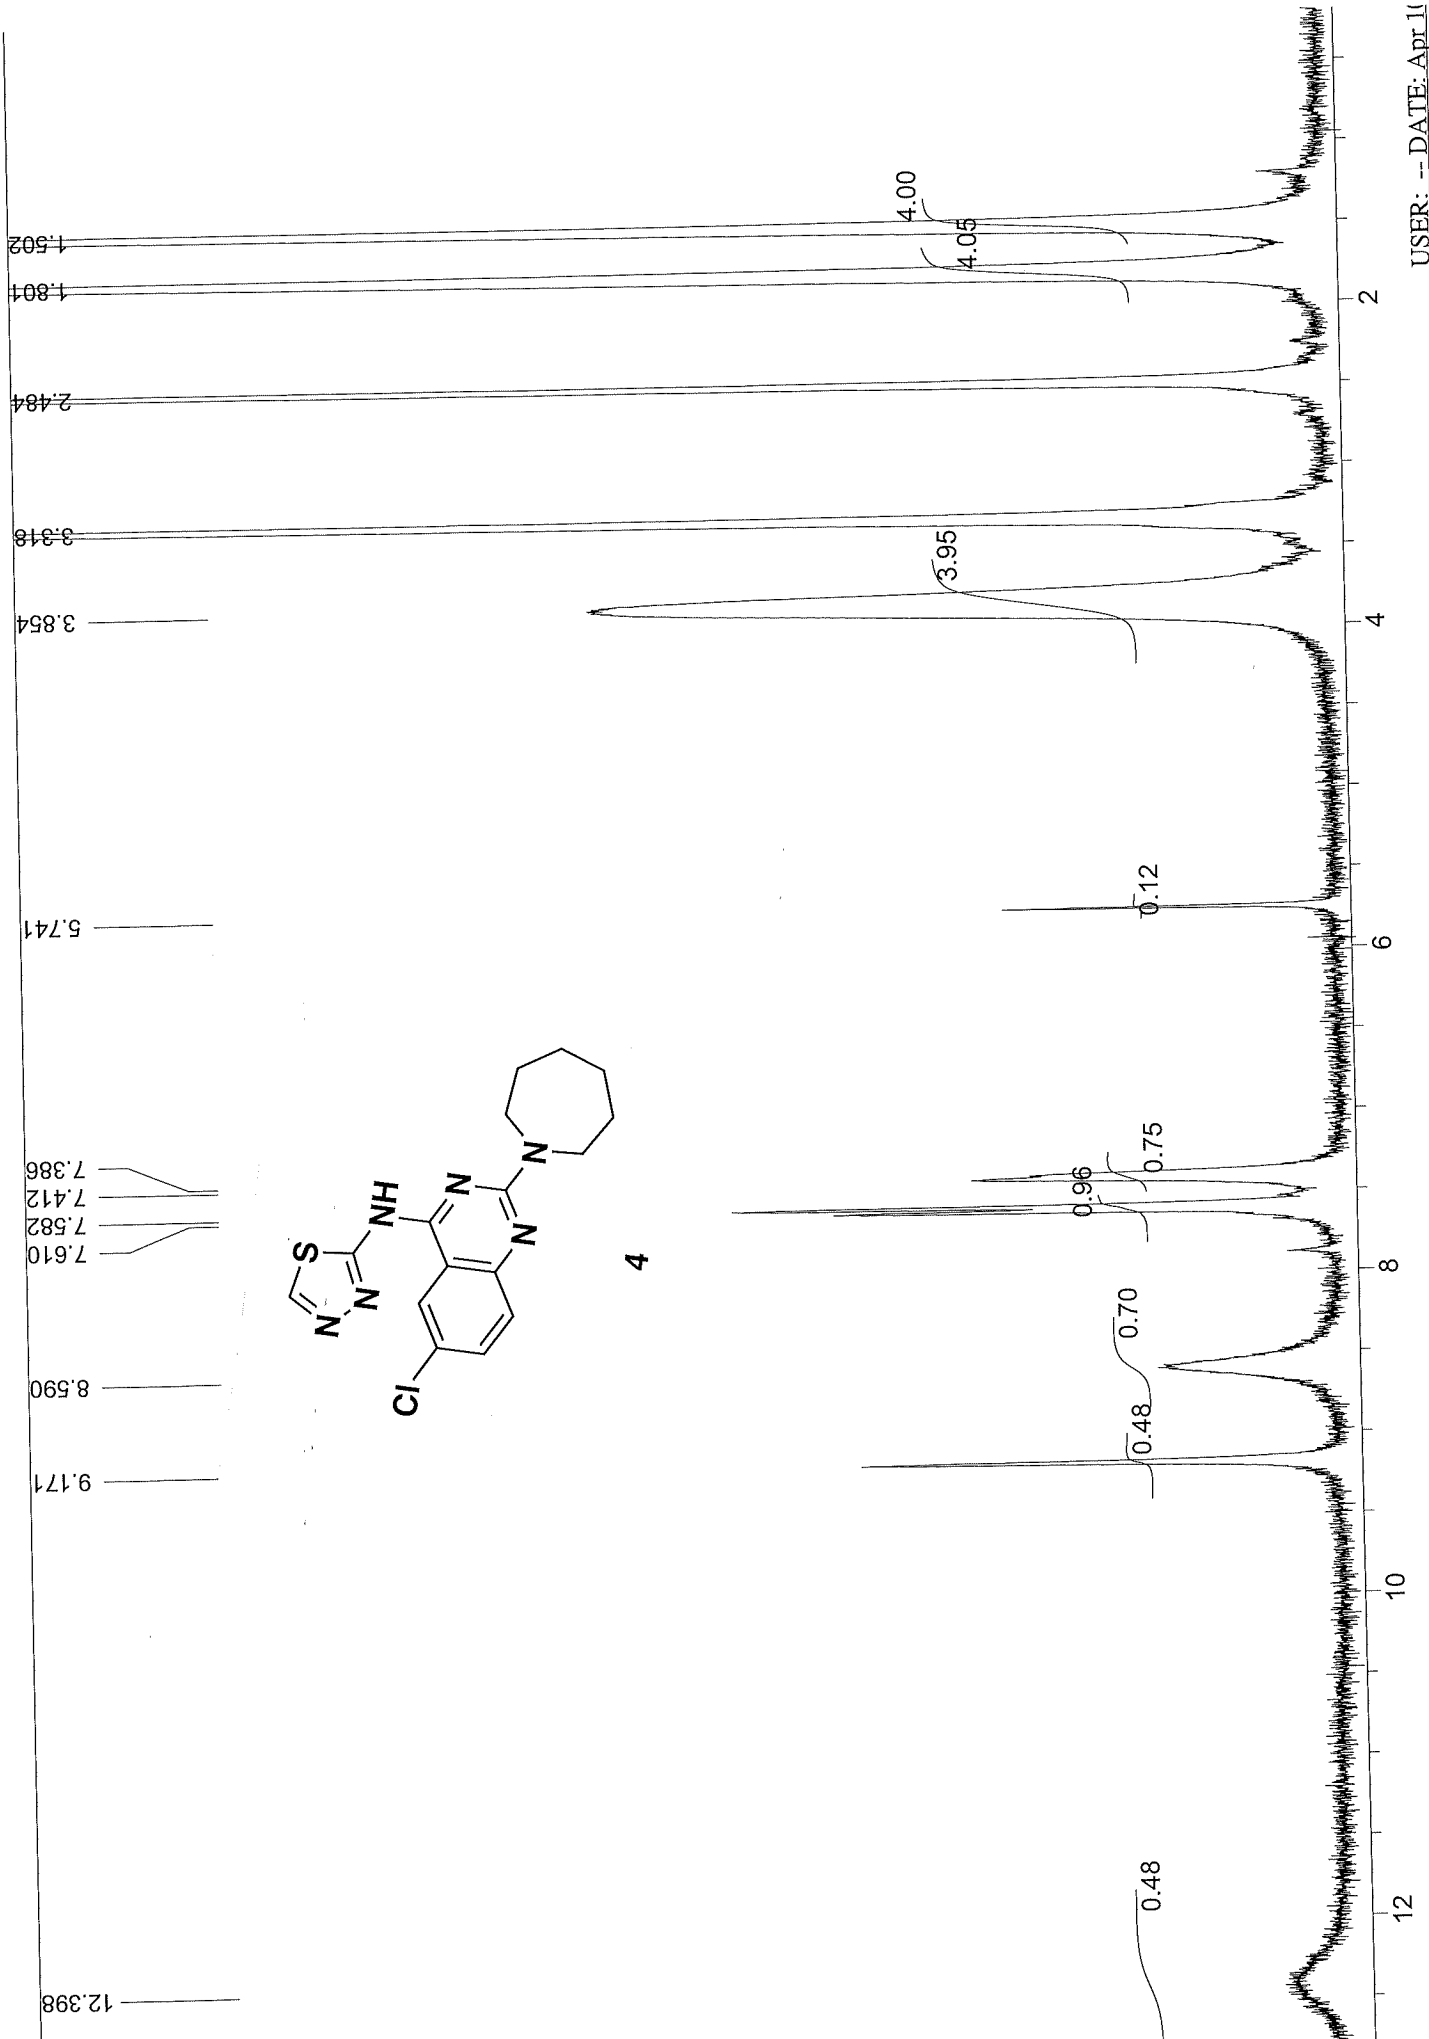

USER: -- DATE: Apr 11  
 PTD: 16384  
 Nuts - \$CP-CJG-756-043-A-H1-DMSO-C  
 OF1: 1784.2  
 NA: 12  
 LB: 0.0  
 SW1: 7987  
 F2: 75.423  
 PD: 1.0 sec  
 PW: 8.0 usec  
 HARD\_1H OBSERVE: blank line  
 11

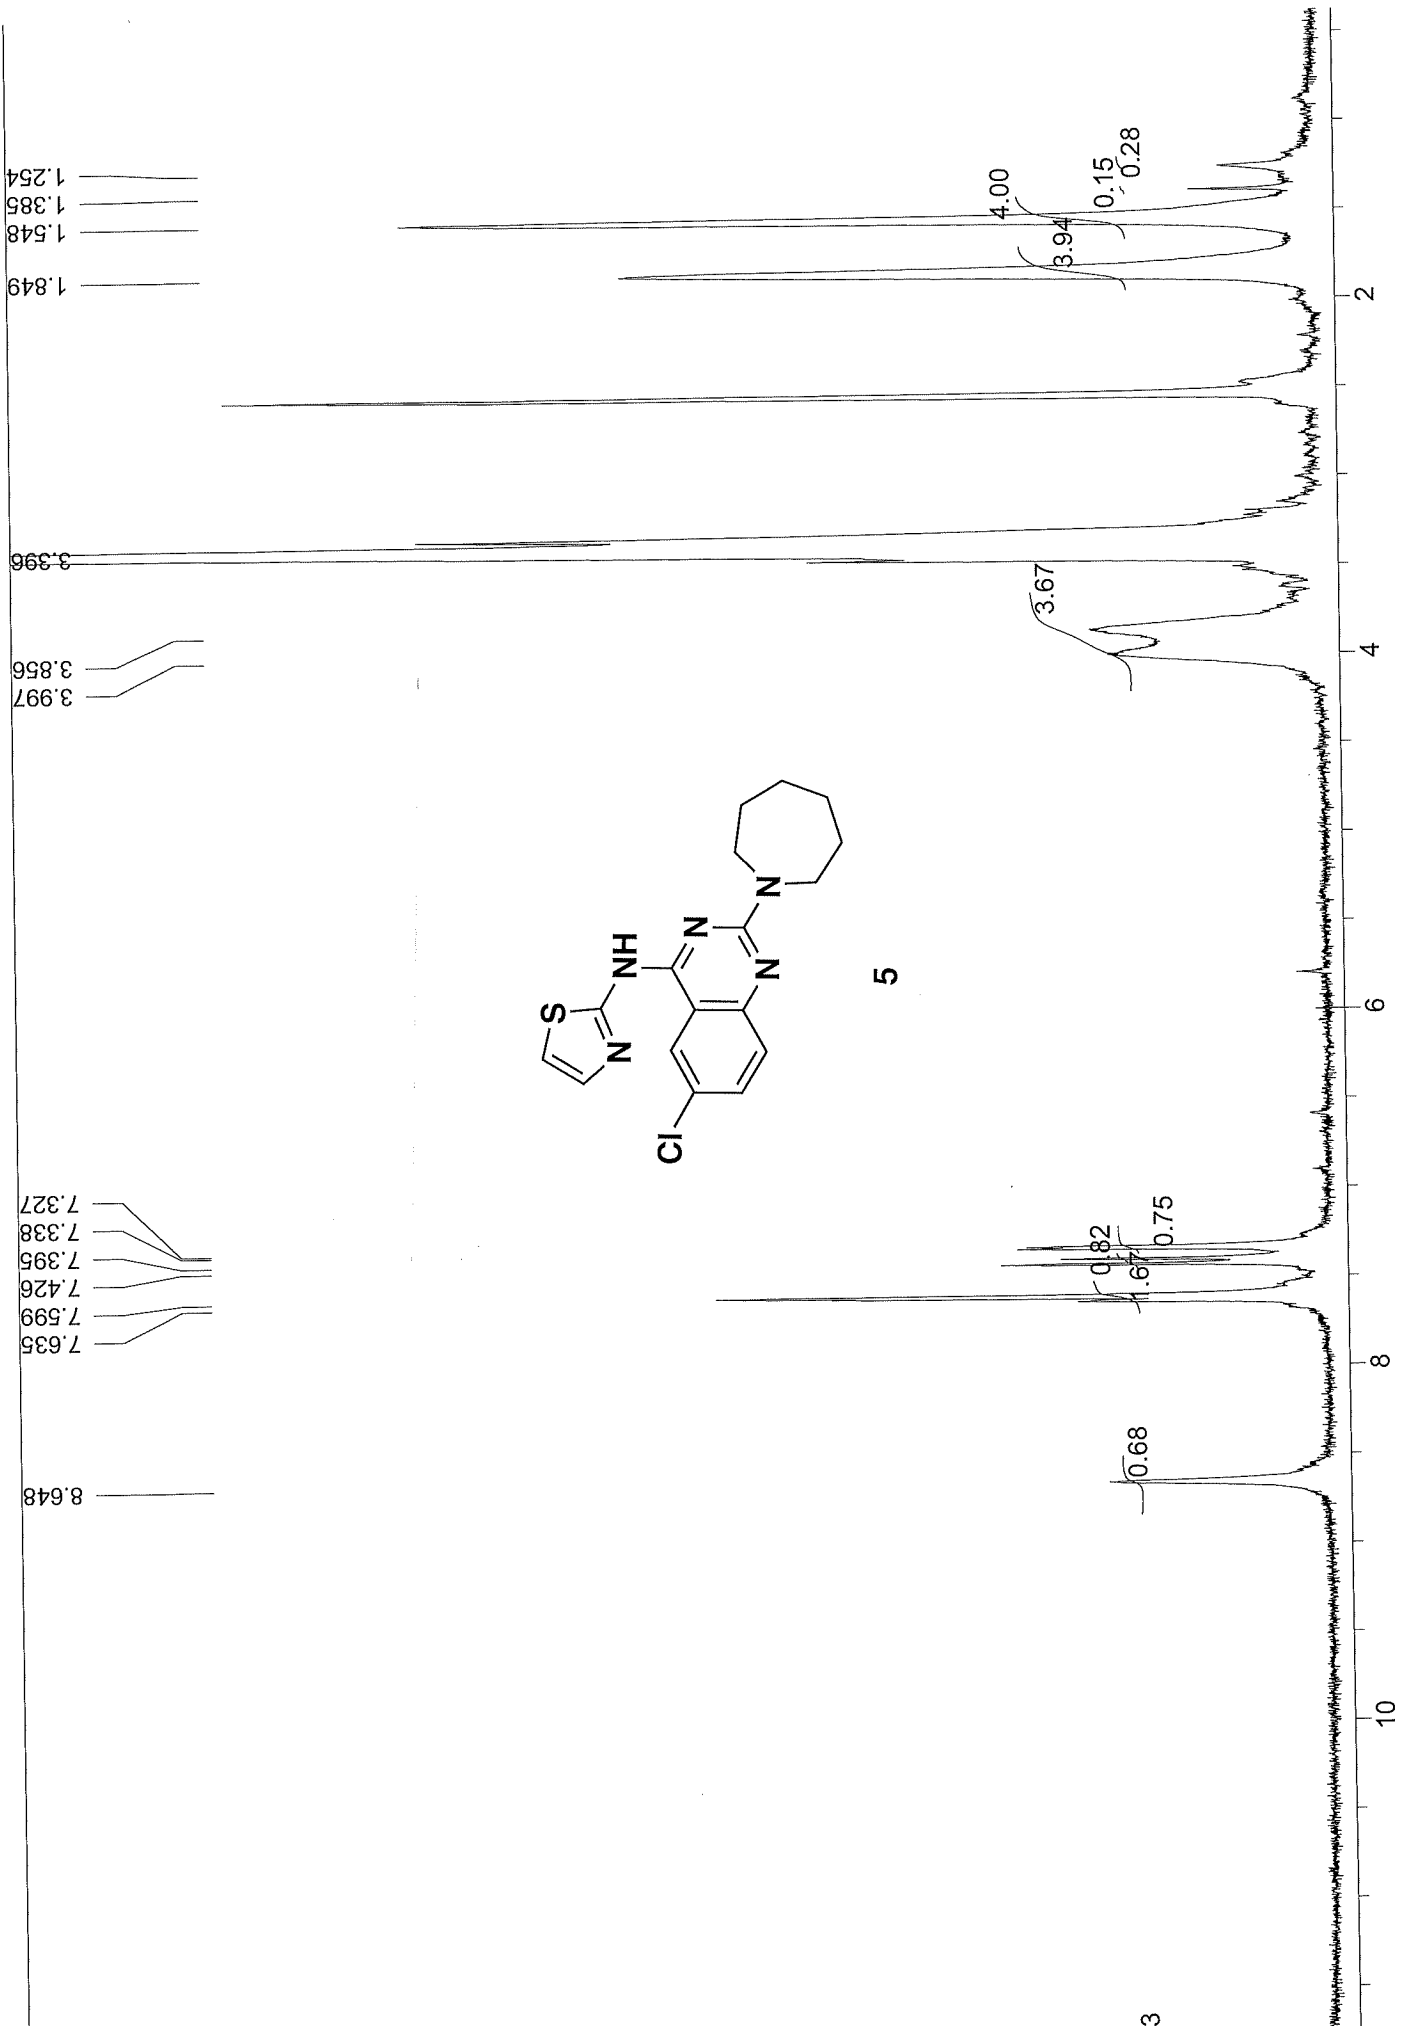

USER: -- DATE: Apr 11

|                                      |             |              |                            |
|--------------------------------------|-------------|--------------|----------------------------|
| PTSD: 16384                          | OF1: 1799.7 | SW1: 7987    | ARD 1H OBSERVE: blank line |
| Nuts - \$CP-LXM-856-6-A-HI-DMSO-070: | NA: 8       | PW: 8.0 usec | 24                         |
| LB: 0.0                              | PD: 1.0 sec |              | 1                          |

8.214  
7.950  
7.806  
7.801  
7.777  
7.455  
4.003  
3.850  
3.433  
3.417  
2.491  
2.486  
2.380  
1.875  
1.562

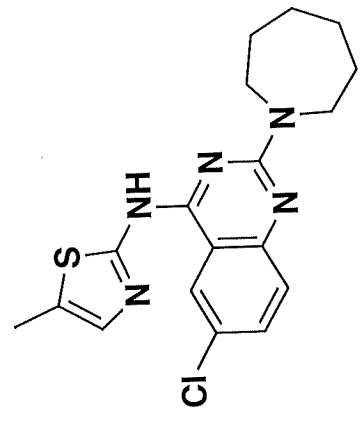

9

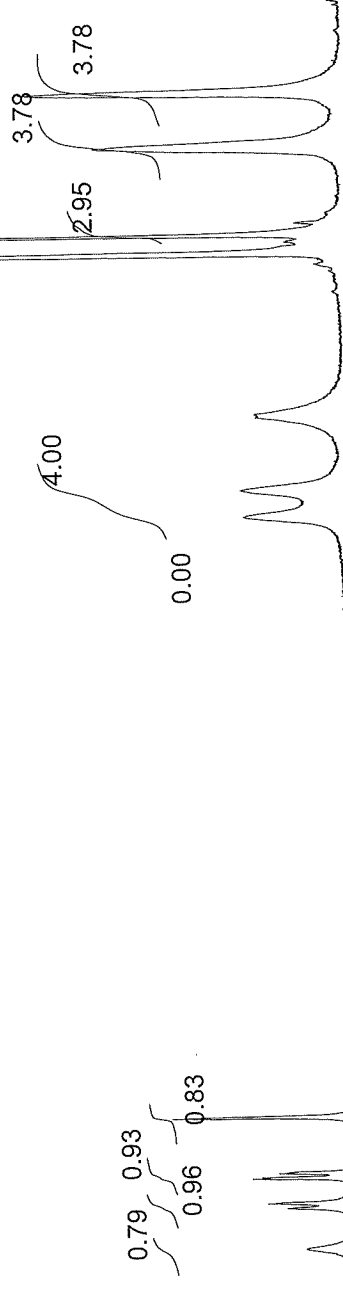

USER: -- DATE: Apr 1

|                                      |             |              |                           |
|--------------------------------------|-------------|--------------|---------------------------|
| PTSD: 16384                          | OF1: 1784.2 | SW1: 7987    | RD 1H OBSERVE: blank line |
| Nuts - \$CP-fx1740-49-A-H1-DMSO-070- | LB: 0.0     | PW: 8.0 usec | 24                        |
|                                      | NA: 16      | PD: 1.0 sec  | F2: 75.423                |

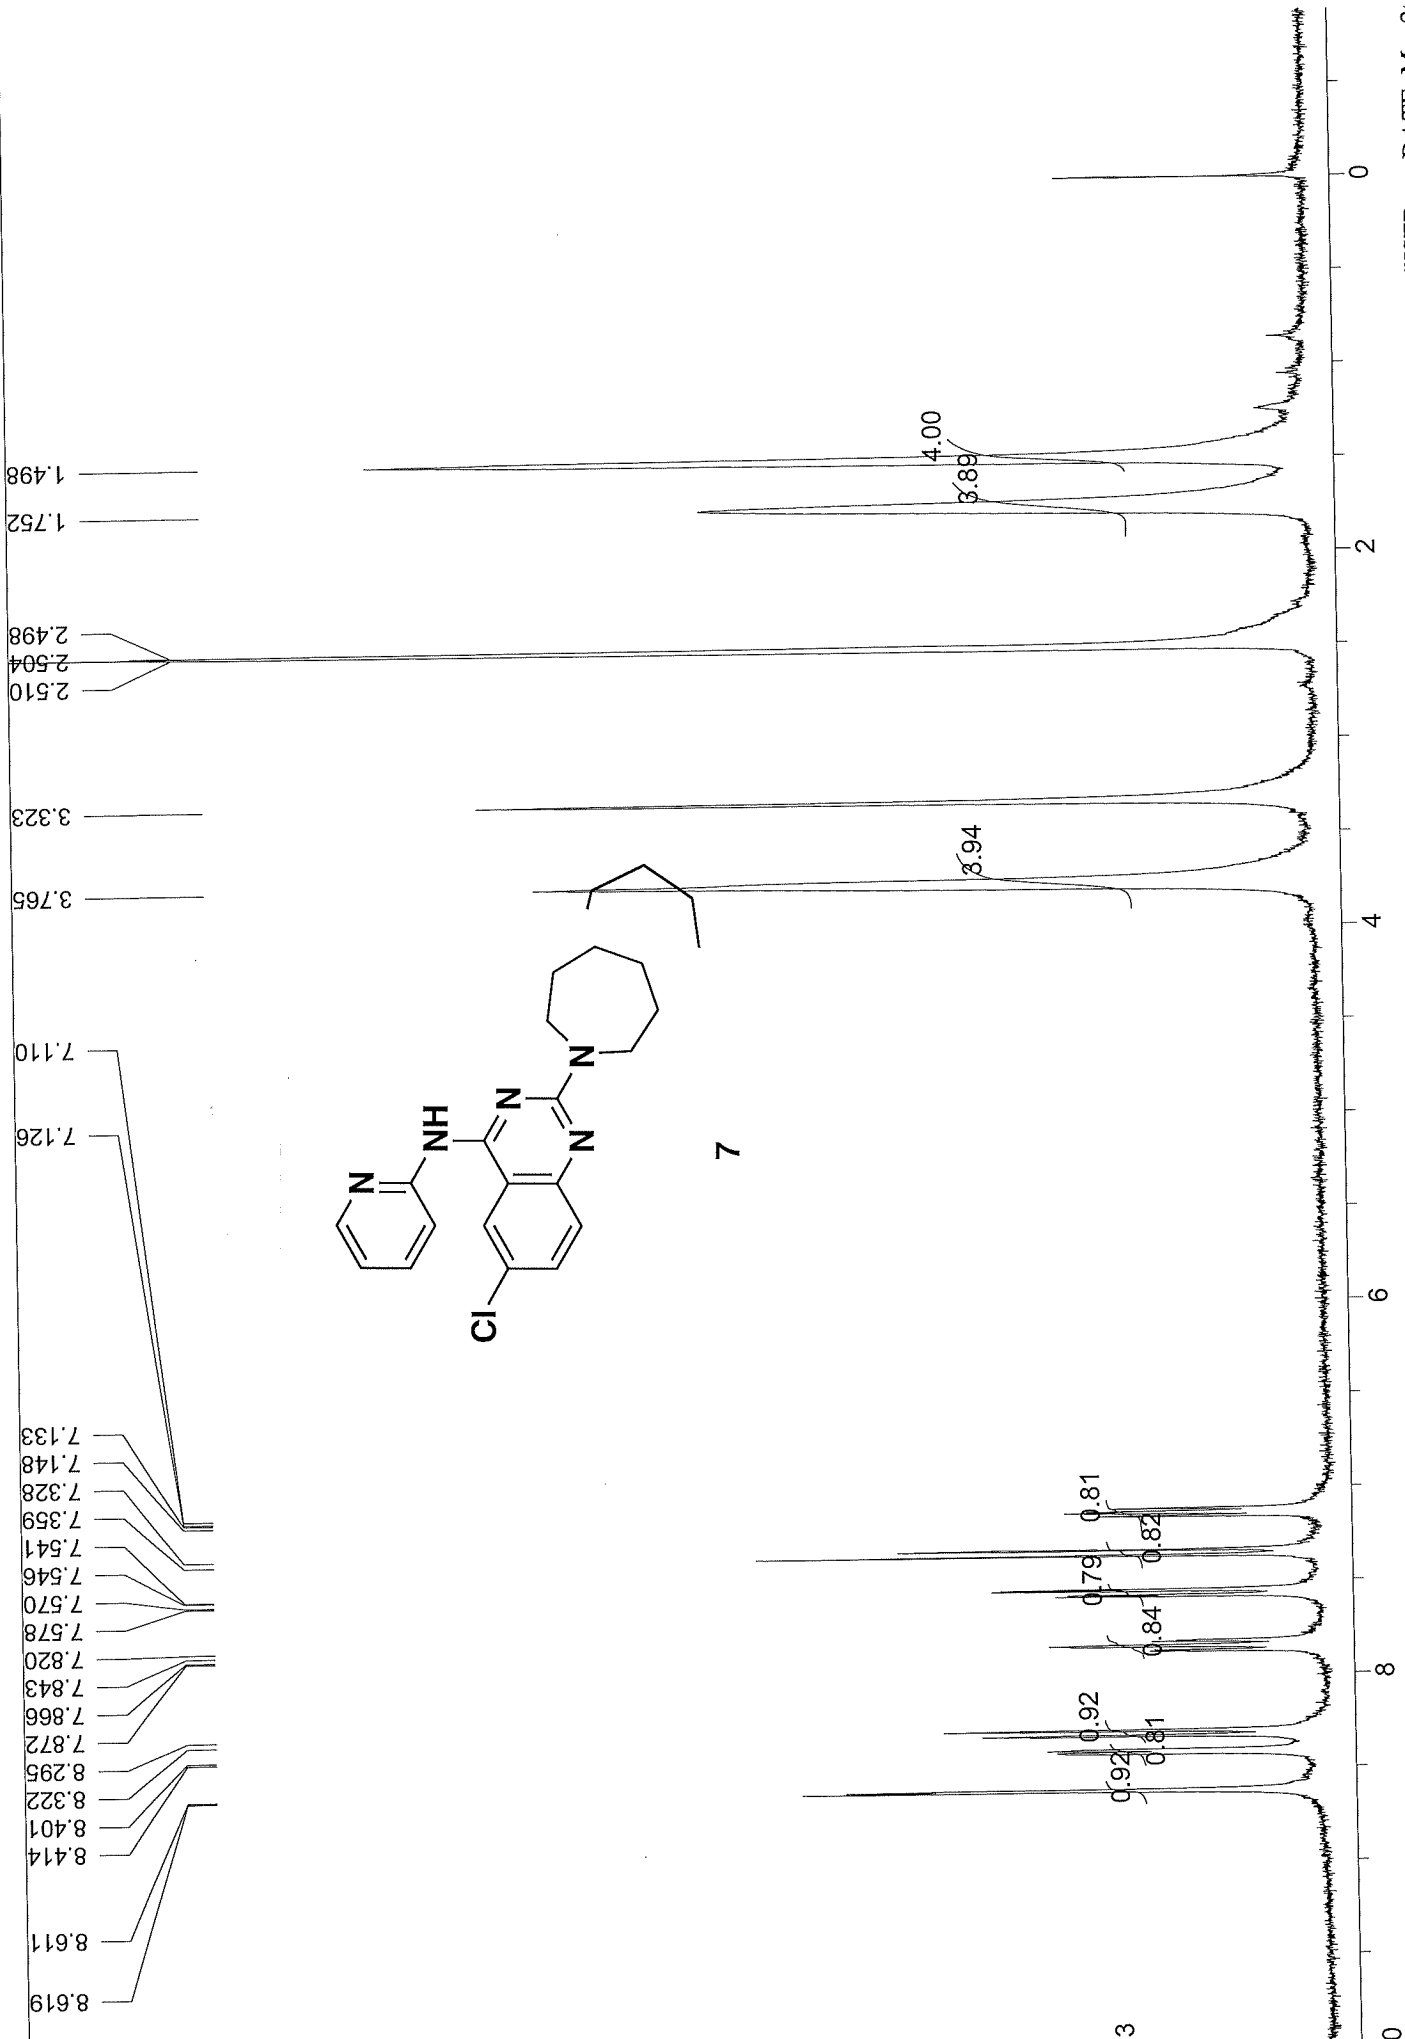

USER: -- DATE: Mar 21

PTS1d: 16384

Nuts - \$CP-CIG-756-30-A-HI-DMSO-070:

OF1: 1789.1

NA: 8

PD: 1.0 sec

LB: 0.0

SW1: 7987

PW: 8.0 usec

F2: 75.423

ARD\_1H OBSERVE: blank line

224

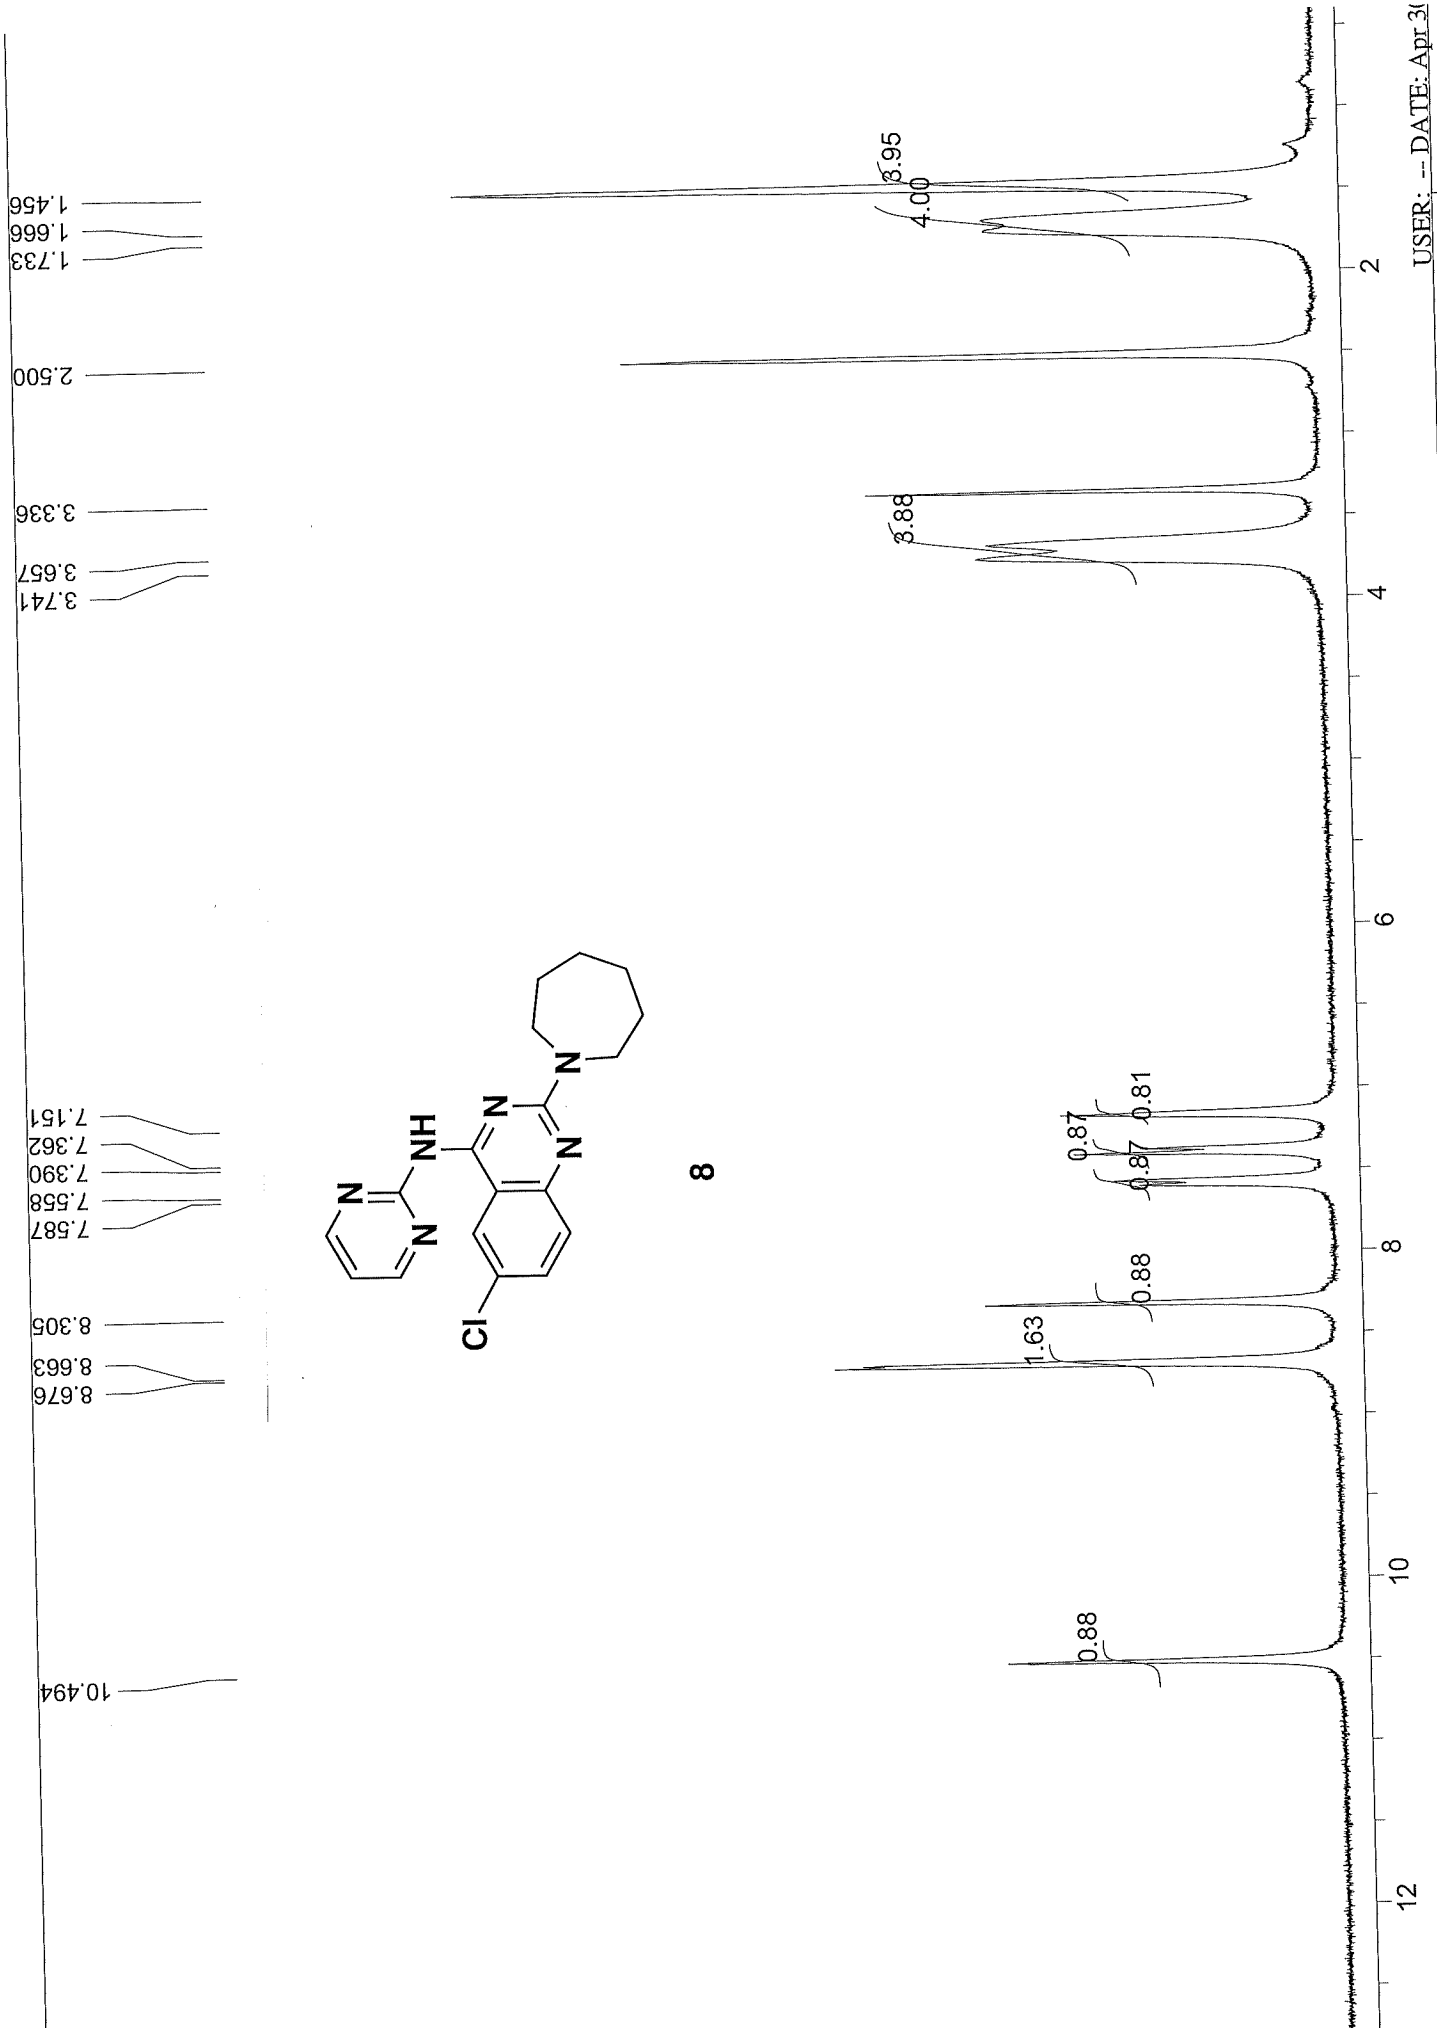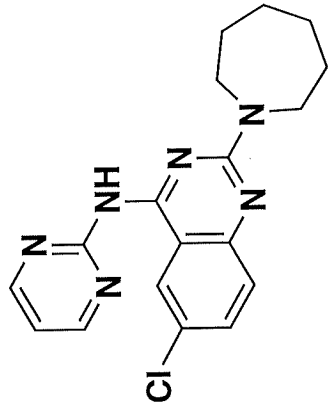

8

USER: -- DATE: Apr 31  
 PTS1d: 16384  
 Nuts - \$CP-CJG-0000756-041-A-H1-DMSO-070  
 OF1: 1788.0  
 LB: 0.0  
 NA: 8  
 SW1: 7987  
 PD: 1.0 sec  
 F2: 75.423  
 PW: 8.0 usec



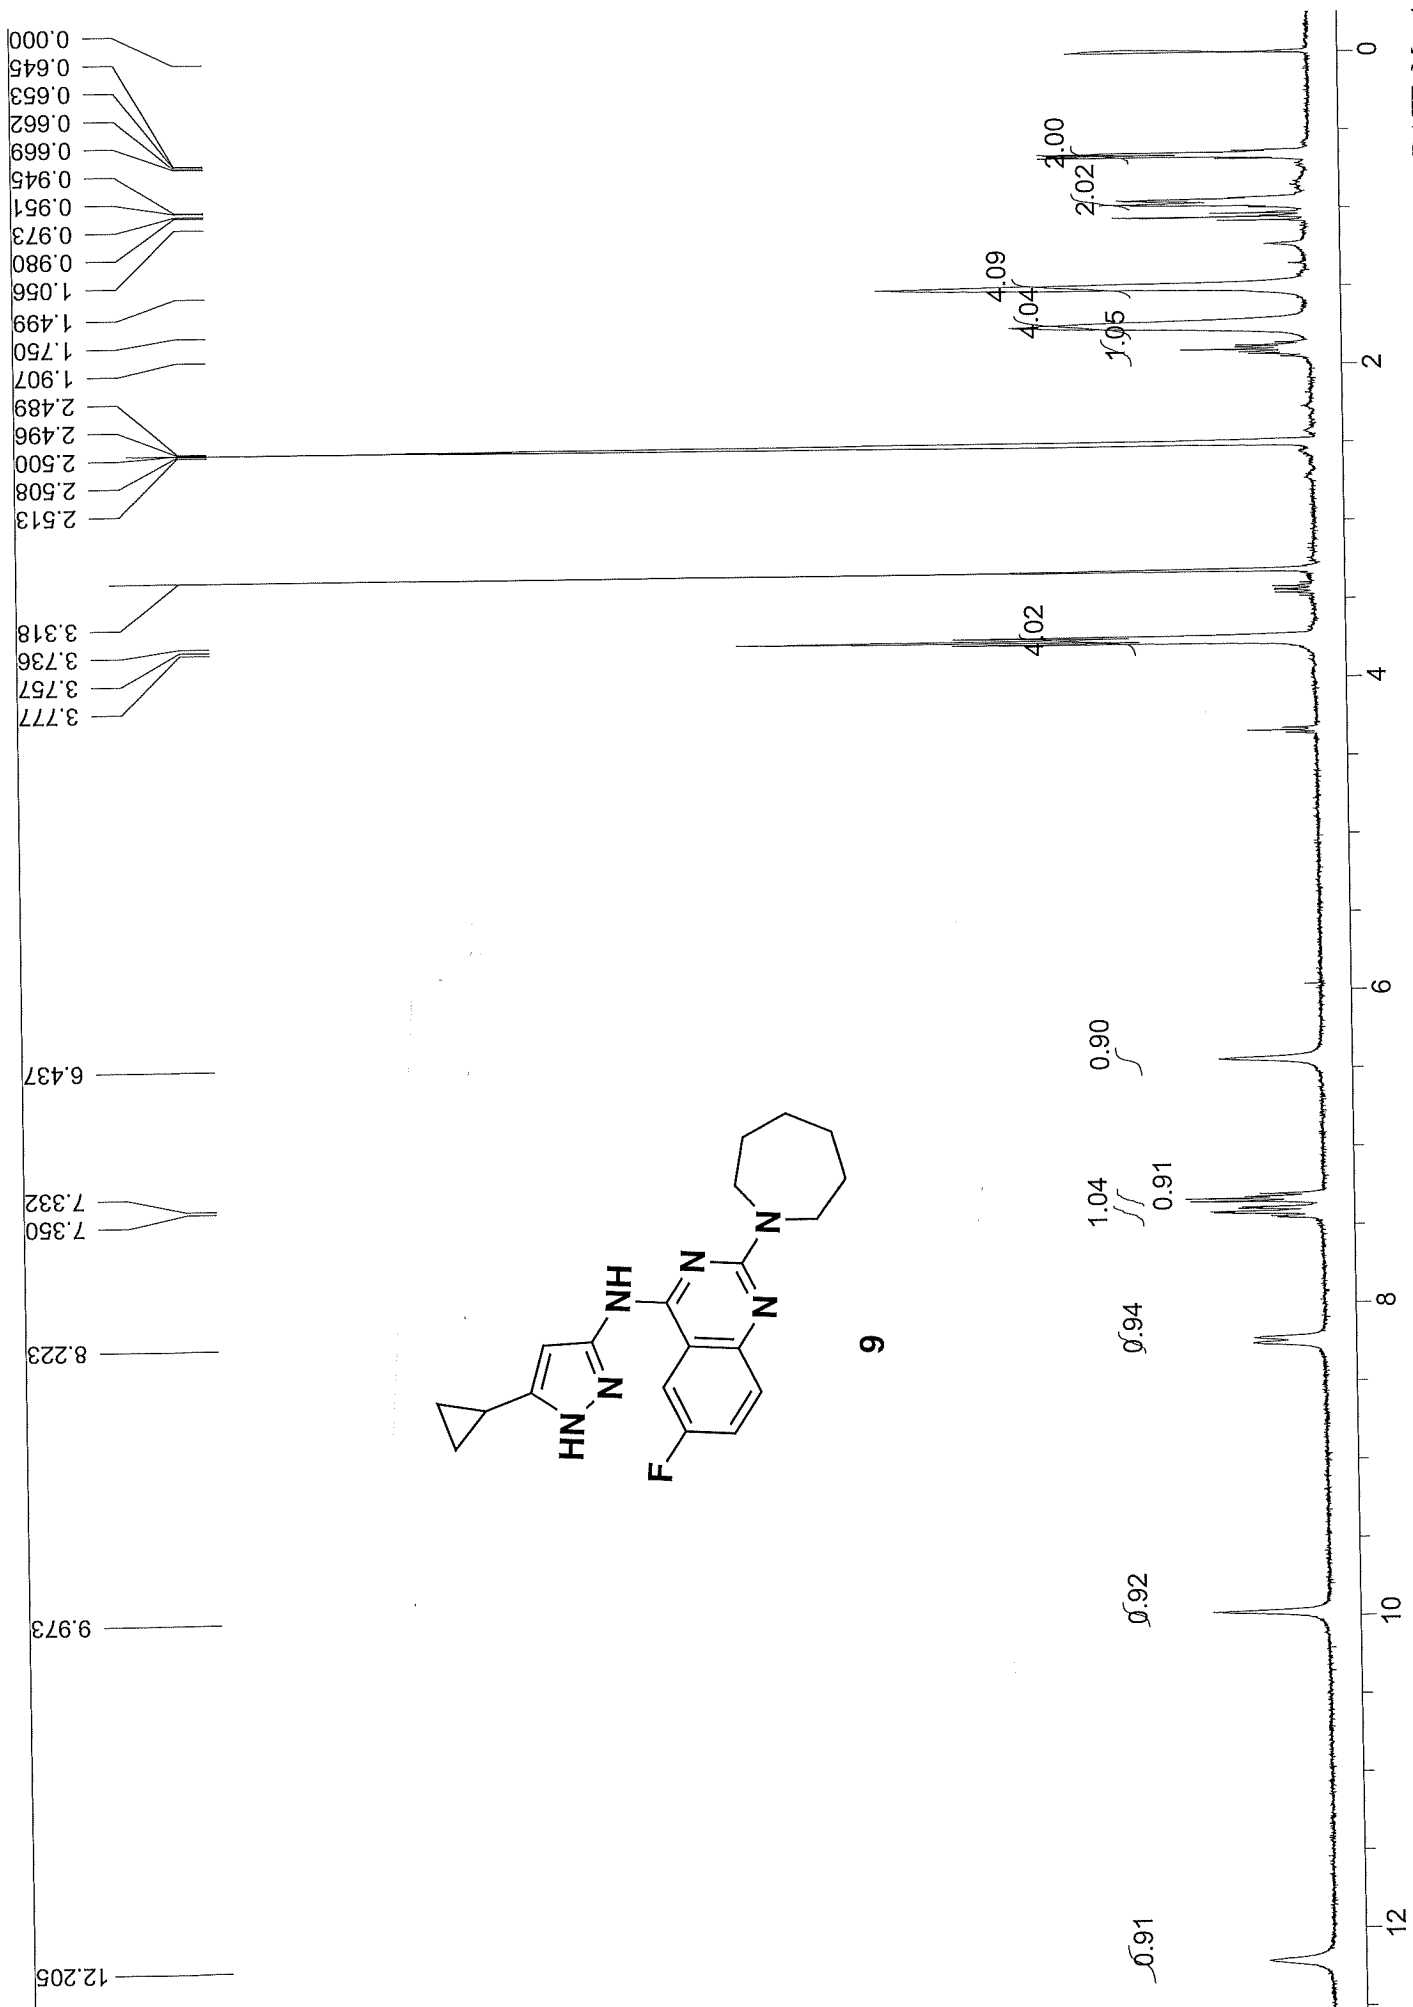

USER: -- DATE: Mar. 24

PTS1d: 16384

OF1: 1788.5

NA: 8

PD: 1.0\_sec

SW1: 7987

PW: 8.0\_usec

LB: 0.0

Nutts - \$CP-ZF-0000741-02-F-H1-DMSO-070

WARD 1H OBSERVE;blank line

F2: 75.423

12.174  
9.833  
8.179  
7.368  
7.339  
7.231  
7.202  
6.435  
3.776  
3.757  
3.737  
3.332  
2.505  
2.349  
1.905  
1.750  
1.499  
1.053  
1.032  
0.969  
0.942  
0.667  
0.651

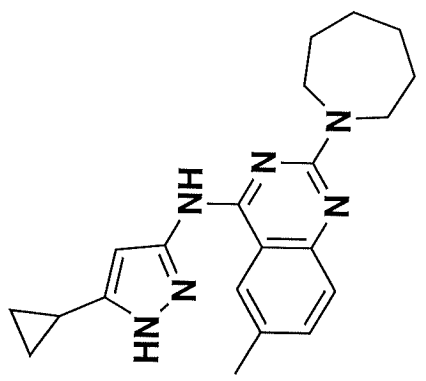

10

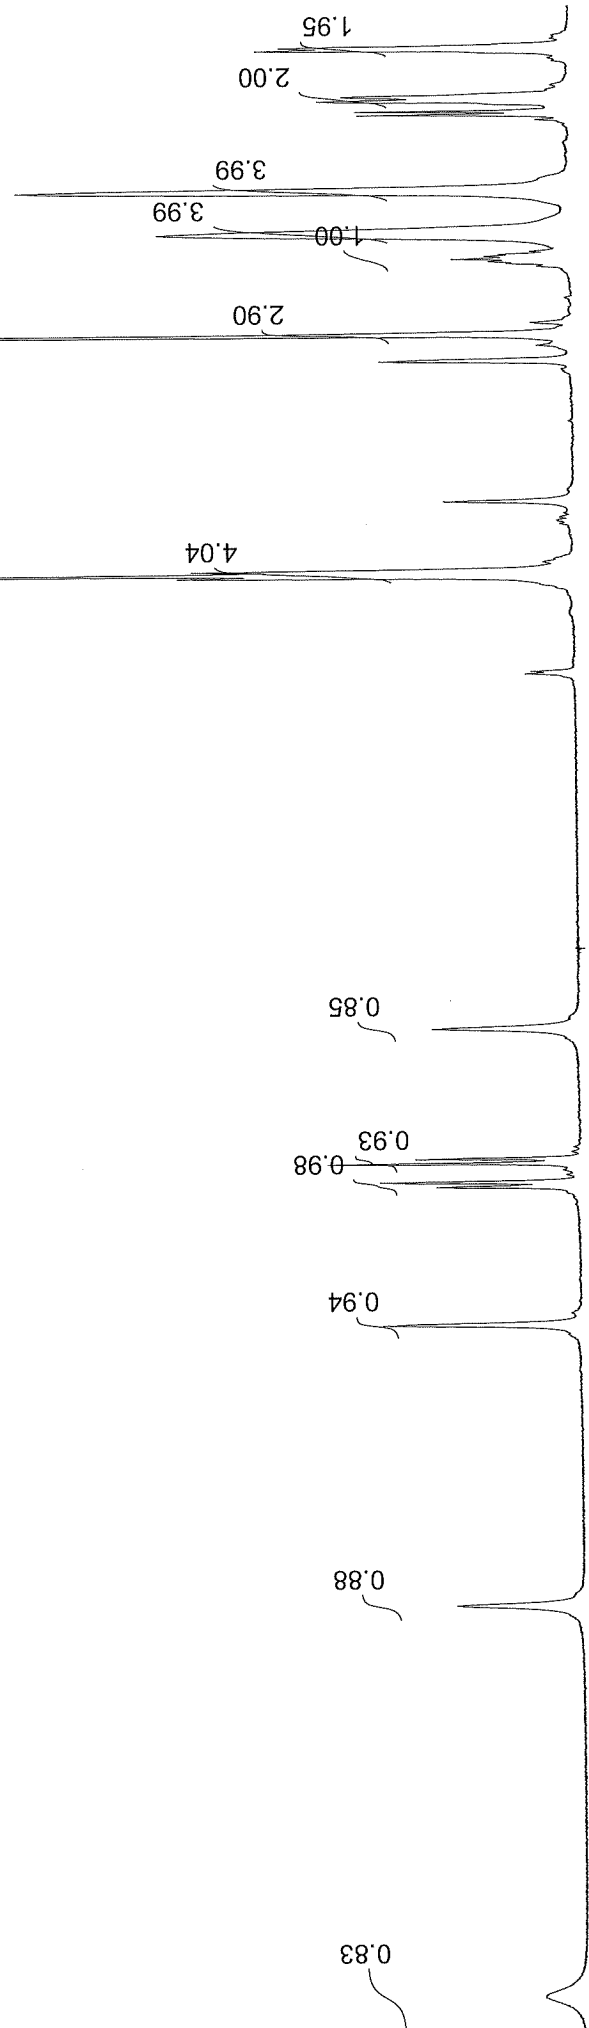

RD IH OBSERVE:blank line  
 24 | F2: 75.423 | SW1: 7987 | PD: 1.0 sec | OF1: 1789.8 | LB: 0.0 | Nuts - \$CP-ZF-741-05-B-H1-DMSO-070 | PTS1d: 16384 | USER: -- DATE: Mar '14

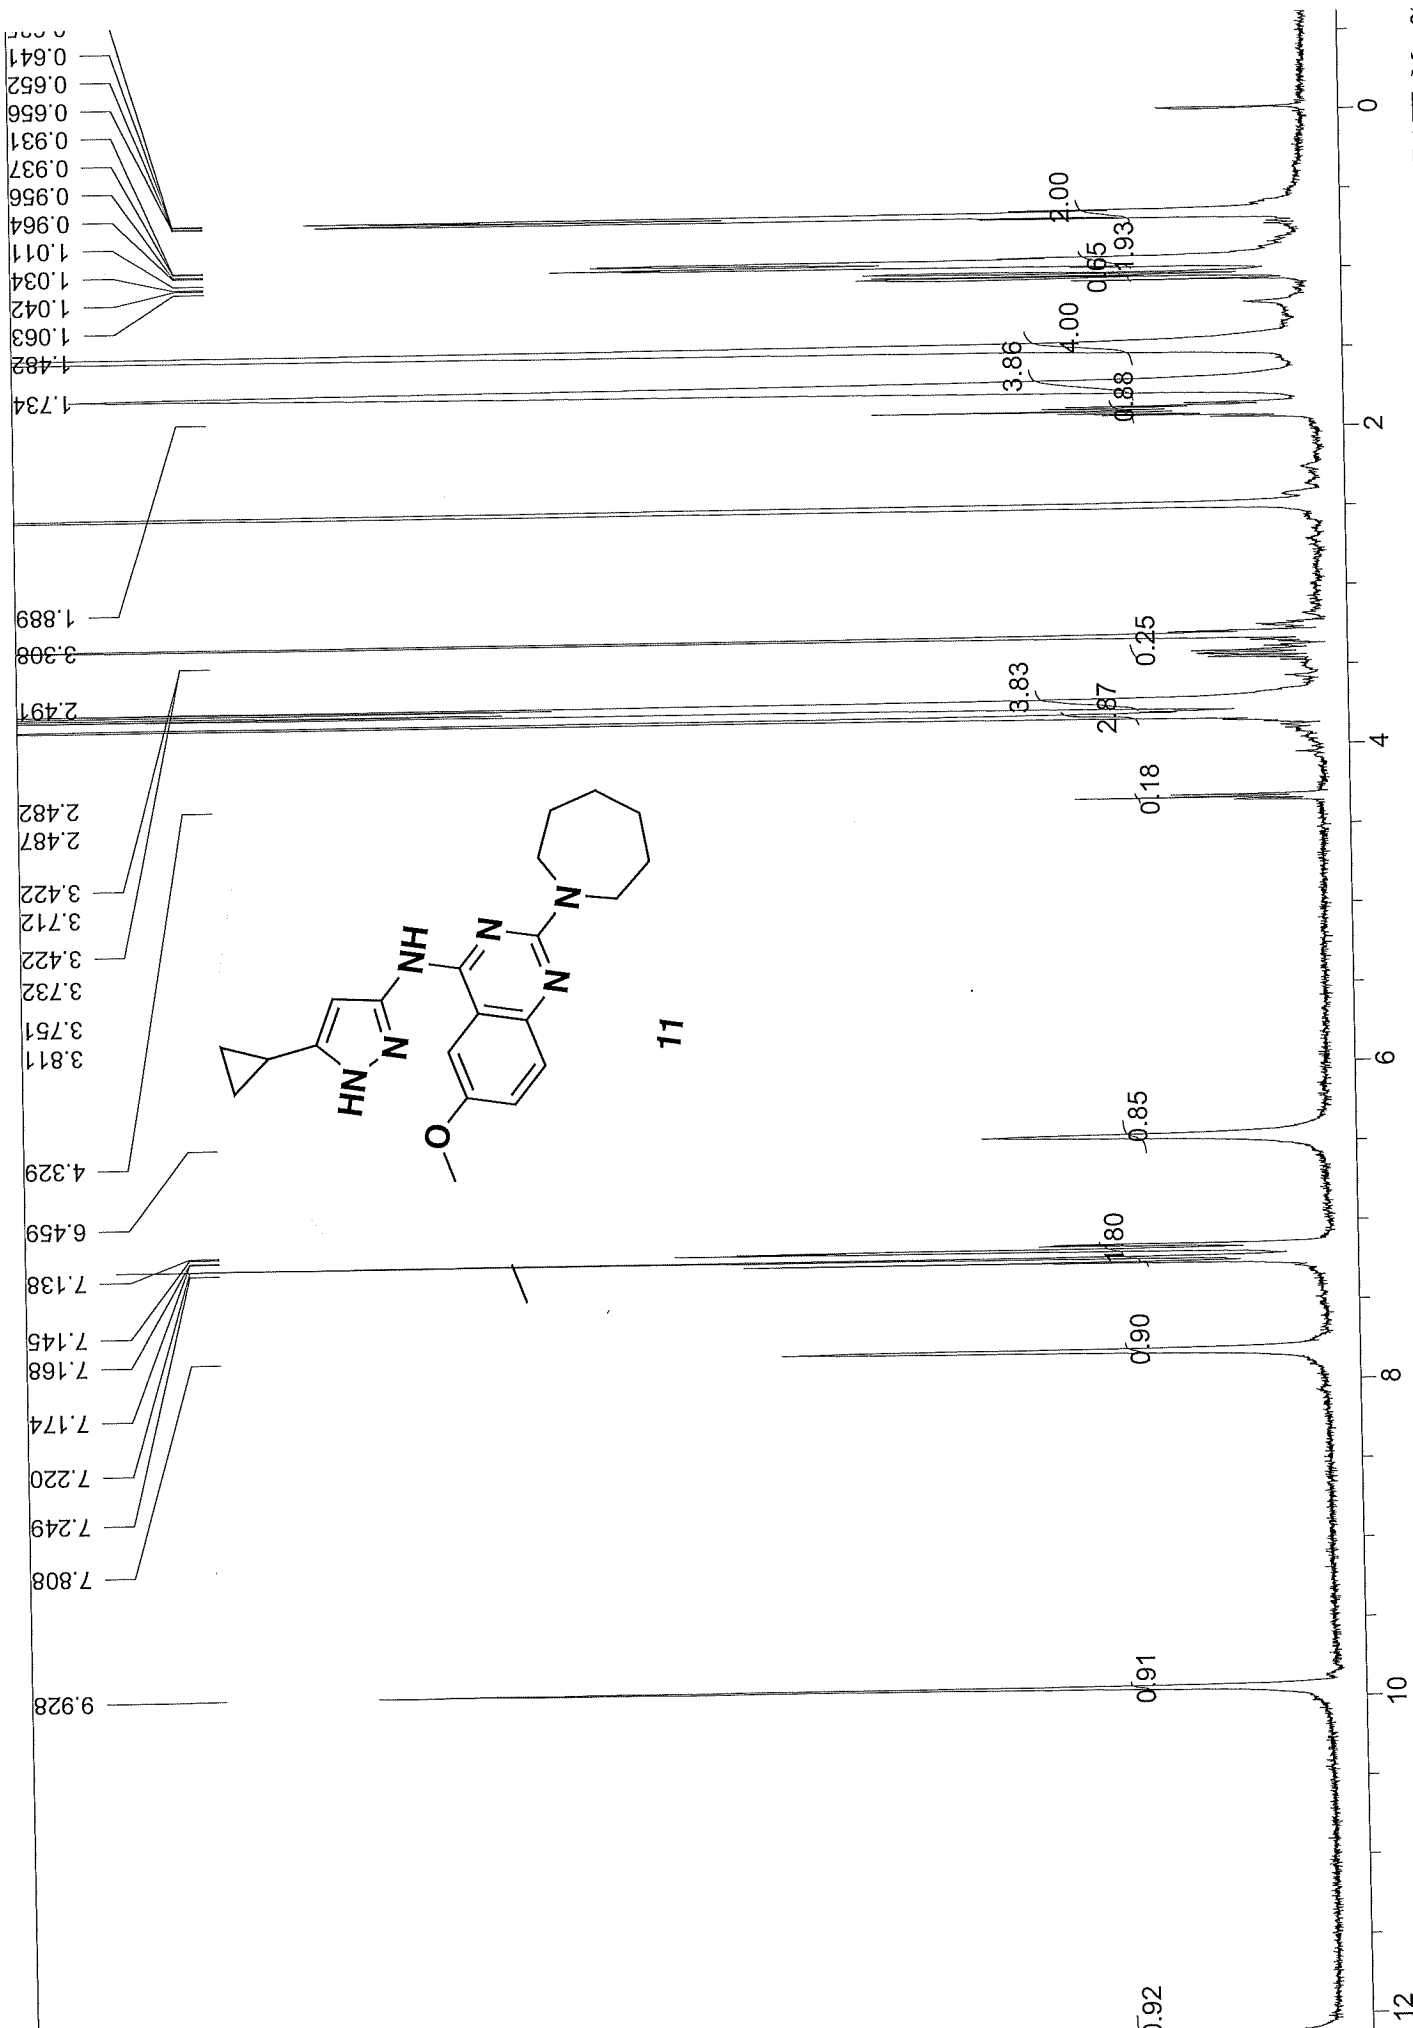

USER: -- DATE: Mar 21

|                                       |             |             |              |                           |
|---------------------------------------|-------------|-------------|--------------|---------------------------|
| PTSD: 16384                           | OF1: 1784.2 | PD: 1.0 sec | SW1: 7987    | RD_1H OBSERVE: blank line |
| Nuts - \$CP-CJG-756-29-A-HI-DMSO-070: | NA: 8       | LB: 0.0     | PW: 8.0 usec | 24 F2: 75.423             |

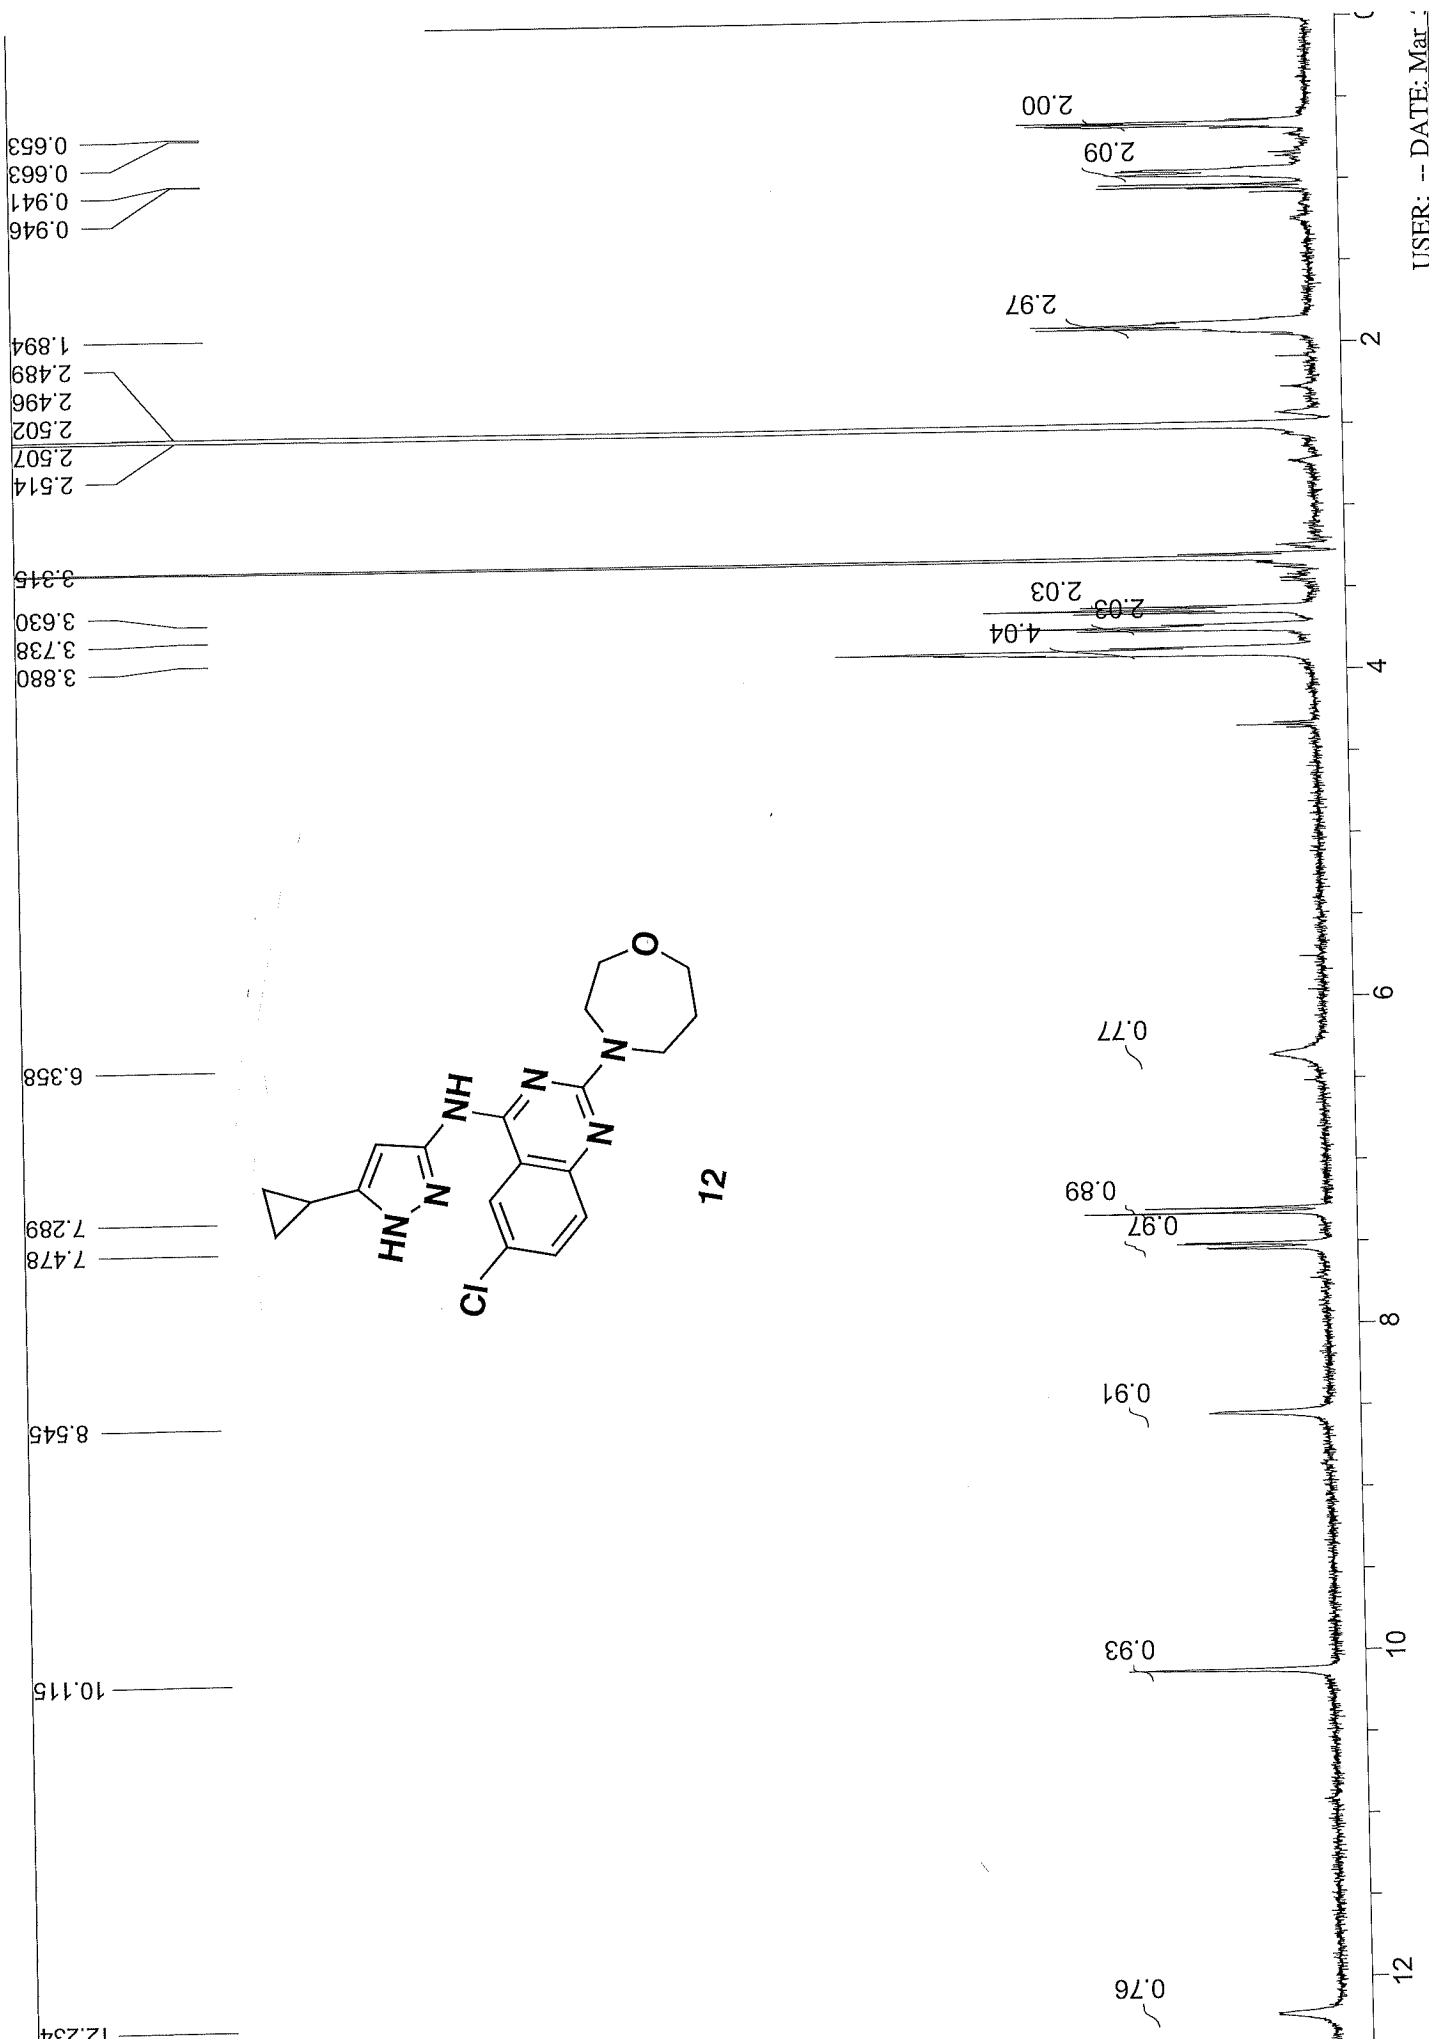

USER: -- DATE: Mar  
 PTSId: 16384  
 Nuts - \$CP-Cjg-756-10-A-H1-DMSO-070:  
 OF1: 1788.5  
 NA: 32  
 LB: 0.0  
 SW1: 7987  
 PW: 8.0 usec  
 PD: 1.0 sec  
 RD 1H OBSERVE: blank line  
 F2: 75.423

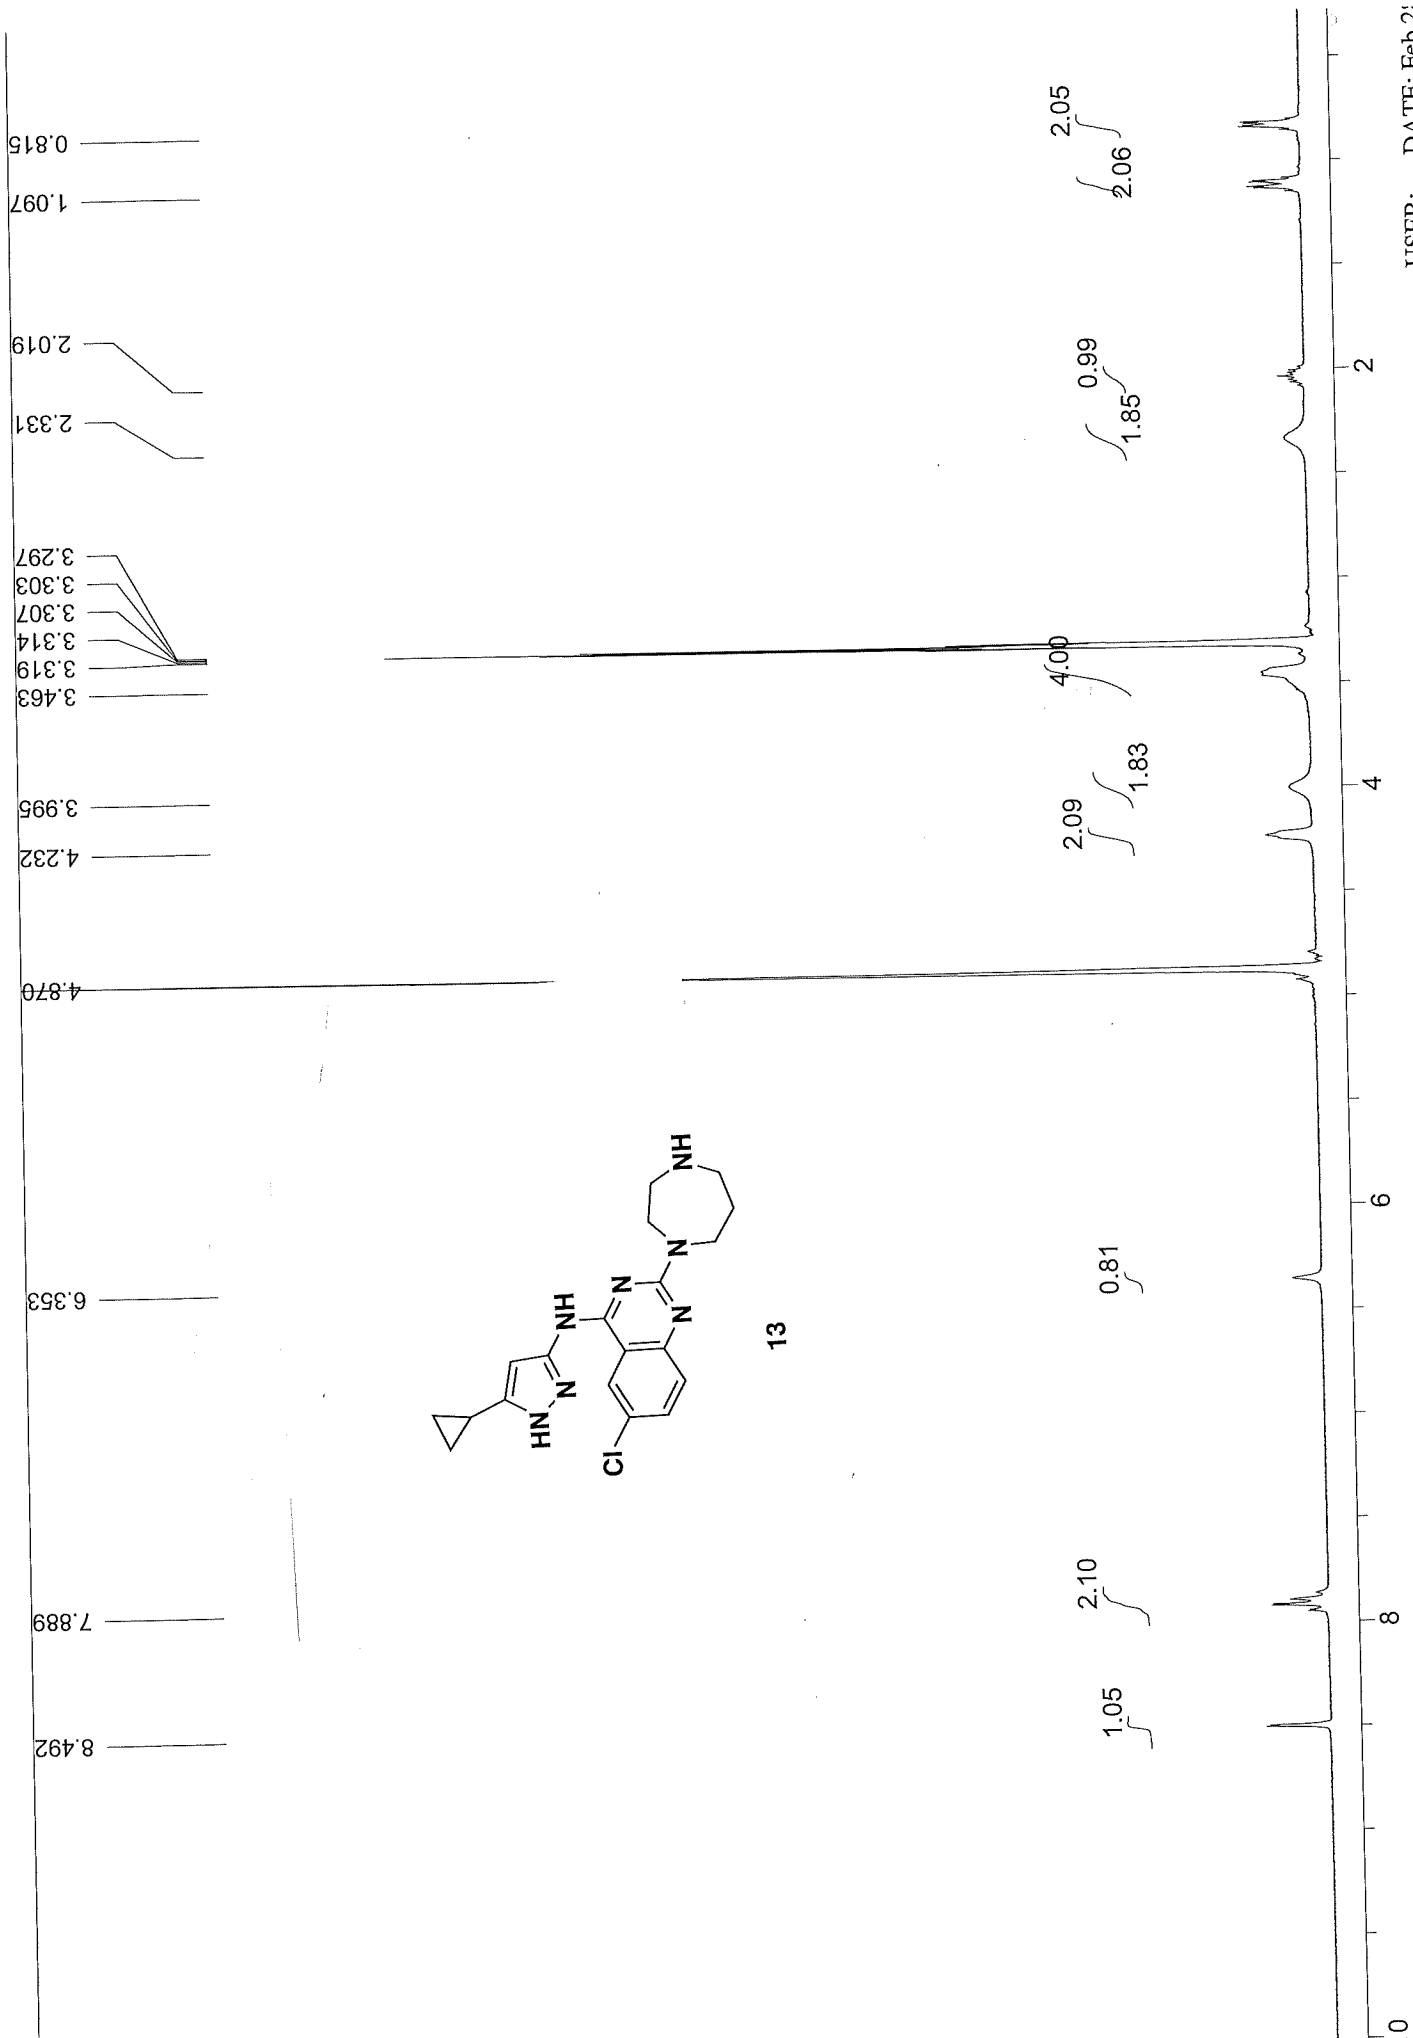

USER: -- DATE: Feb 21

|                                         |             |              |             |
|-----------------------------------------|-------------|--------------|-------------|
| PTSID: 16384                            | OF1: 1712.7 | SW1: 4803    | PD: 1.0 sec |
| Nuts - \$CP-HYC-738-14-H1-Methanol-070: | NA: 16      | PW: 6.2 usec |             |
| LB: 0.0                                 |             |              |             |

ARD 1H OBSERVE: blank line

924 F2: 75.423

ul

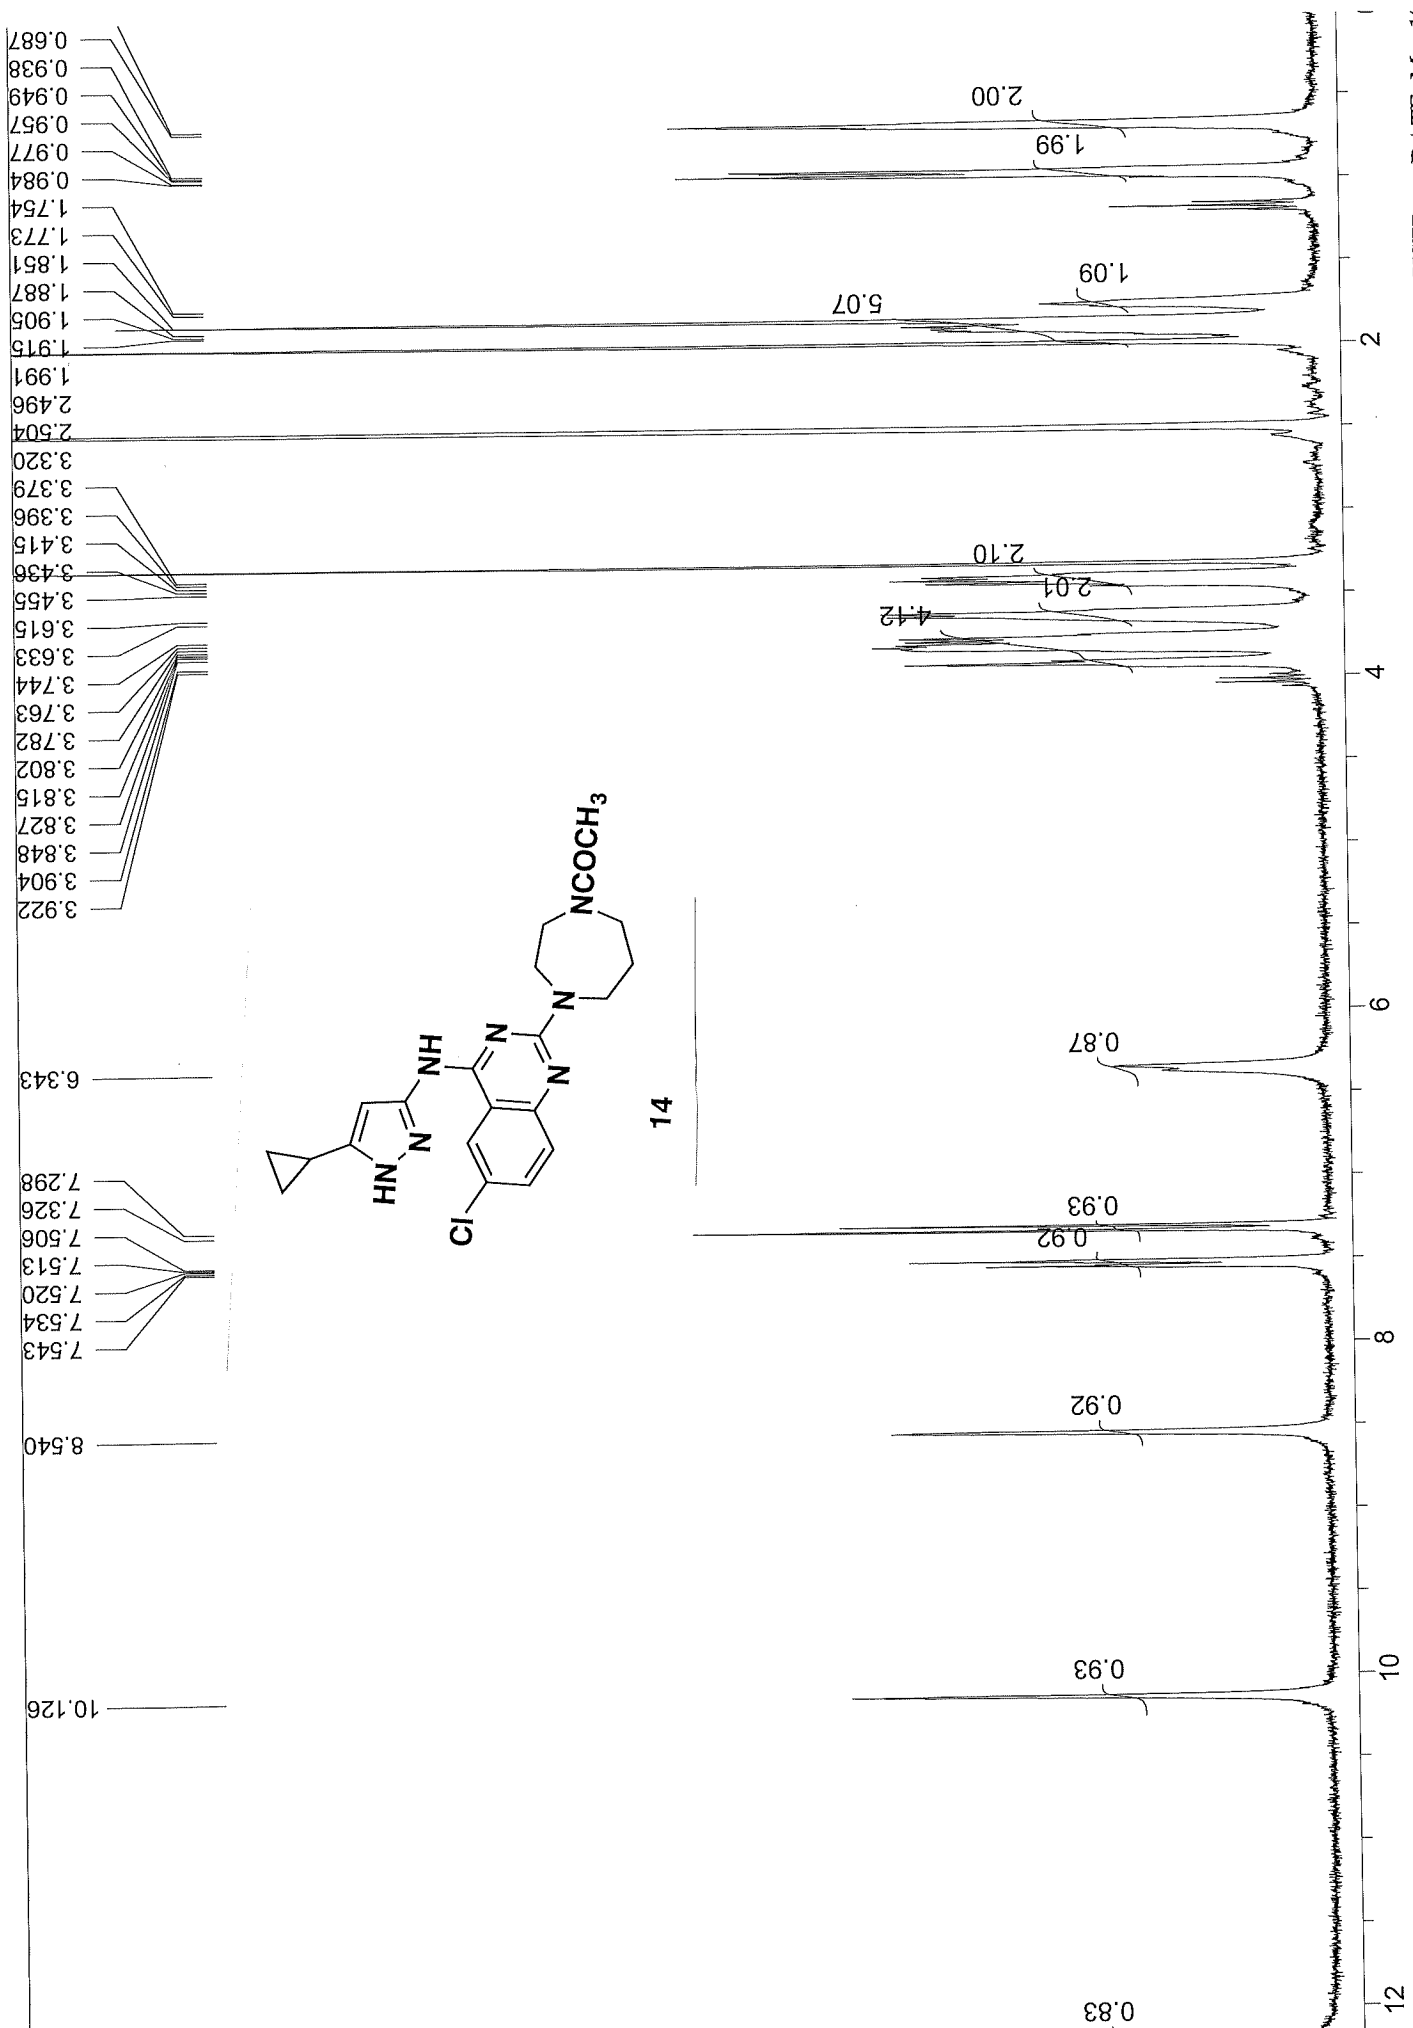

RD 1H OBSERVE: blank line  
 24 F2: 75.423  
 SW1: 7987  
 PW: 8.0 usec  
 OF1: 1788.9  
 NA: 8  
 PD: 1.0 sec  
 LB: 0.0  
 PTS1d: 16384  
 Nuts - \$CP-cjg-756-26-A-HI-DMSO-070:  
 USER: -- DATE: Mar 11

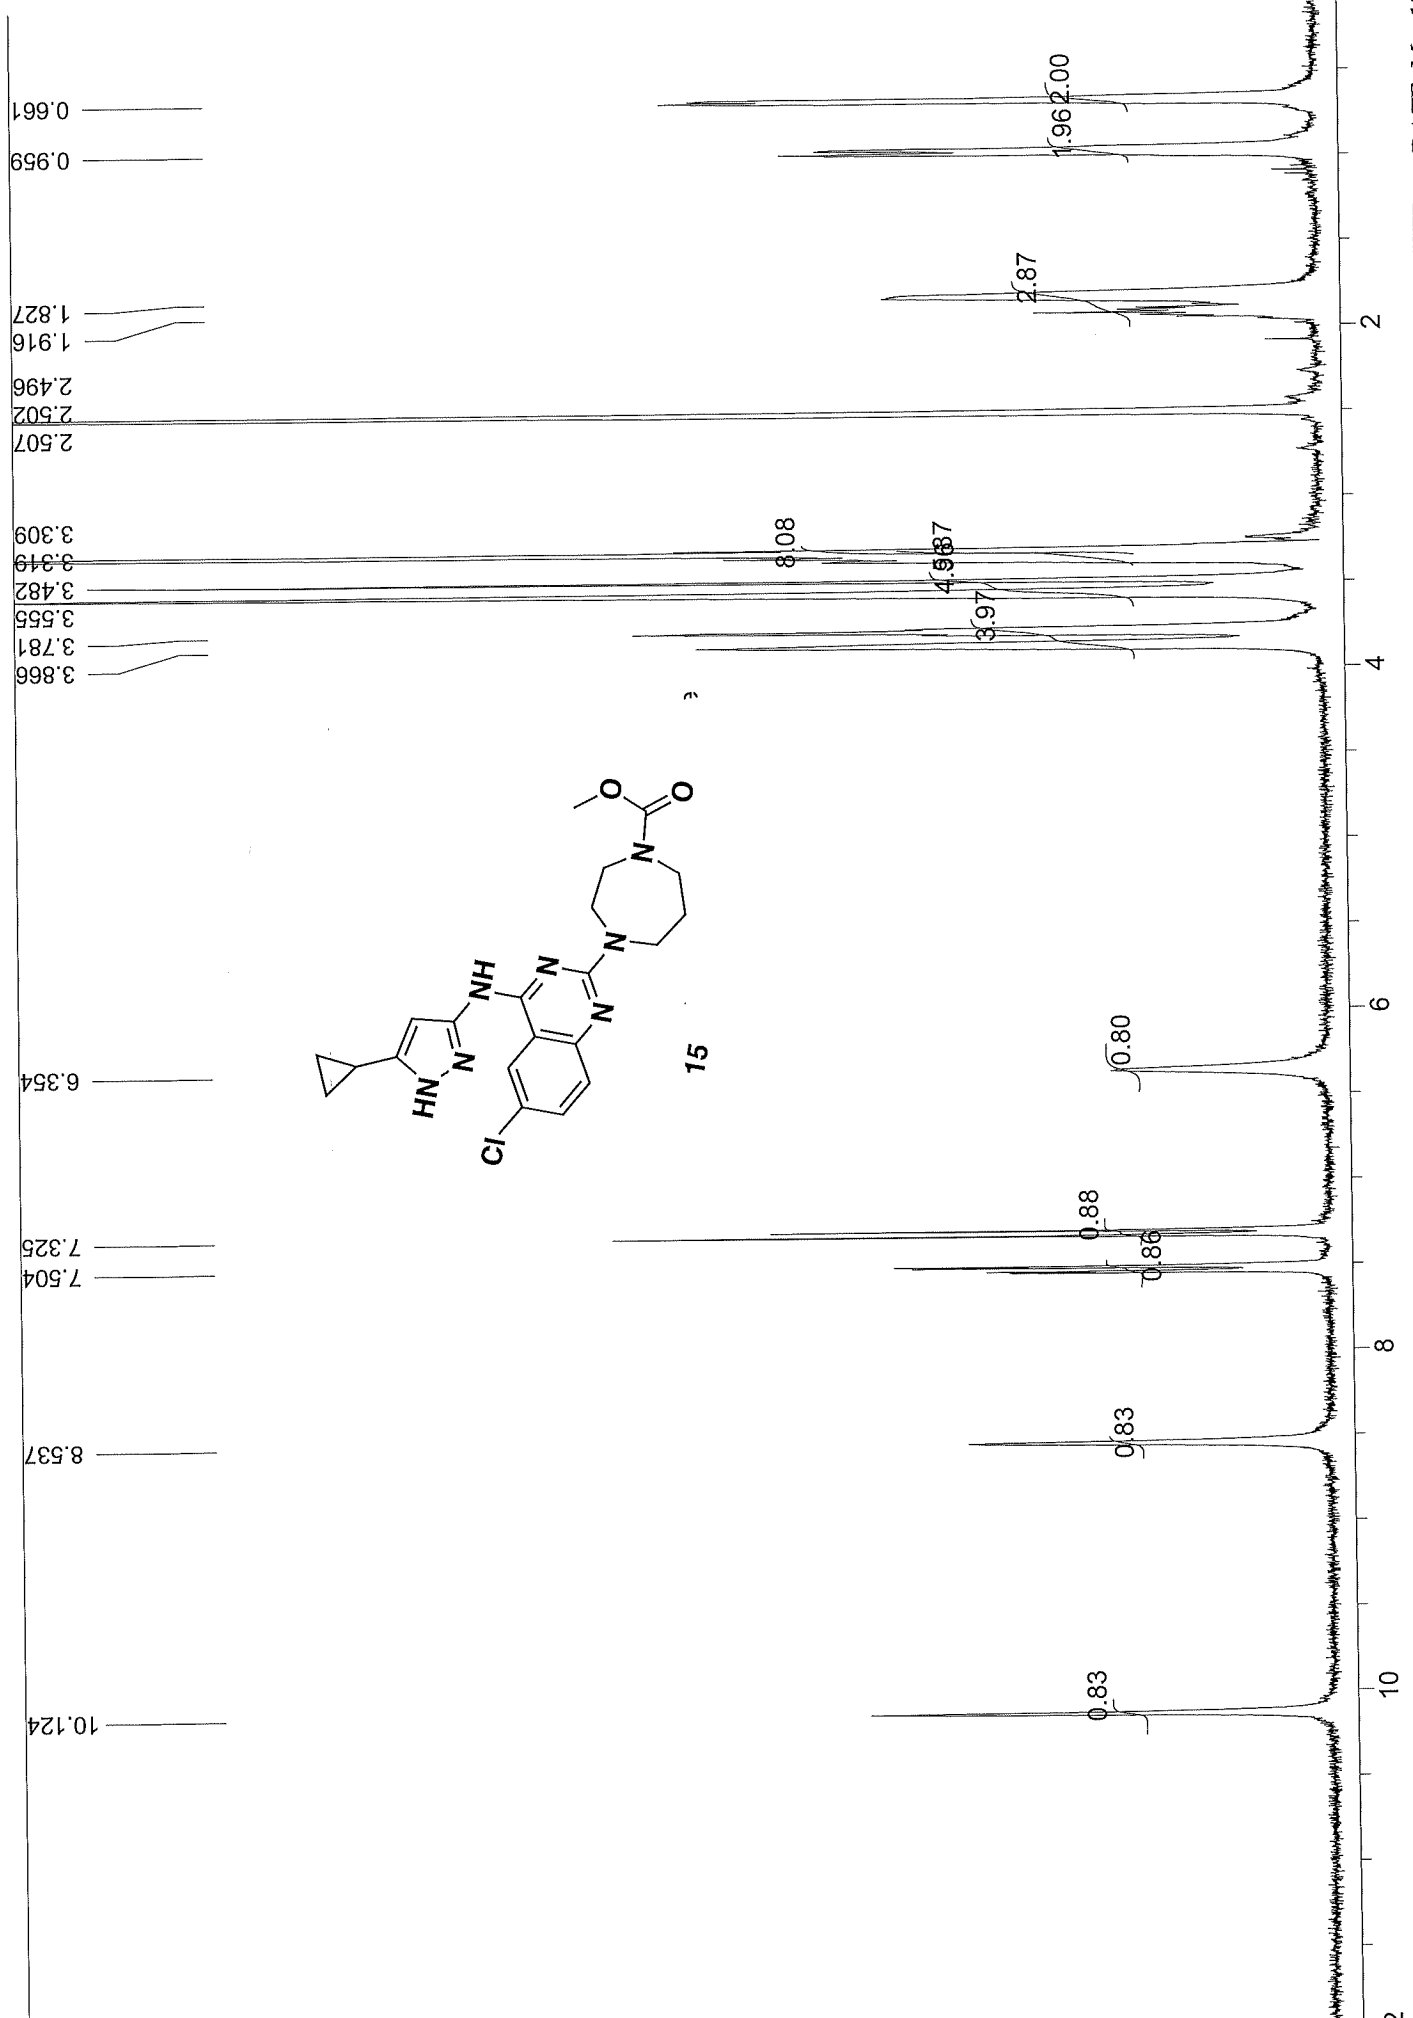

USER: -- DATE: Mar 11

|                          |              |                                       |
|--------------------------|--------------|---------------------------------------|
| RD_1H_OBSERVE:blank line | OF1: 1788.5  | PTSId: 16384                          |
| 4                        | PW: 8.0 usec | Nuts - \$CP-HYC-738-26-A-H1-DMSO-070: |
|                          | PD: 1.0 sec  | LB: 0.0                               |

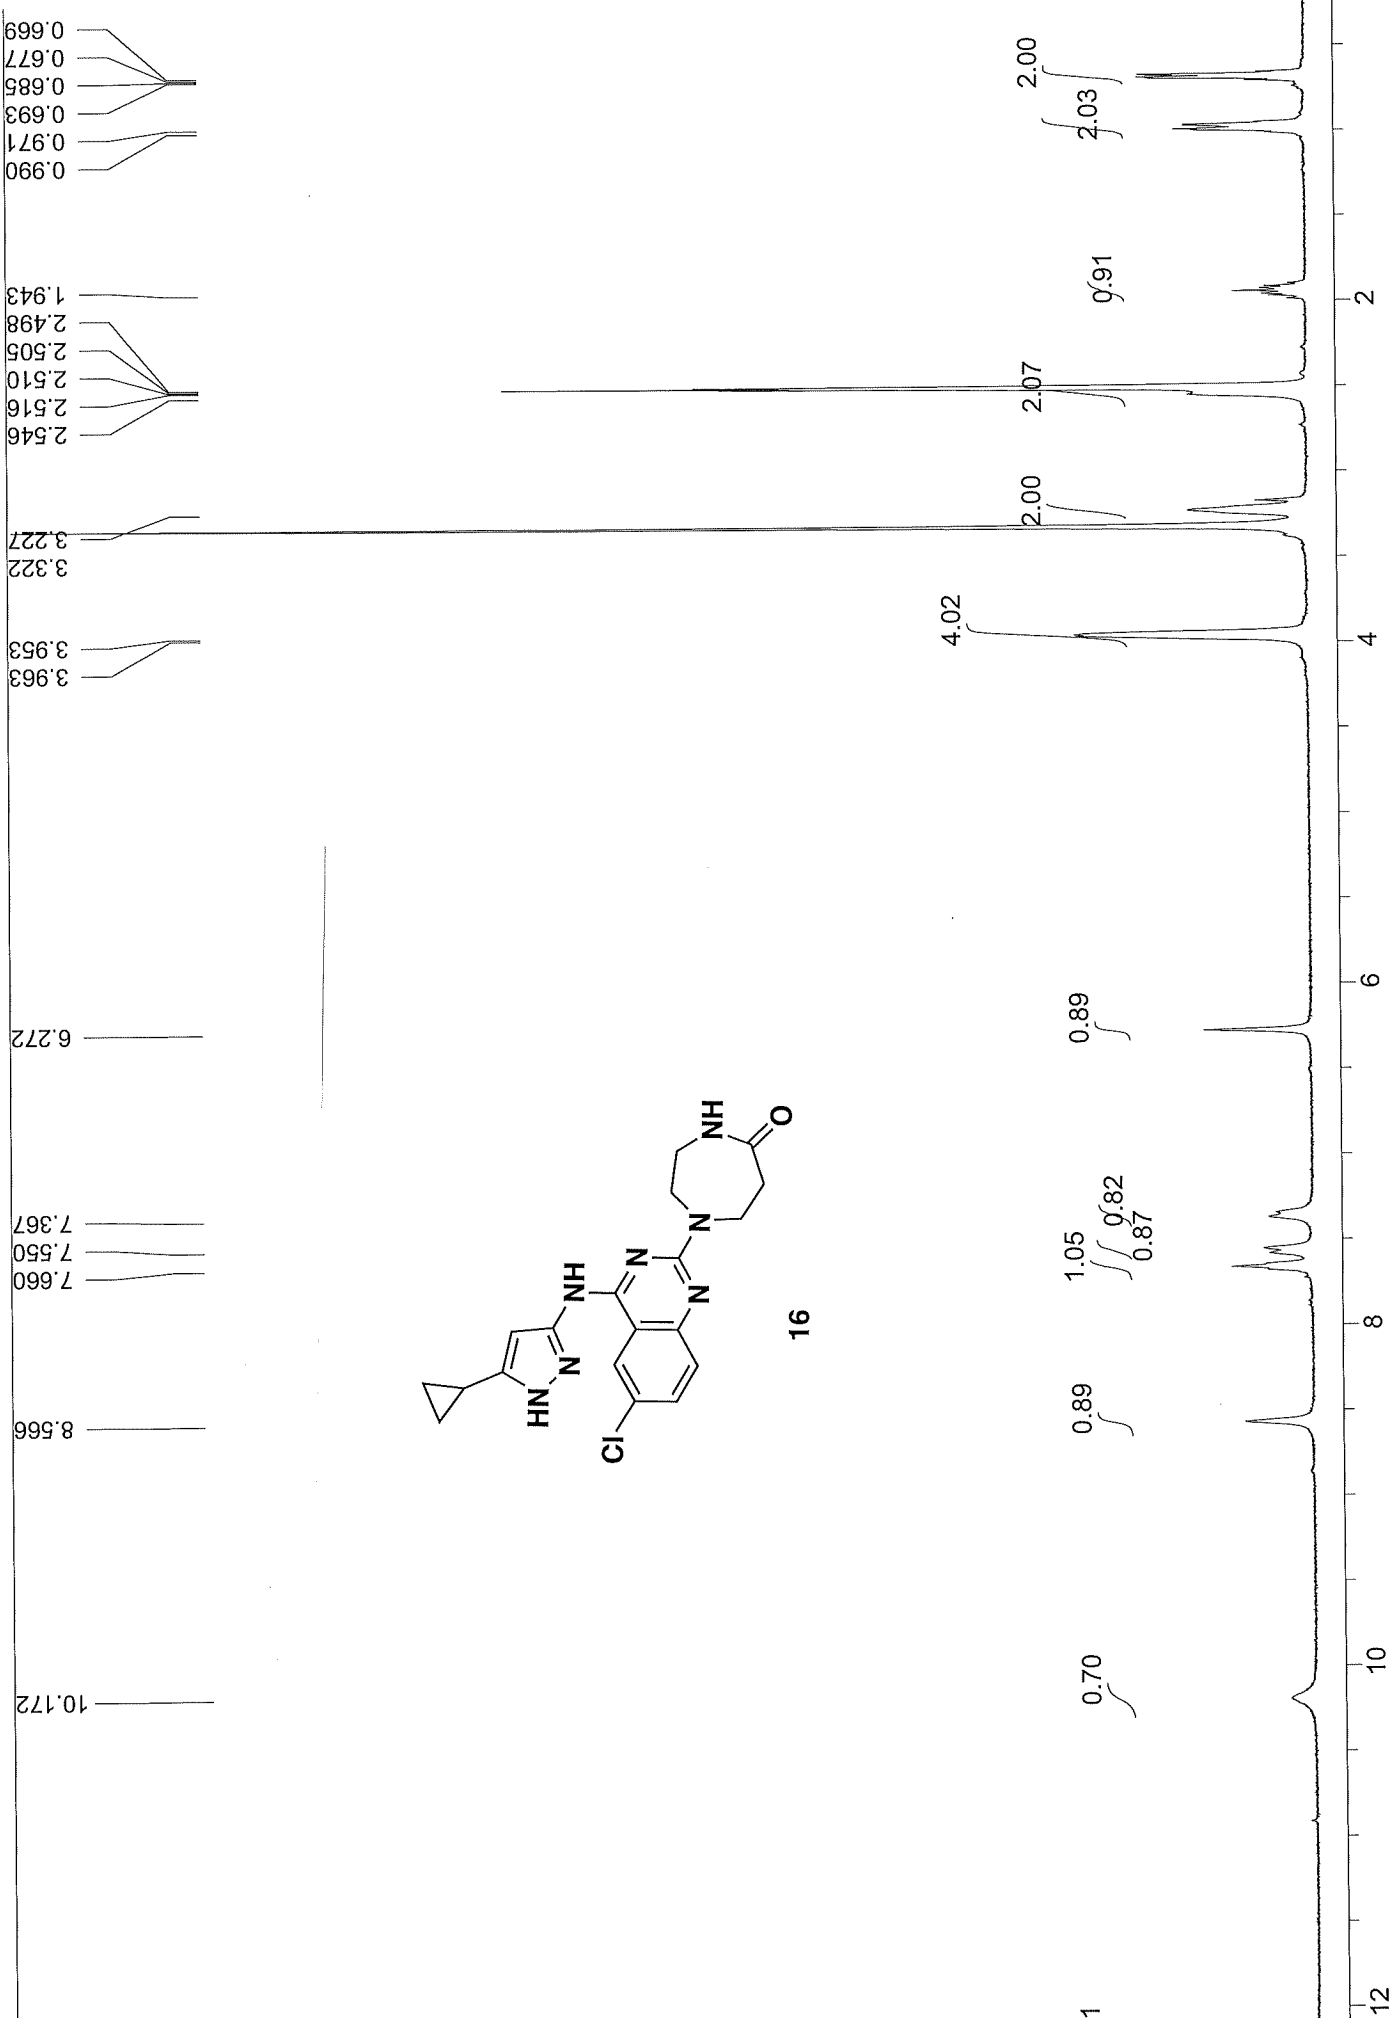

USER: -- DATE: Feb 21

PTS1d: 16384  
Nuts - \$CP-CJG-756-8-A2-H1-DM50-070

LB: 0.0

OF1: 1789.1  
NA: 16

PD: 1.0 sec

SW1: 7987  
PW: 8.0 usec

F2: 75.423

RD 1H OBSERVE: blank line



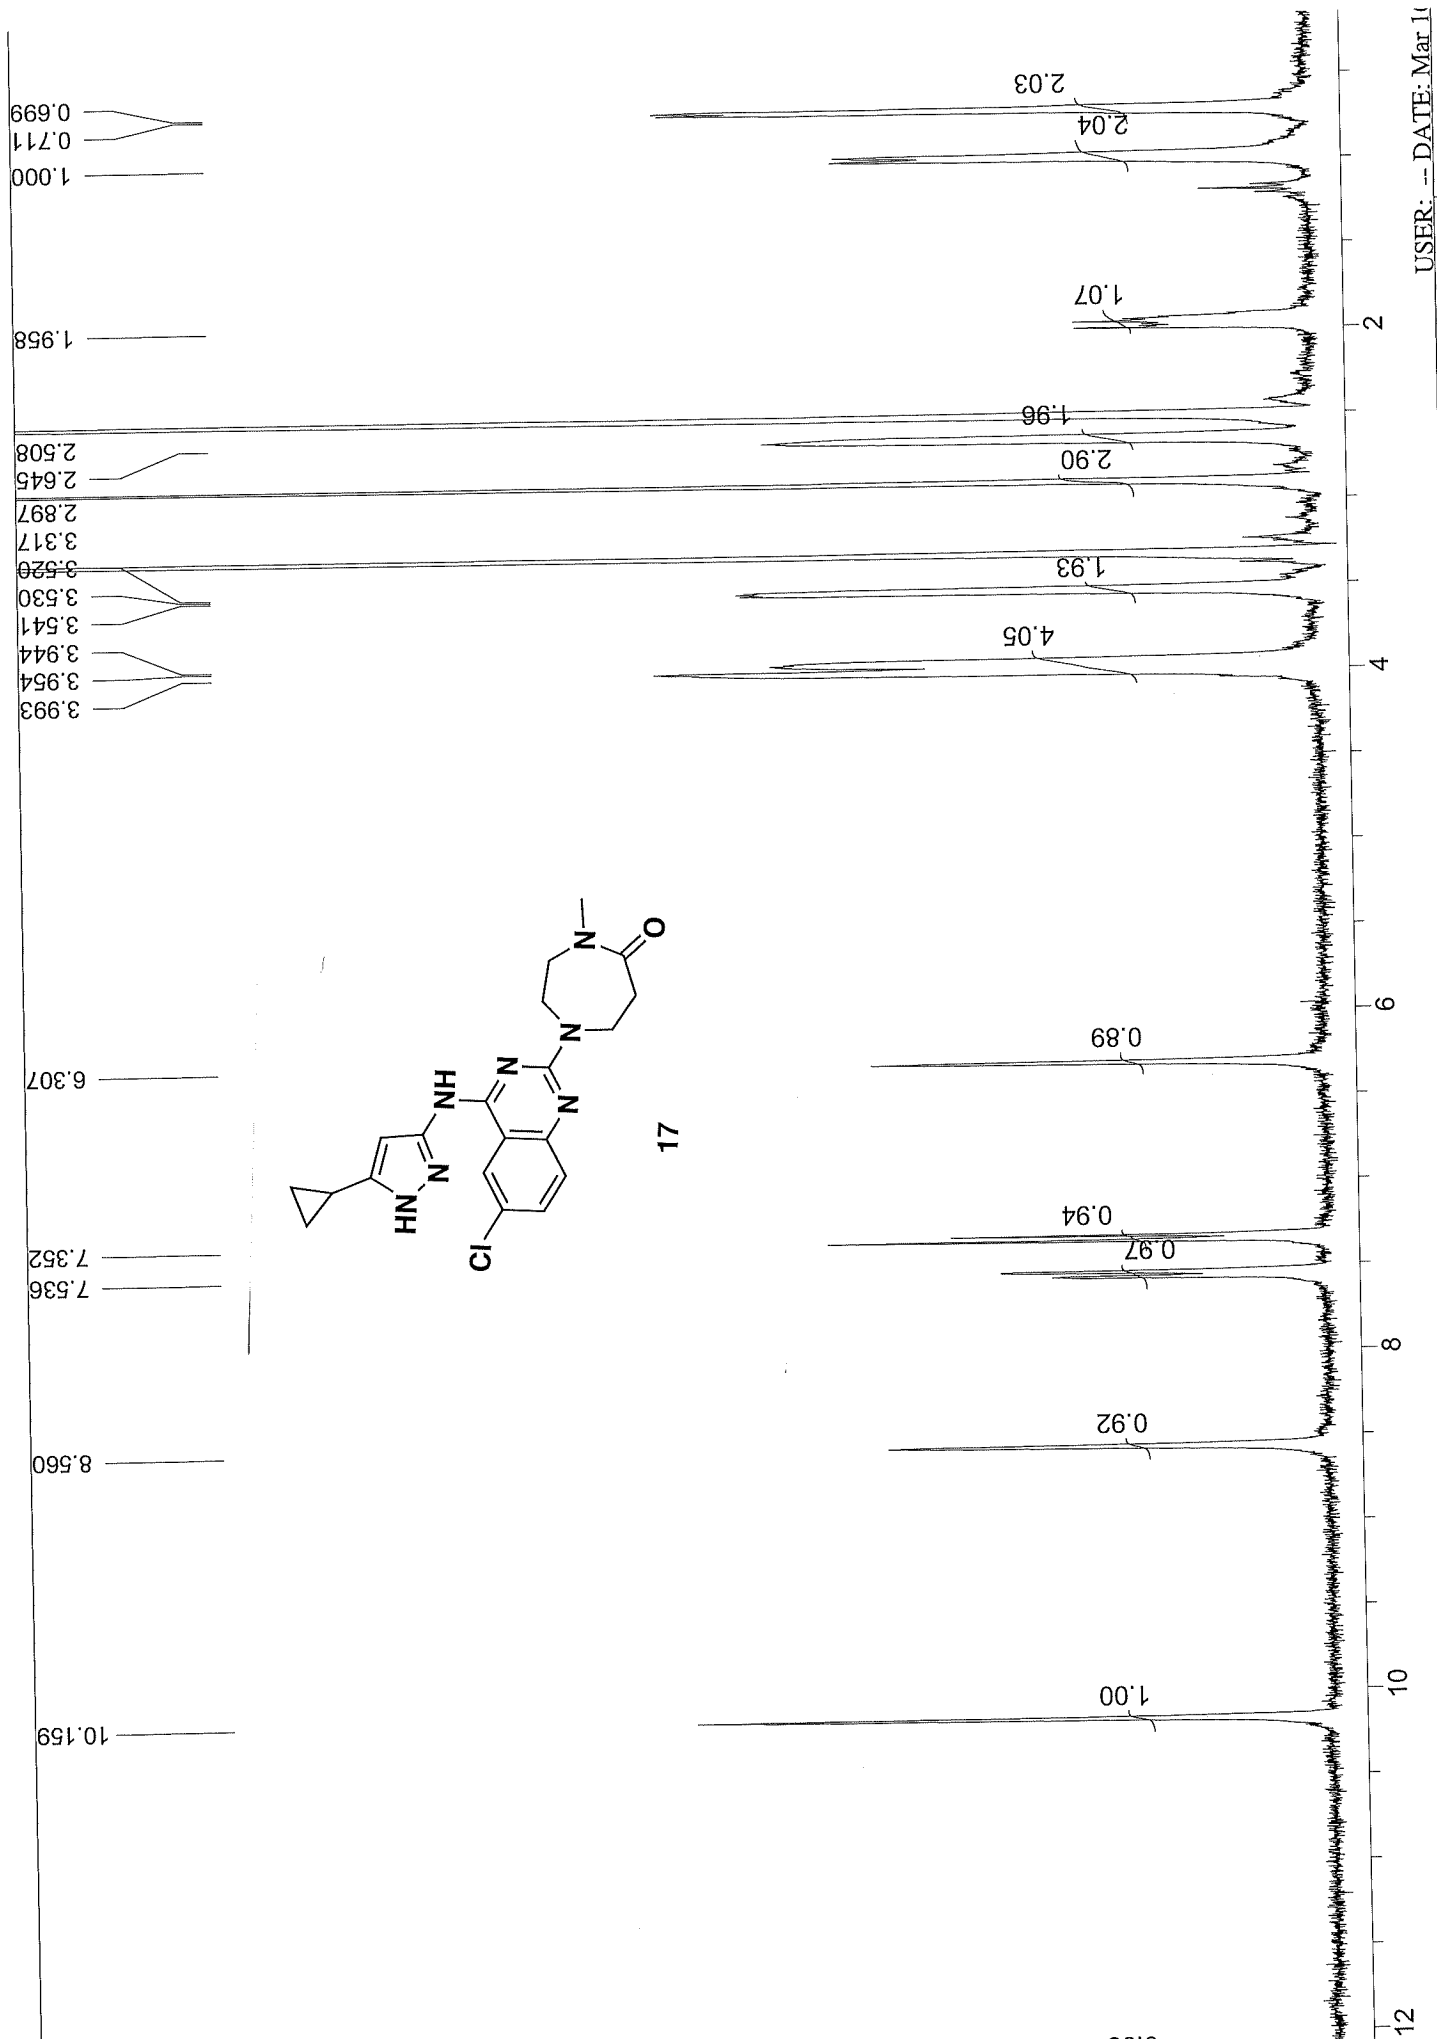

USER: -- DATE: Mar 11

|                                       |             |              |                           |
|---------------------------------------|-------------|--------------|---------------------------|
| PTSD: 16384                           | OF1: 1790.4 | SW1: 7987    | RD_1H OBSERVE: blank line |
| Nuts - \$CP-CJG-756-14-A-HI-DMSO-070: | NA: 8       | PW: 8.0 usec | 24                        |
| LB: 0.0                               | PD: 1.0 sec | F2: 75.423   |                           |

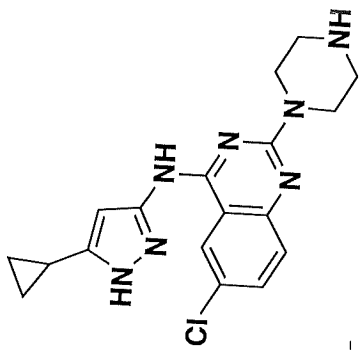

18

$^1\text{H NMR}$  (300 MHz, DMSO)  $\delta$  12.60 (s, 1H), 11.43 (s, 1H), 9.42 (s, 1H), 8.79 (s, 2H), 8.79 (s, 1H), 7.98 (s, 1H), 7.89 (s, 1H), 6.31 (s, 1H), 4.16 (s, 4H), 3.29 (s, 4H), 1.98 (ddd,  $J = 13.4, 8.6, 5.1$  Hz, 1H), 1.03 - 0.90 (m, 2H), 0.83 - 0.62 (m, 2H).

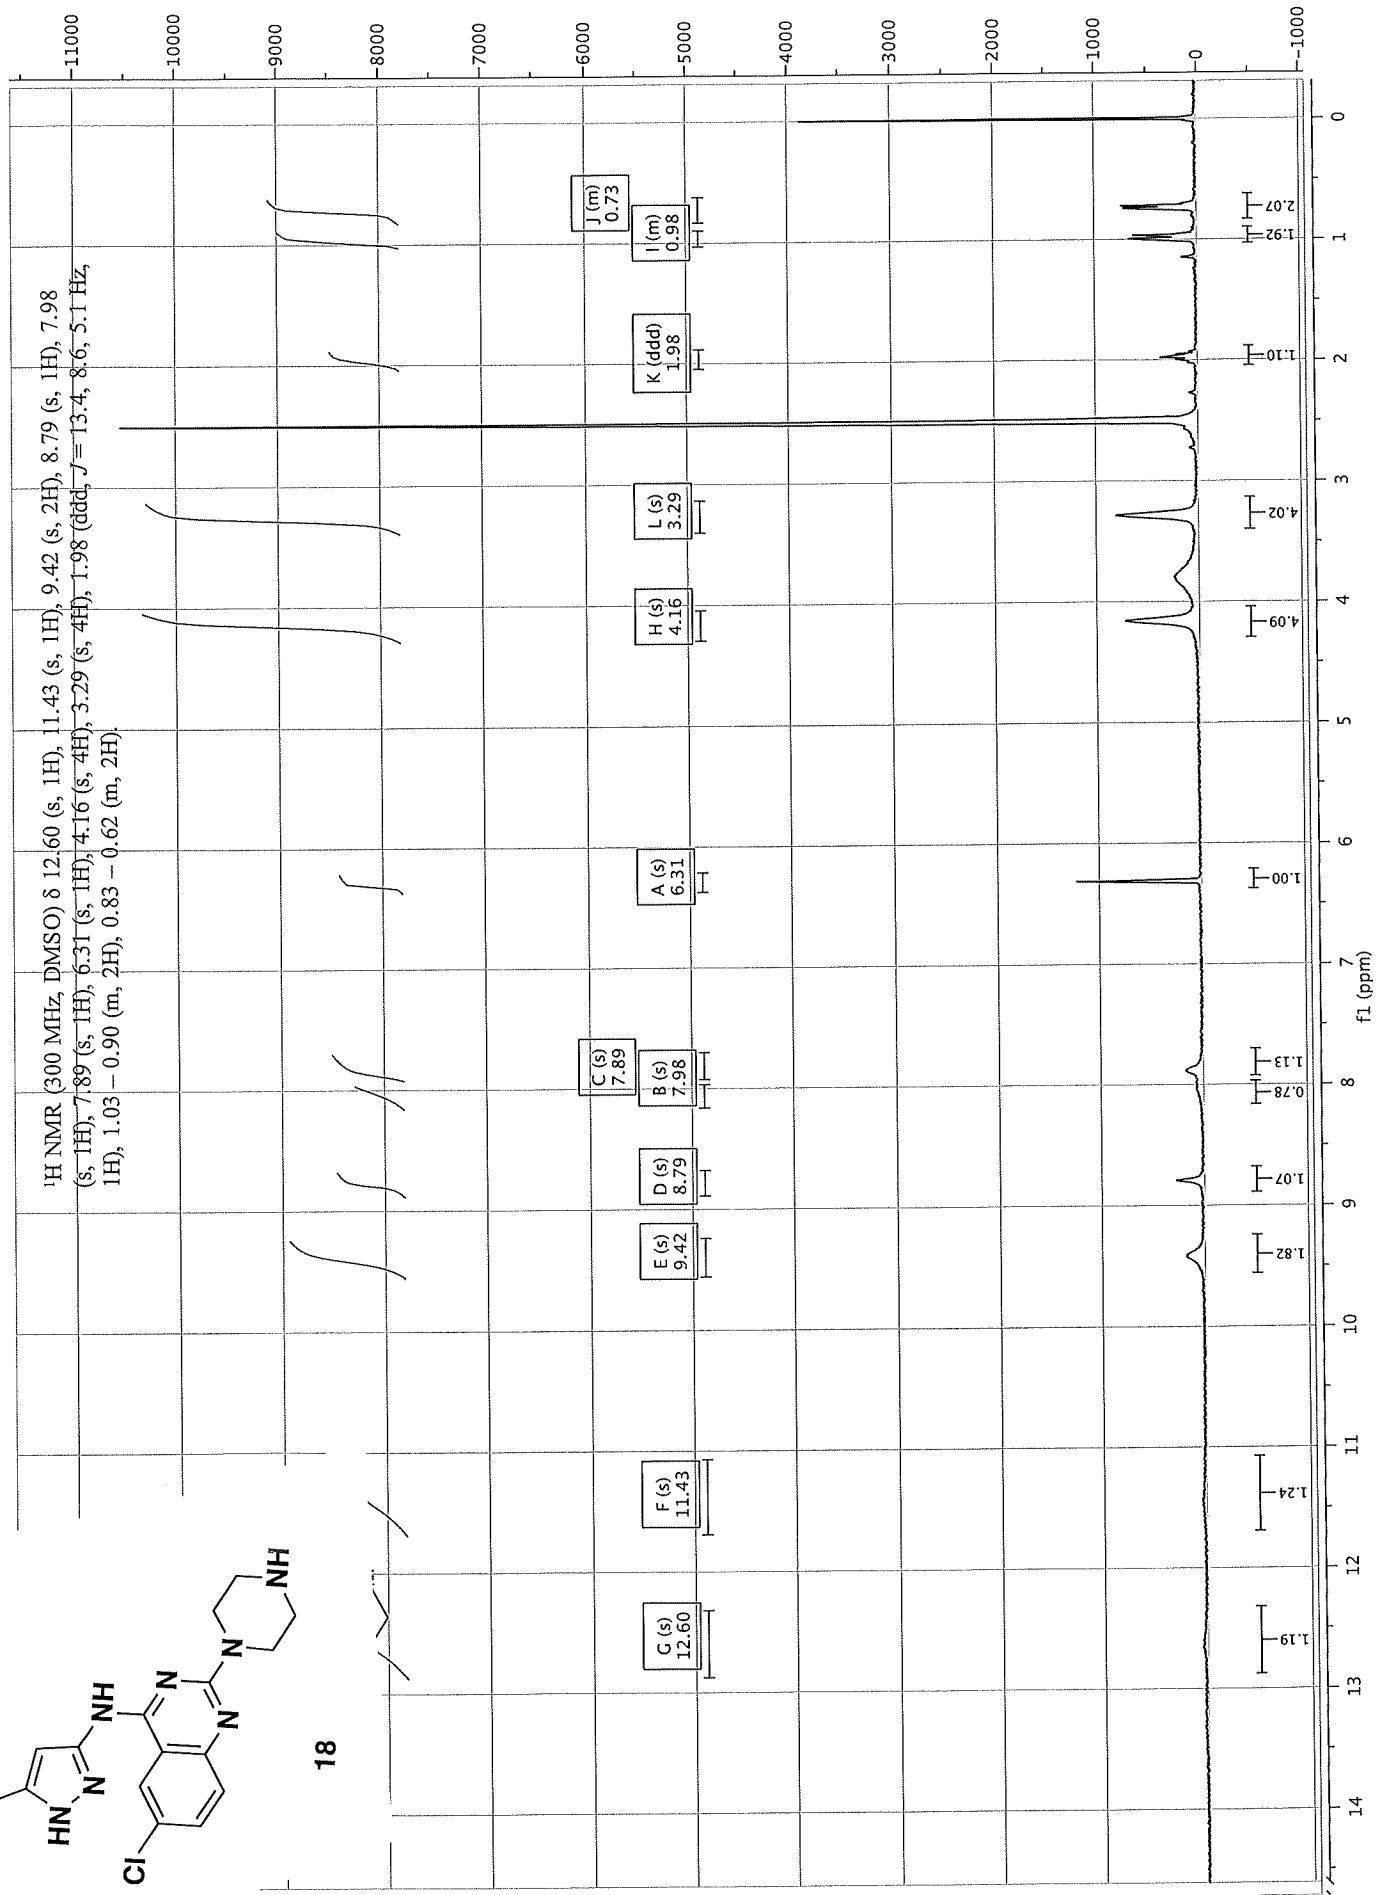

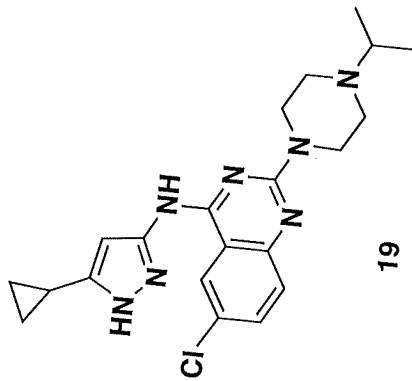

19

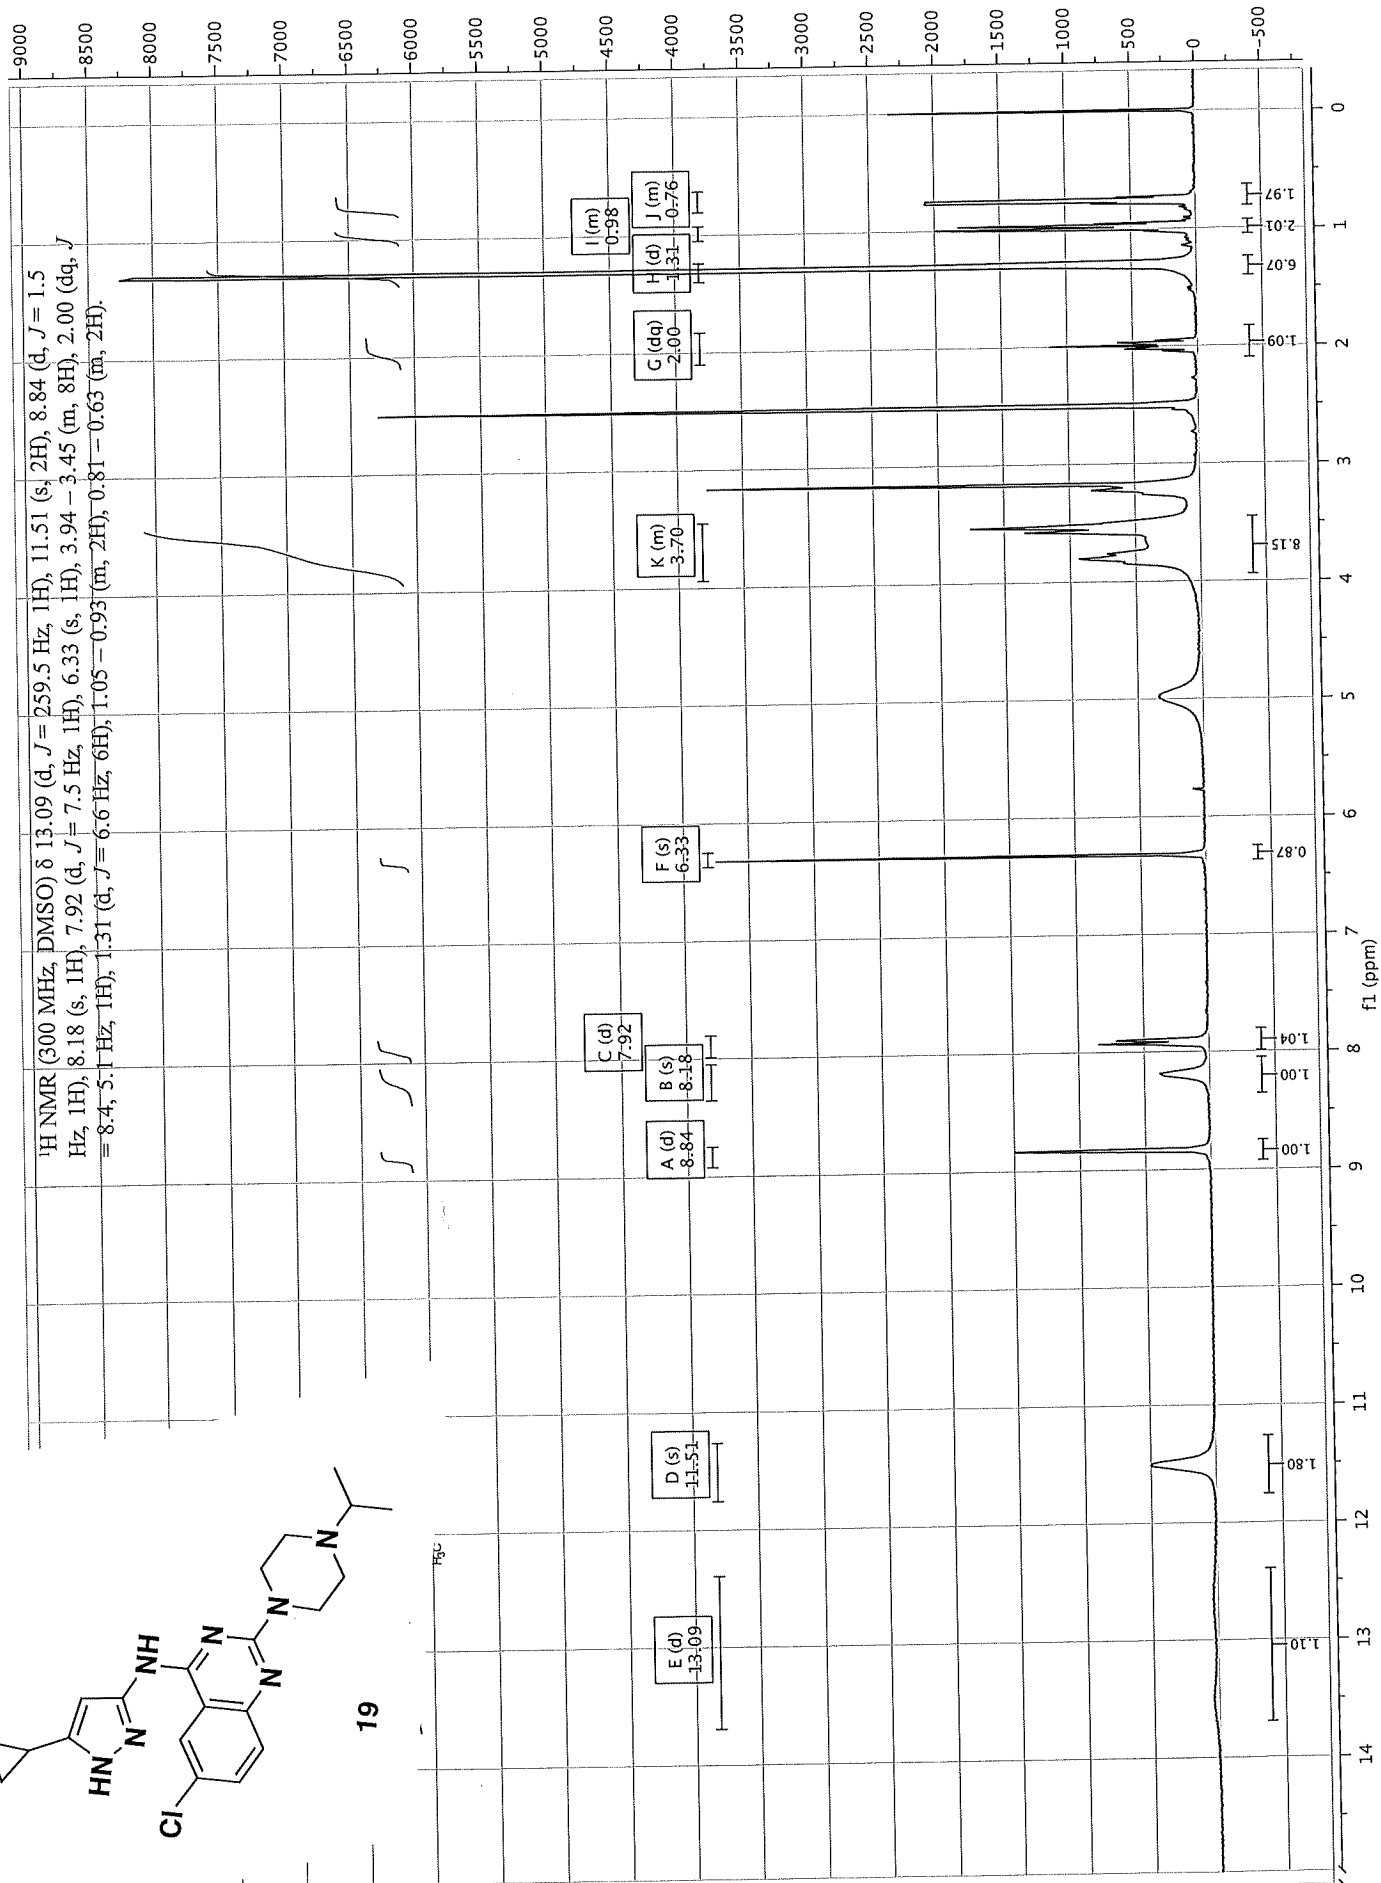

Oct14-2015

19  
A\_PROTON DMSO (Z:\Topsin) TW 88

<sup>1</sup>H NMR (300 MHz, DMSO) δ 0.71 (d, *J* = 3.7 Hz, 2H), 0.96 (d, *J* = 6.5 Hz, 2H), 2.04 - 1.87 (m, 1H), 3.56 (s, 4H), 4.04 (s, 4H), 6.34 (s, 1H); 7.60--7.43 (m, 5H); 7.89 (d, *J* = 8.4 Hz, 1H); 8.05 (s, 1H); 8.81 (s, 1H), 11.46 (s, 1H), 12.60 (s, 1H), 12.96 (s, 1H).

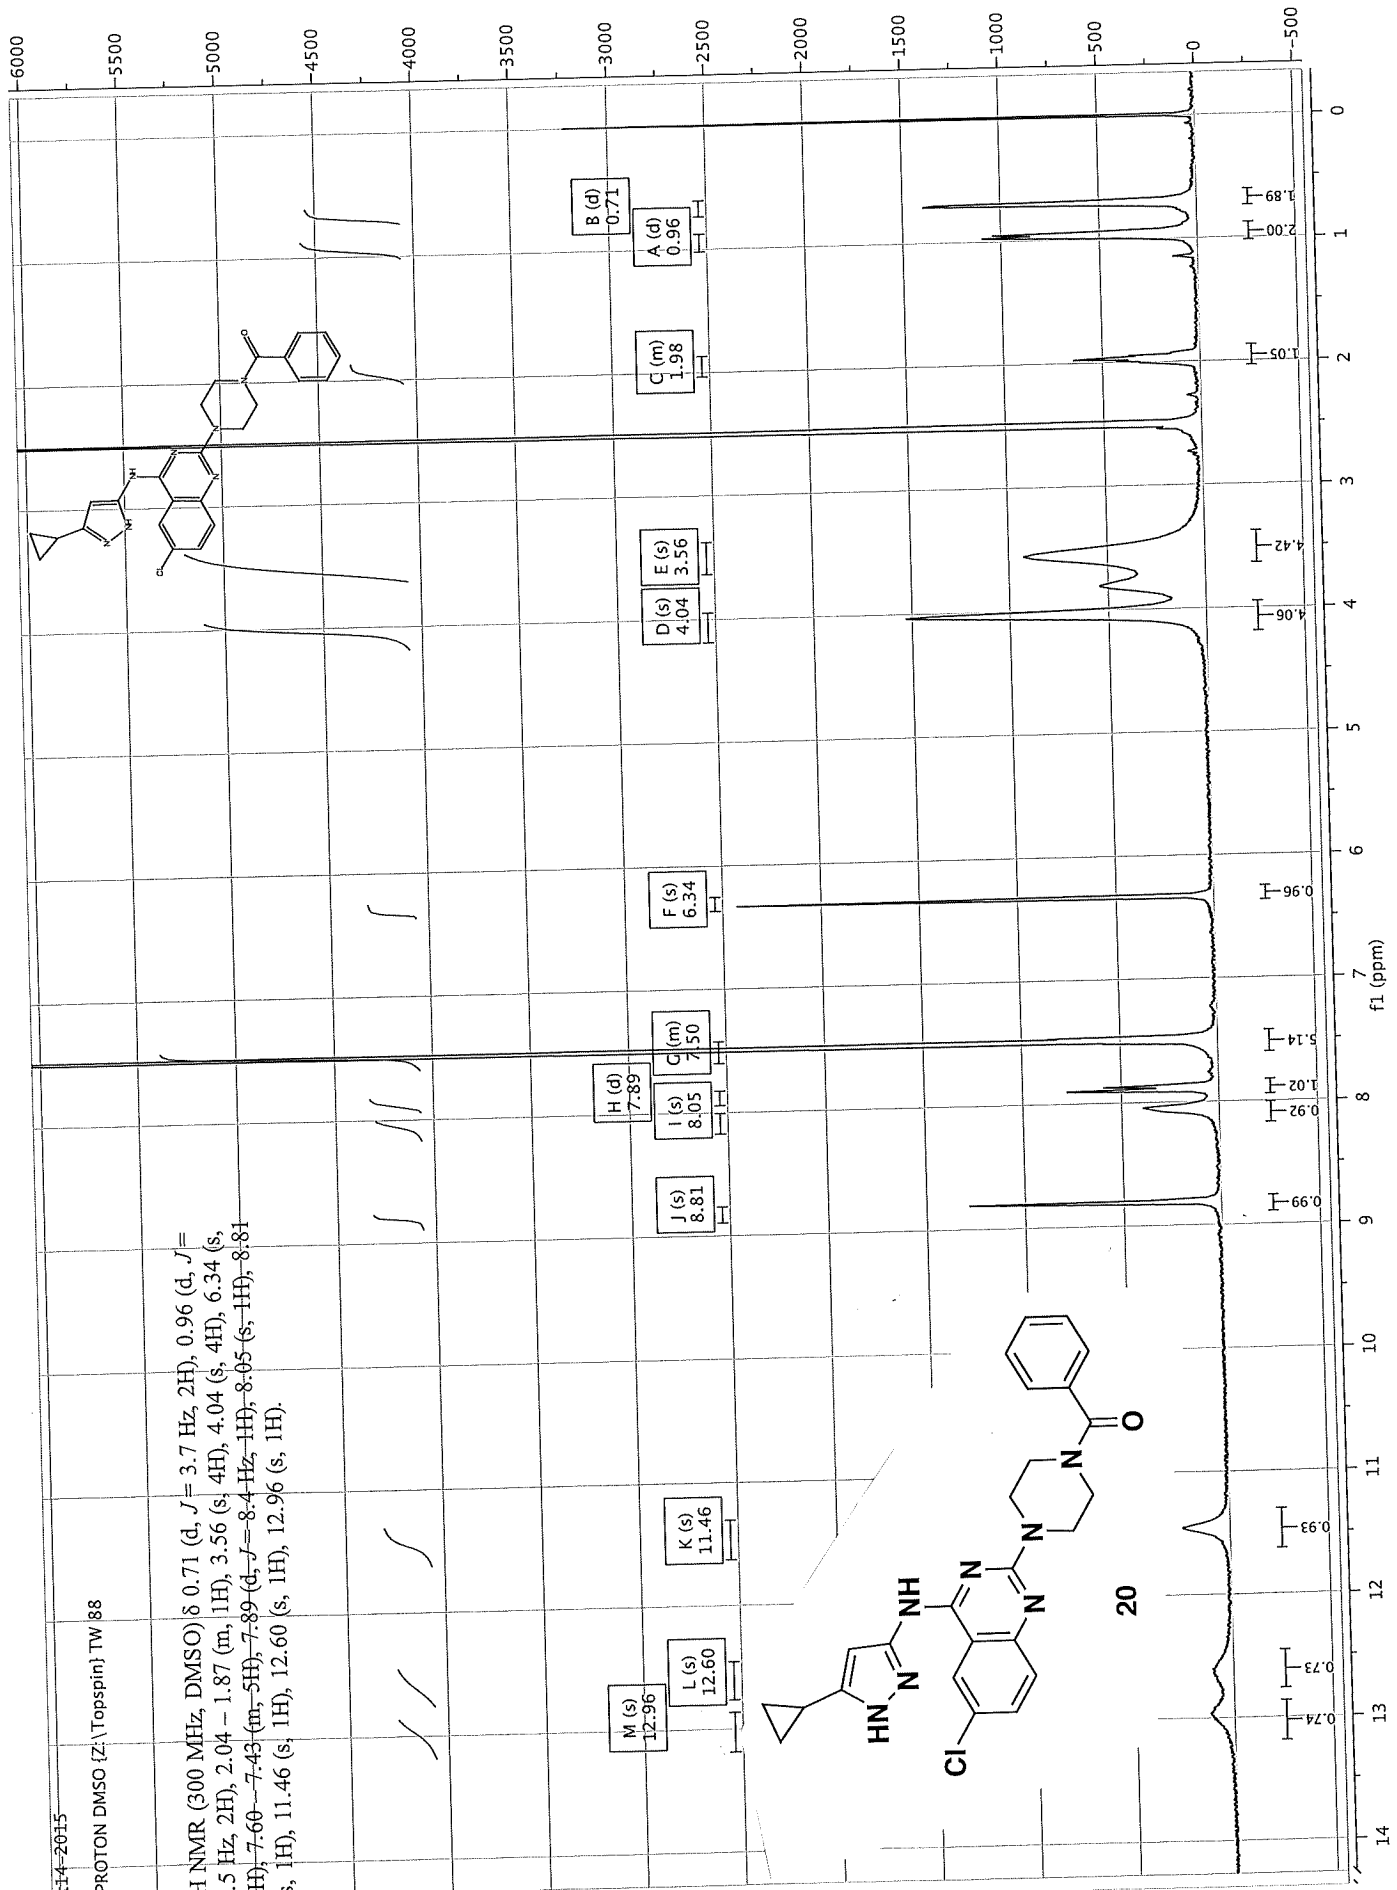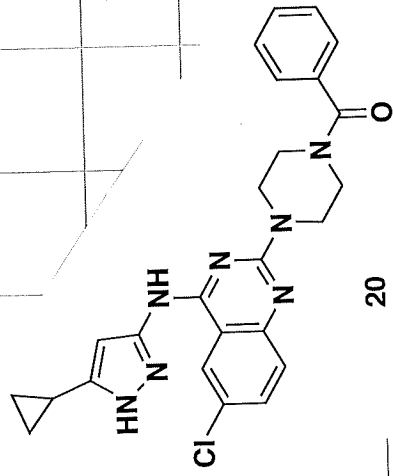

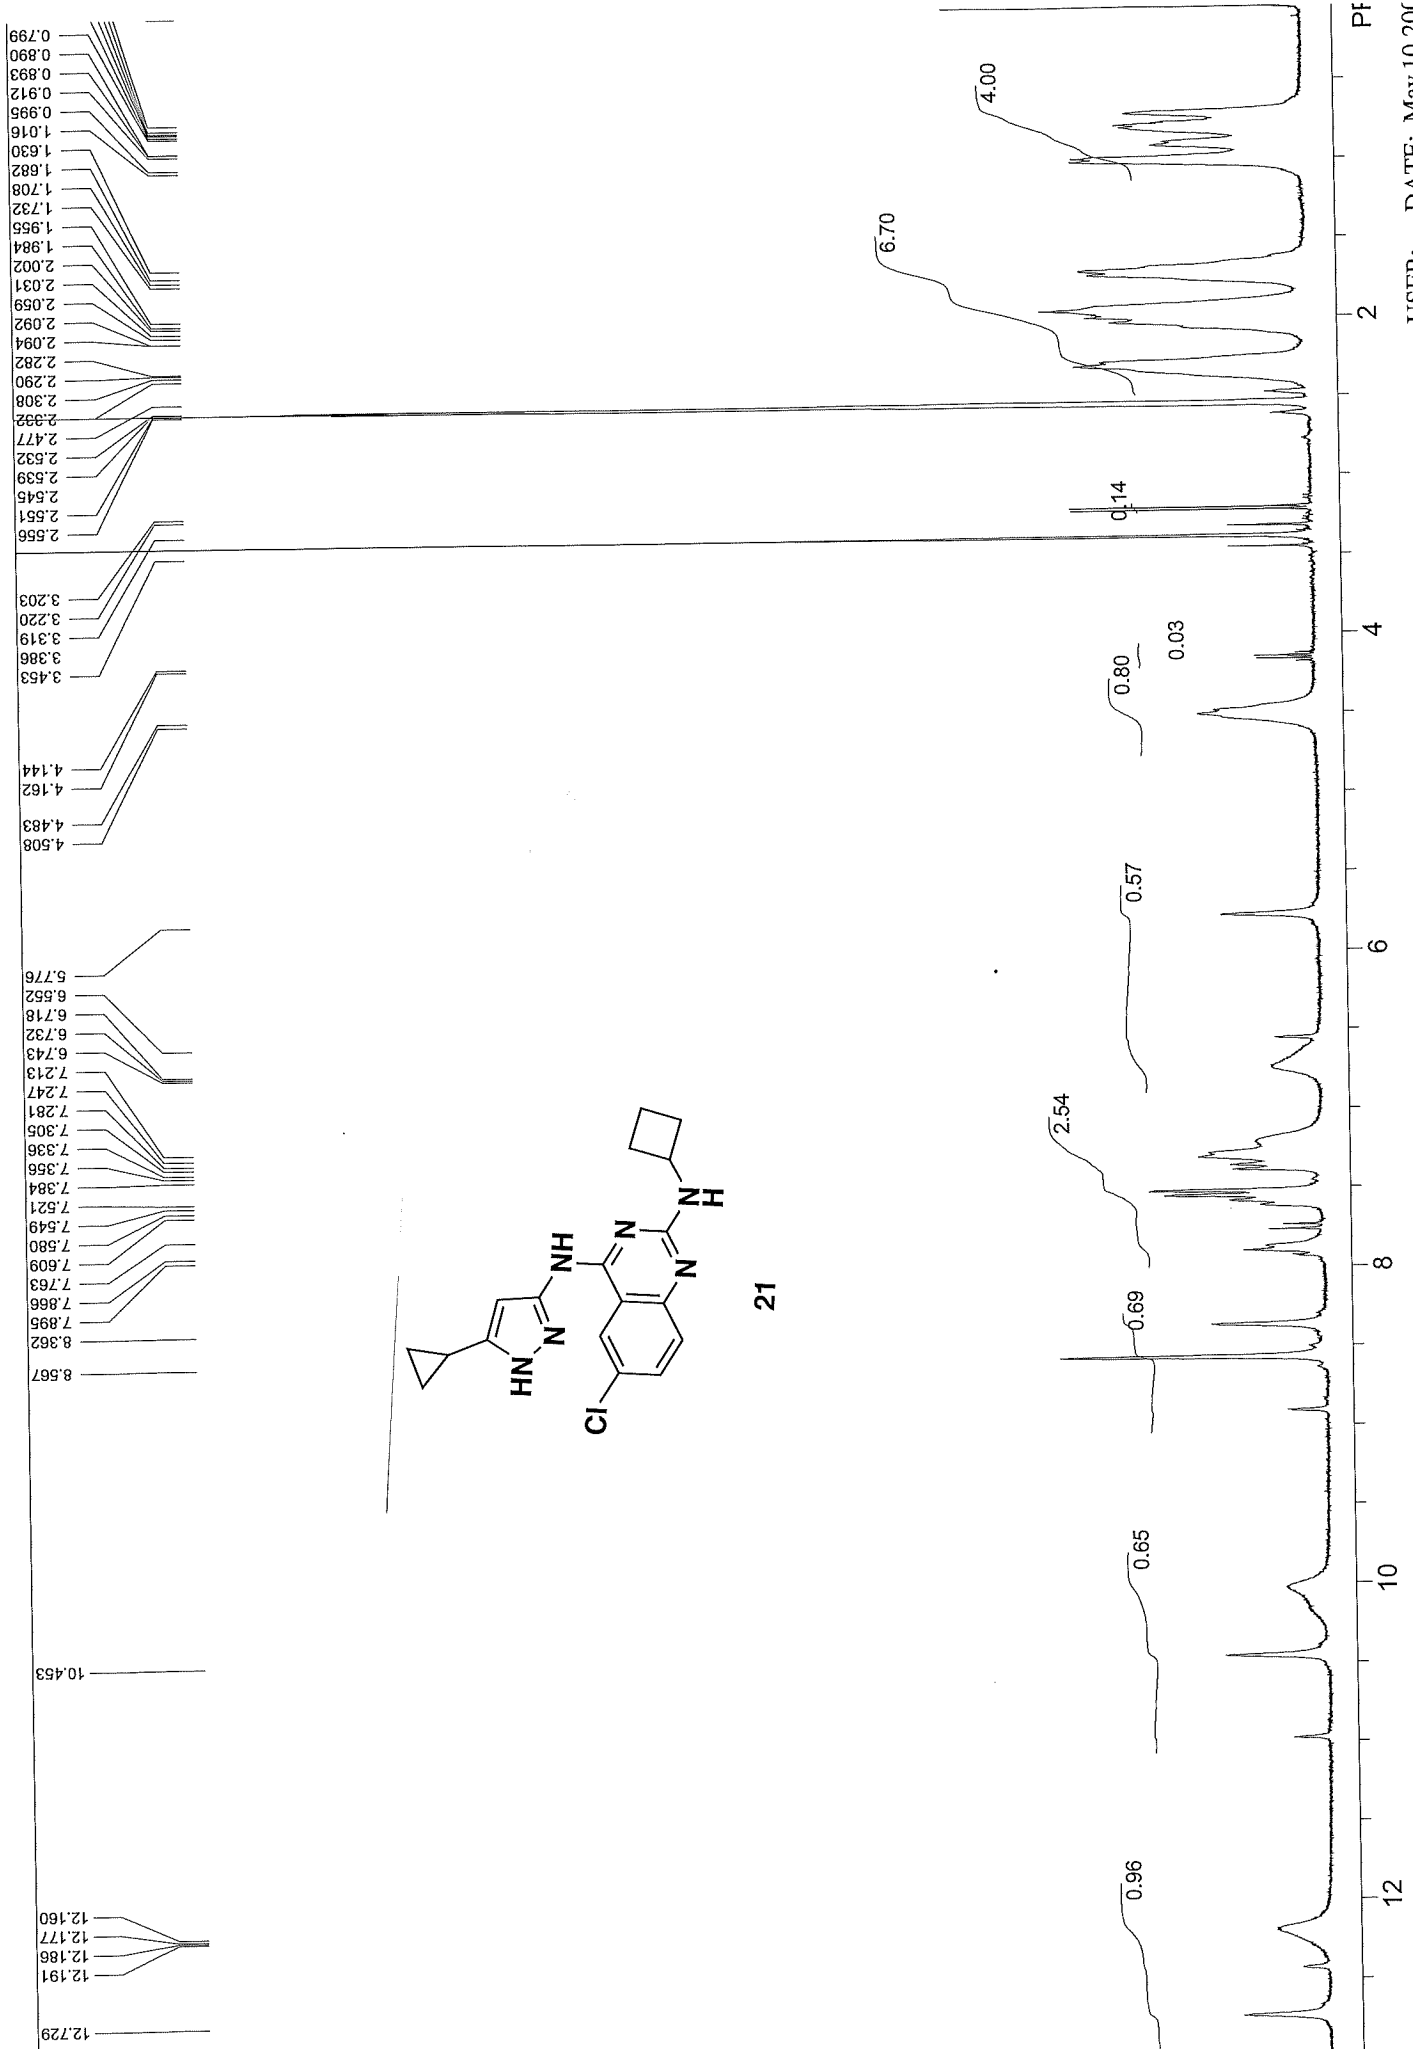

ANDARD 1H OBSERVE

299.918 SW1: 4.803 F2: 75.421

12.729 : s2pul PW: 6.2 usec PD: 1.0 sec

OFI: 1818.7

NA: 16

LB: 0.0

WmNuts - \$CP-IXM-856-26-HI-DMSO-070510.f

PTSId: 16384

USER: -- DATE: May 10 200

12.295 10.502 8.831 8.442 8.426 8.415 8.409 7.818 7.524 7.518 7.506 7.500 6.666 6.662

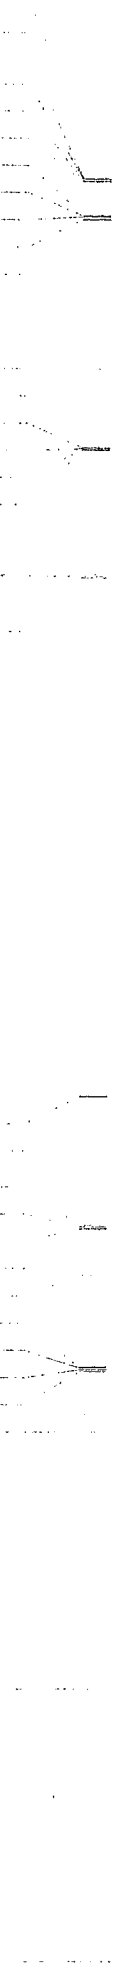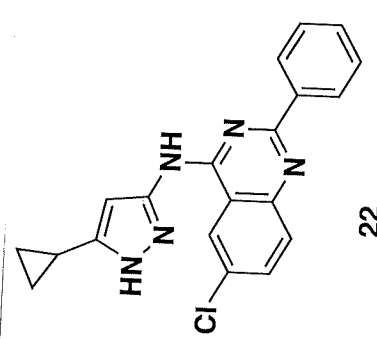

22

|                                                                                                                                                                                                                   |    |   |   |   |   |       |
|-------------------------------------------------------------------------------------------------------------------------------------------------------------------------------------------------------------------|----|---|---|---|---|-------|
| 12                                                                                                                                                                                                                | 10 | 8 | 6 | 4 | 2 | 0 PPM |
| USER: -- DATE: Jun 18 2007<br>PTS1d: 16384<br>Nuts - \$CP-LXL735-79-H1-DMSO-070618.fid<br>OF1: 1799.5<br>NA: 16<br>LB: 0.0<br>PD: 1.0 sec<br>SW1: 7987<br>PW: 6.2 usec<br>F2: 75.421<br>RD 1H OBSERVE: blank line |    |   |   |   |   |       |

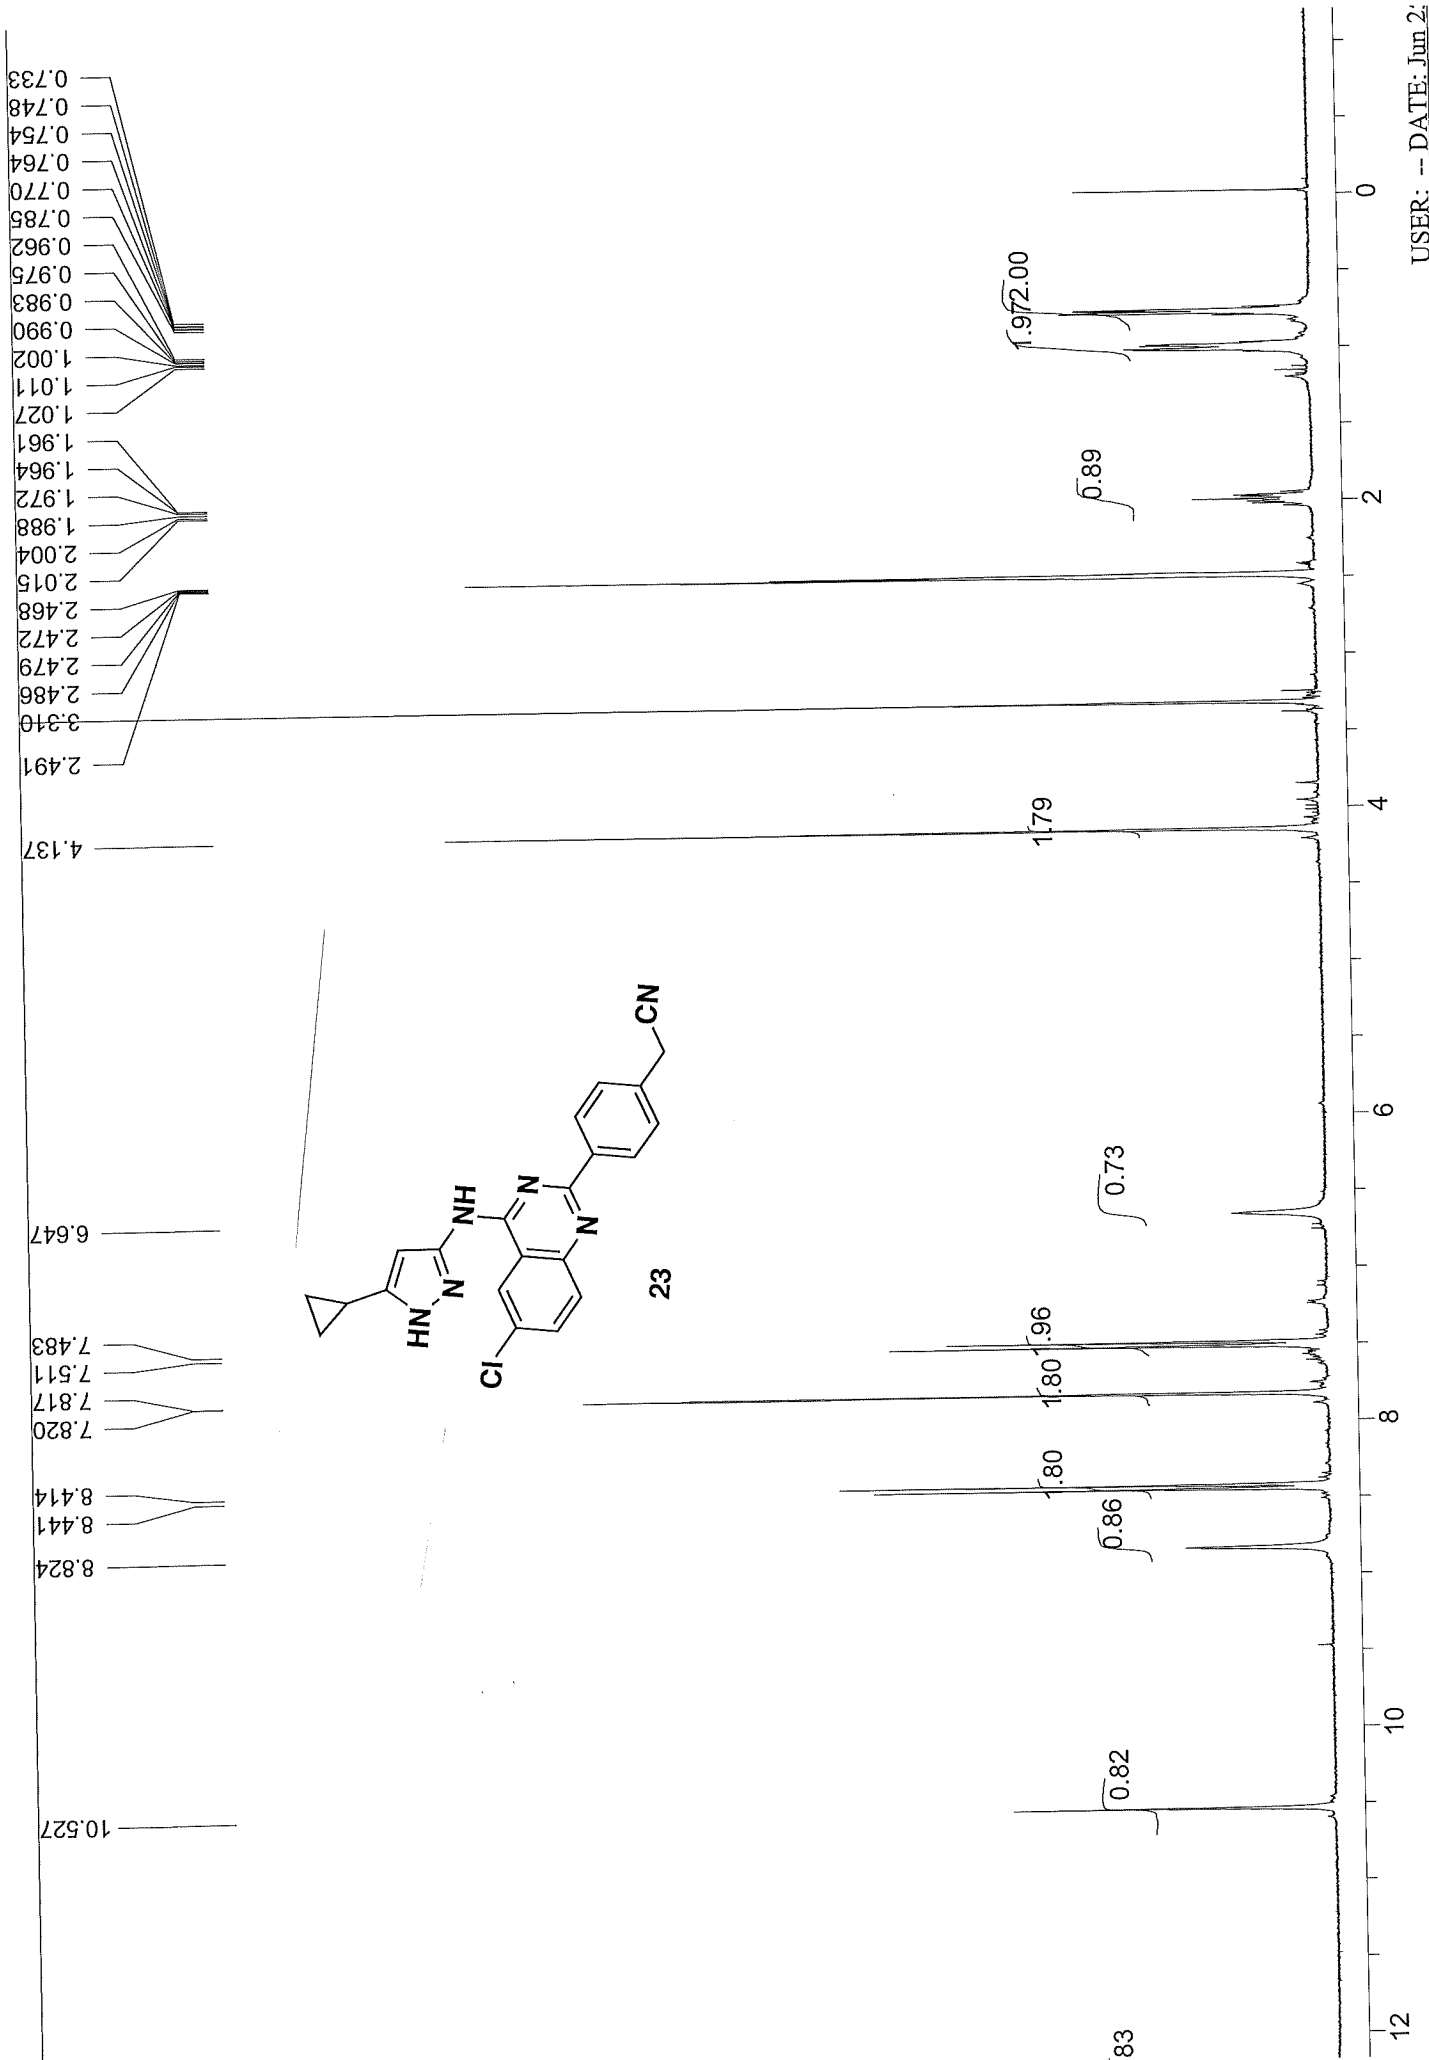

DARD IH OBSERVE:blank line  
 1918 F2: 75.421  
 ptl  
 SW1: 7987  
 PW: 6.2 usec  
 OF1: 1799.5  
 NA: 8  
 LB: 0.0  
 Nluts - SCP-LXL-735-86-H1-DMSO-0704  
 PTSId: 16384  
 USER: -- DATE: Jun 2:

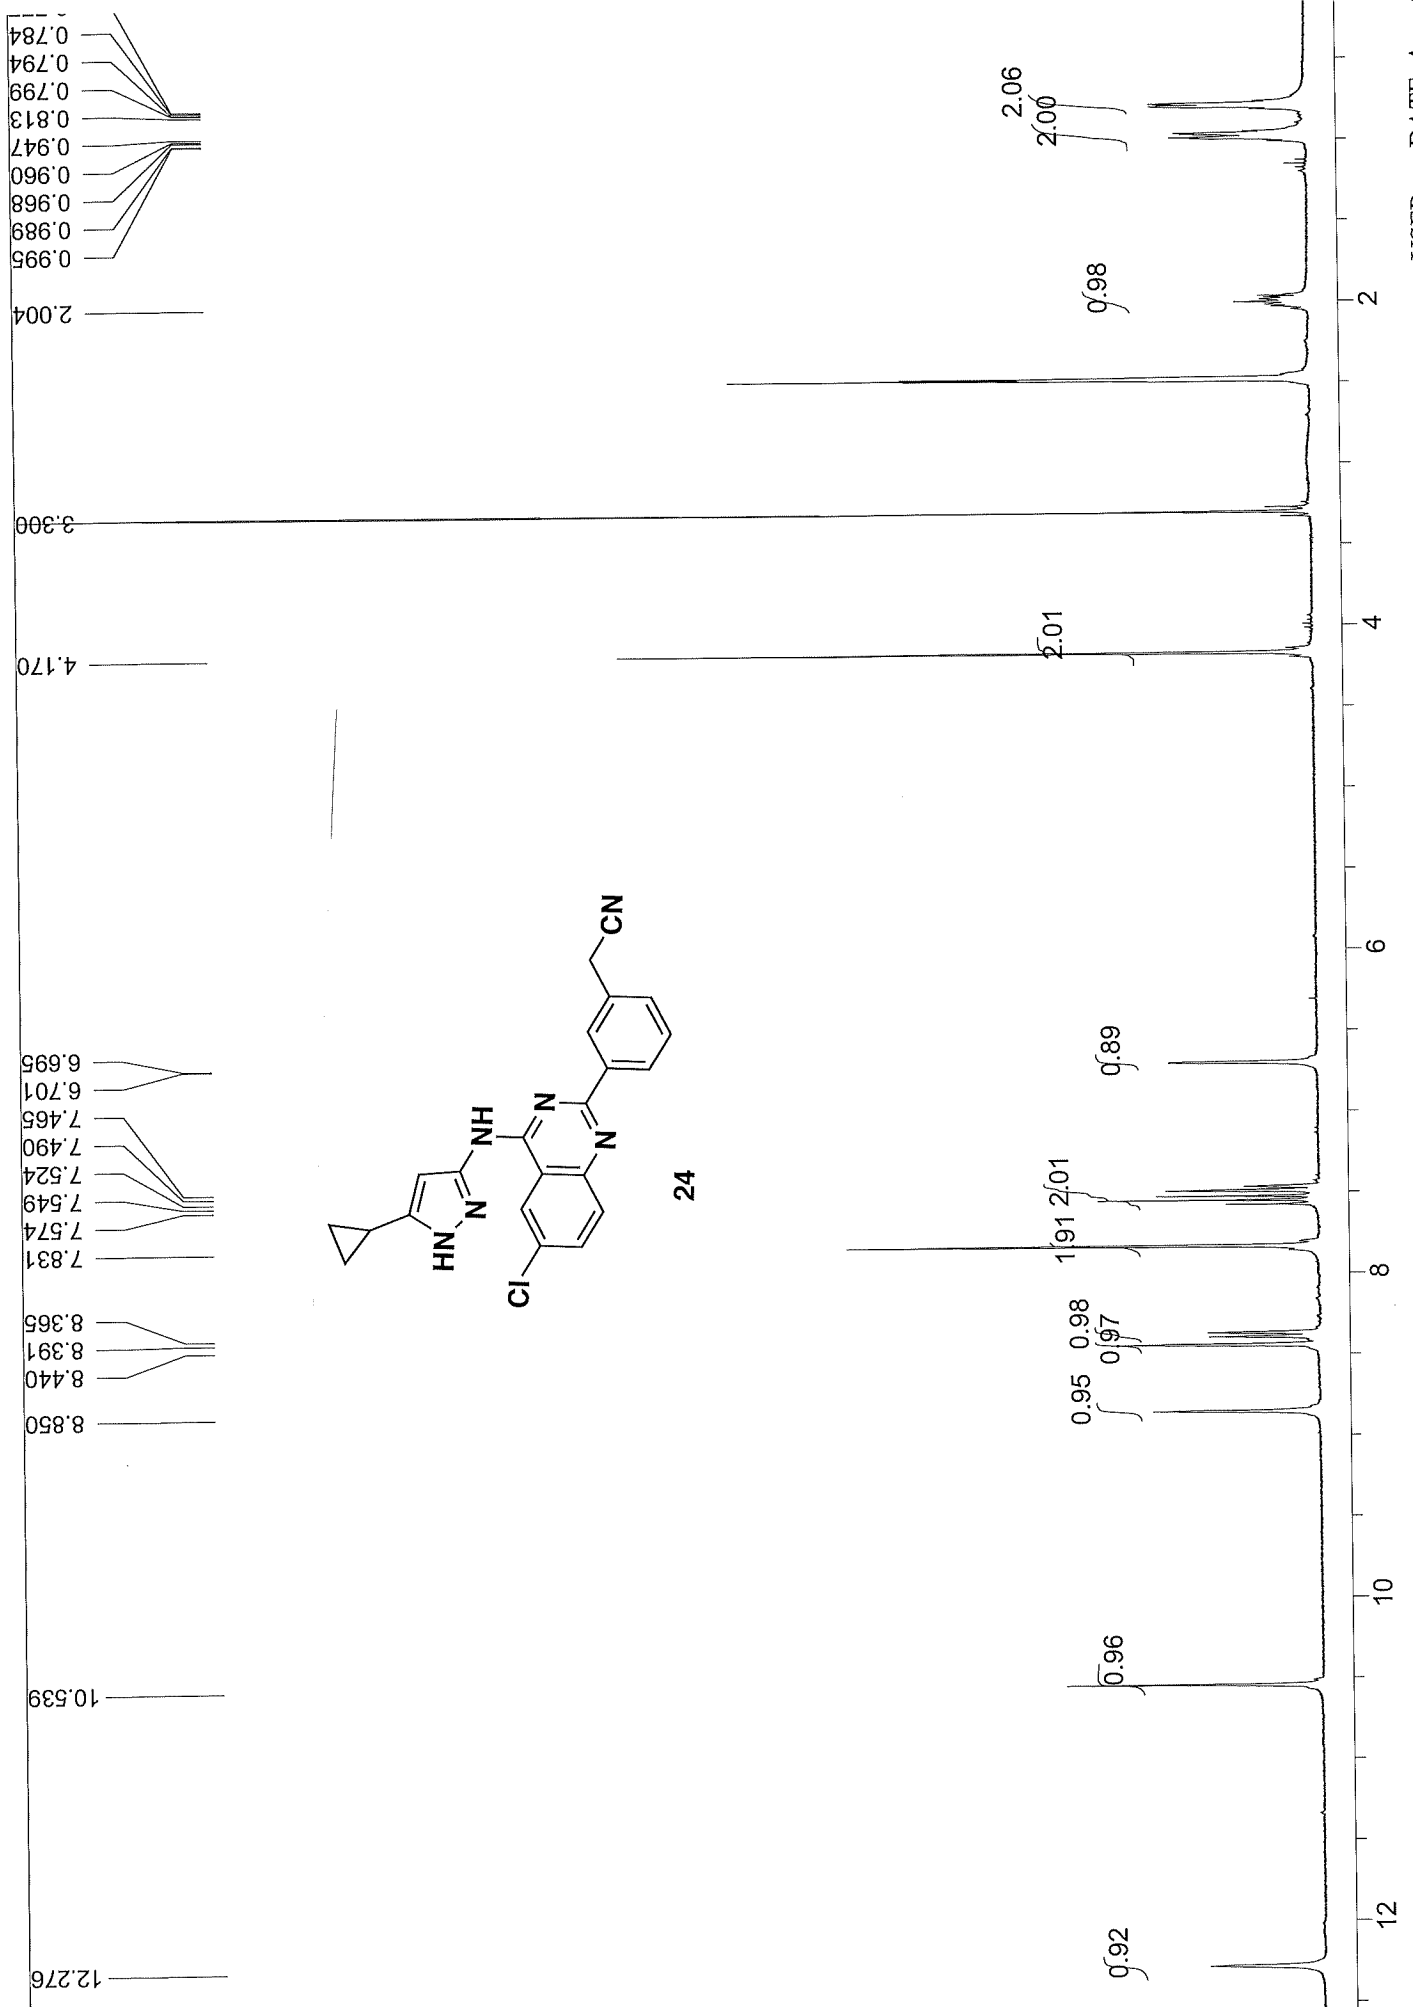

USER: -- DATE: Aug 1  
 PTS1d: 16384  
 OF1: 1800.1  
 NA: 16  
 LB: 0.0  
 PD: 1.0 sec  
 SW1: 4803  
 PW: 4.5 usec  
 F2: 75.463  
 Nuts - SCP-LXL-735-119-H1-DMSO-0708067  
 pul

DARD 1H OBSERVE:blank line



10.606  
8.820  
8.690  
8.687  
8.678  
8.672  
8.667  
7.979  
7.976  
7.970  
7.954  
7.949  
7.944  
7.830  
7.753  
7.727  
7.698  
6.571  
6.564  
3.316  
3.134  
2.492  
2.487  
2.481  
2.474  
2.469  
1.991  
1.979  
1.964  
1.945  
1.934  
1.038  
1.022  
1.015  
1.001  
0.994  
0.987  
0.975  
0.809  
0.795  
0.789  
0.778  
0.772

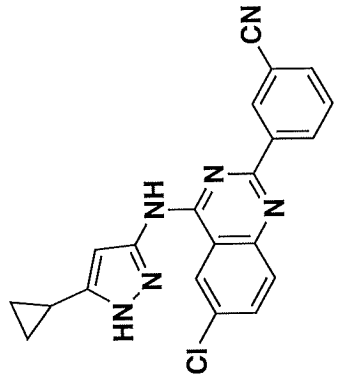

25

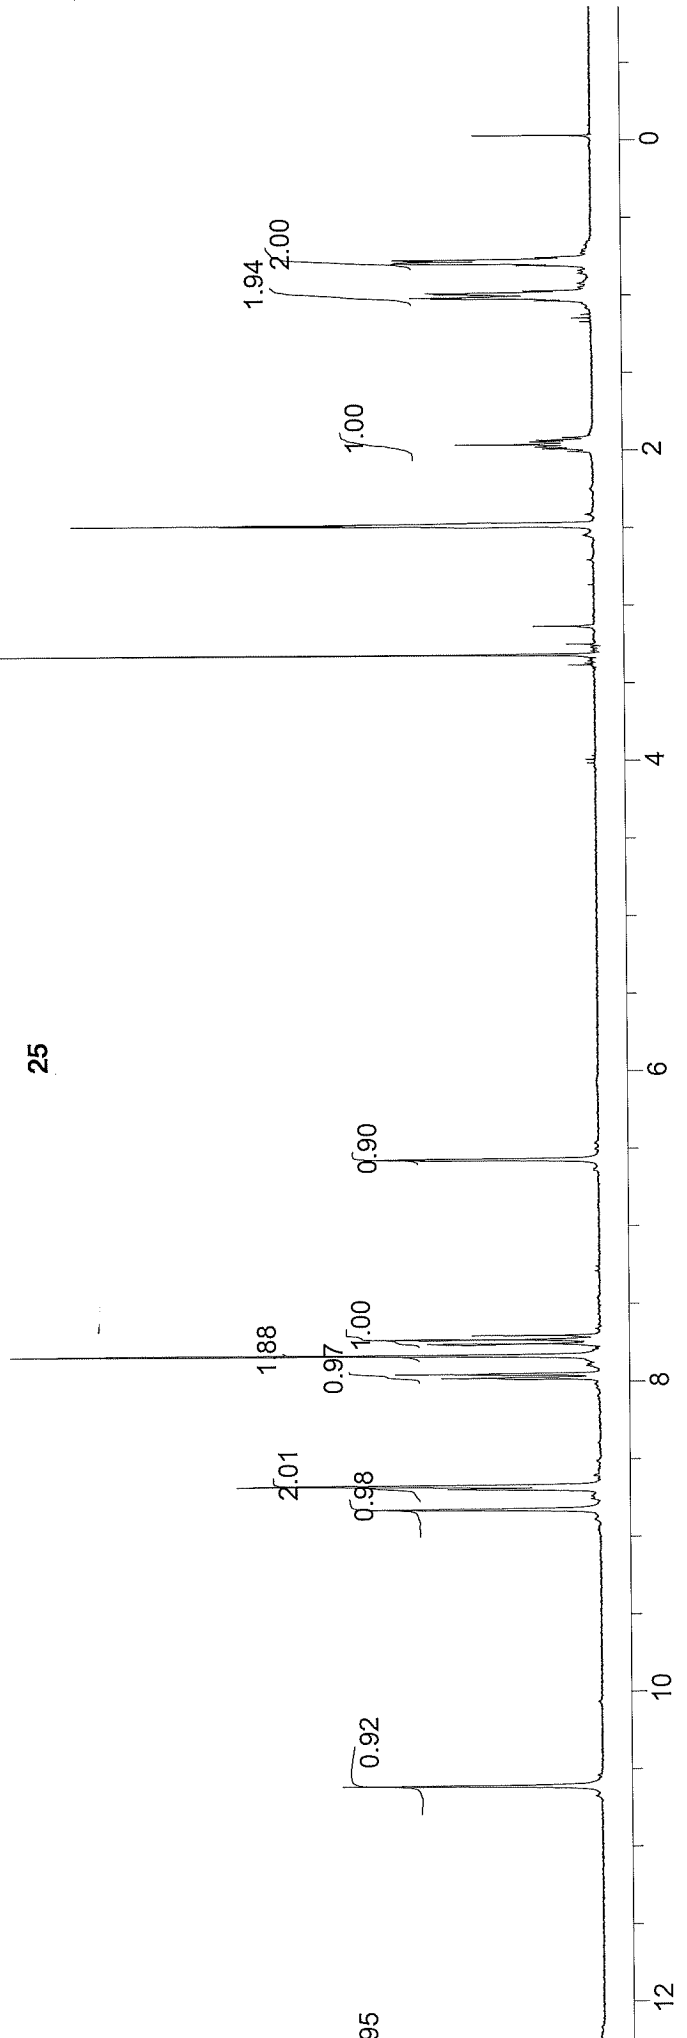

WARD 1H OBSERVE; blank line  
 .918 F2: 75.421  
 SW1: 7987  
 PW: 6.2 usec  
 PD: 1.0 sec  
 OF1: 1799.5  
 NA: 8  
 LB: 0.0  
 PTS1d: 16384  
 Nuts - \$CP-LXL-735-90-H1-DMSO-070t  
 USER: -- DATE: Jun 21

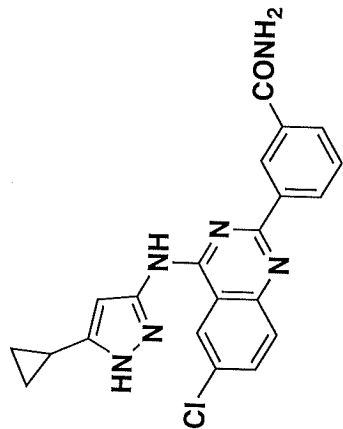

26

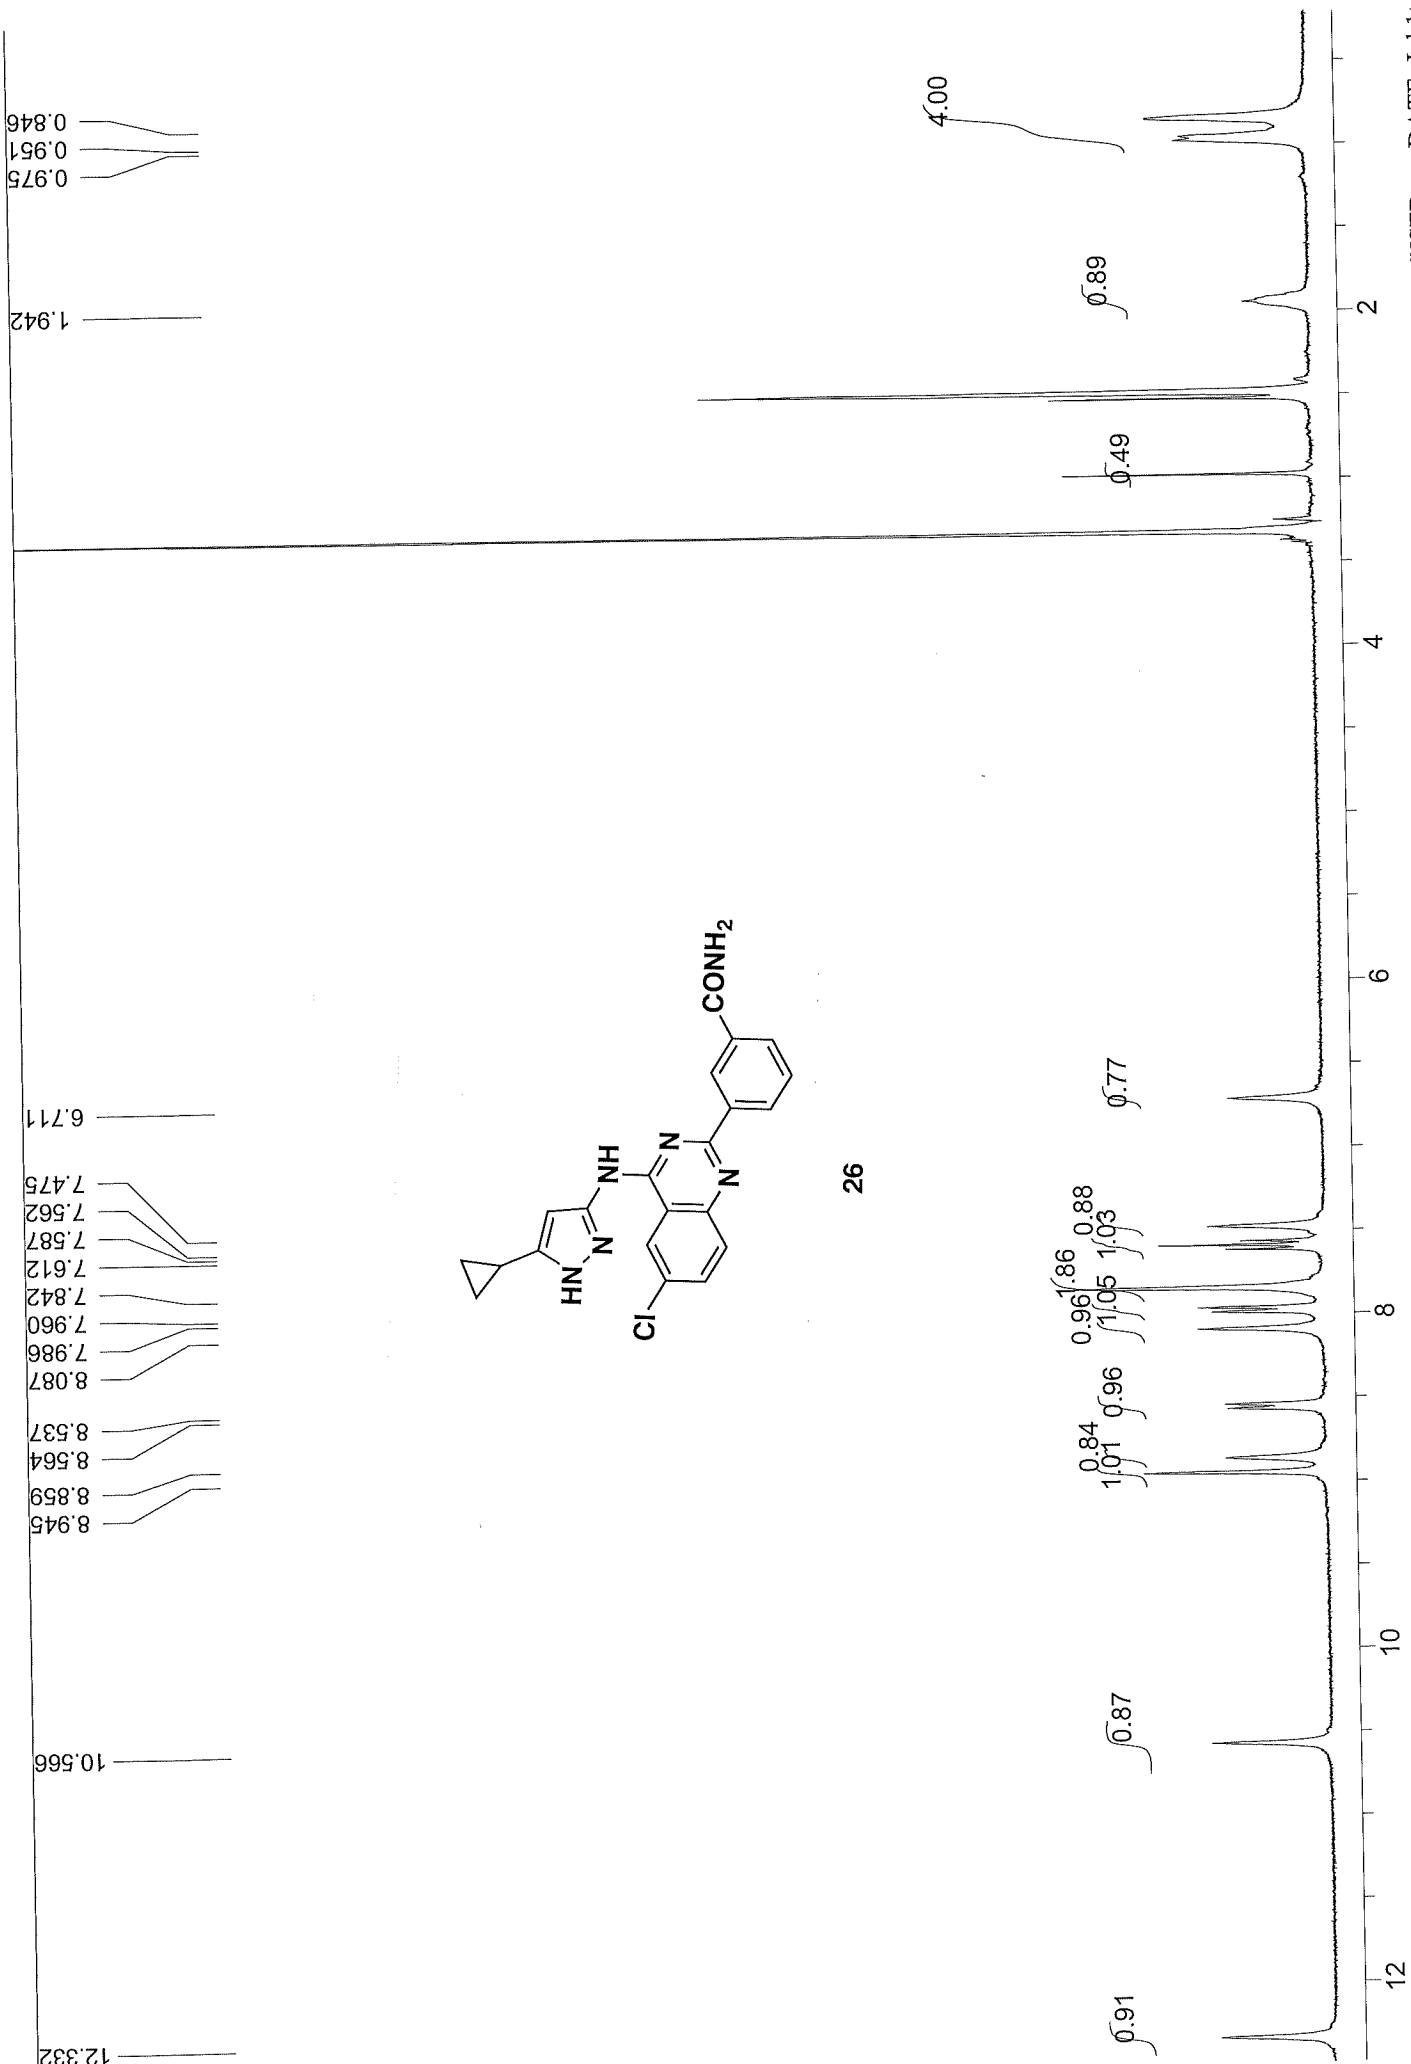

USER: -- DATE: Jul 11

|                     |               |             |              |
|---------------------|---------------|-------------|--------------|
| 4-5-H1-CDC13-070711 | PTSIId: 16384 | OF1: 1799.5 | PD: 1.0 sec  |
| 0.918               | F2: 75.421    | NA: 8       | PW: 6.2 usec |
|                     |               | LB: 0.0     |              |

pu1

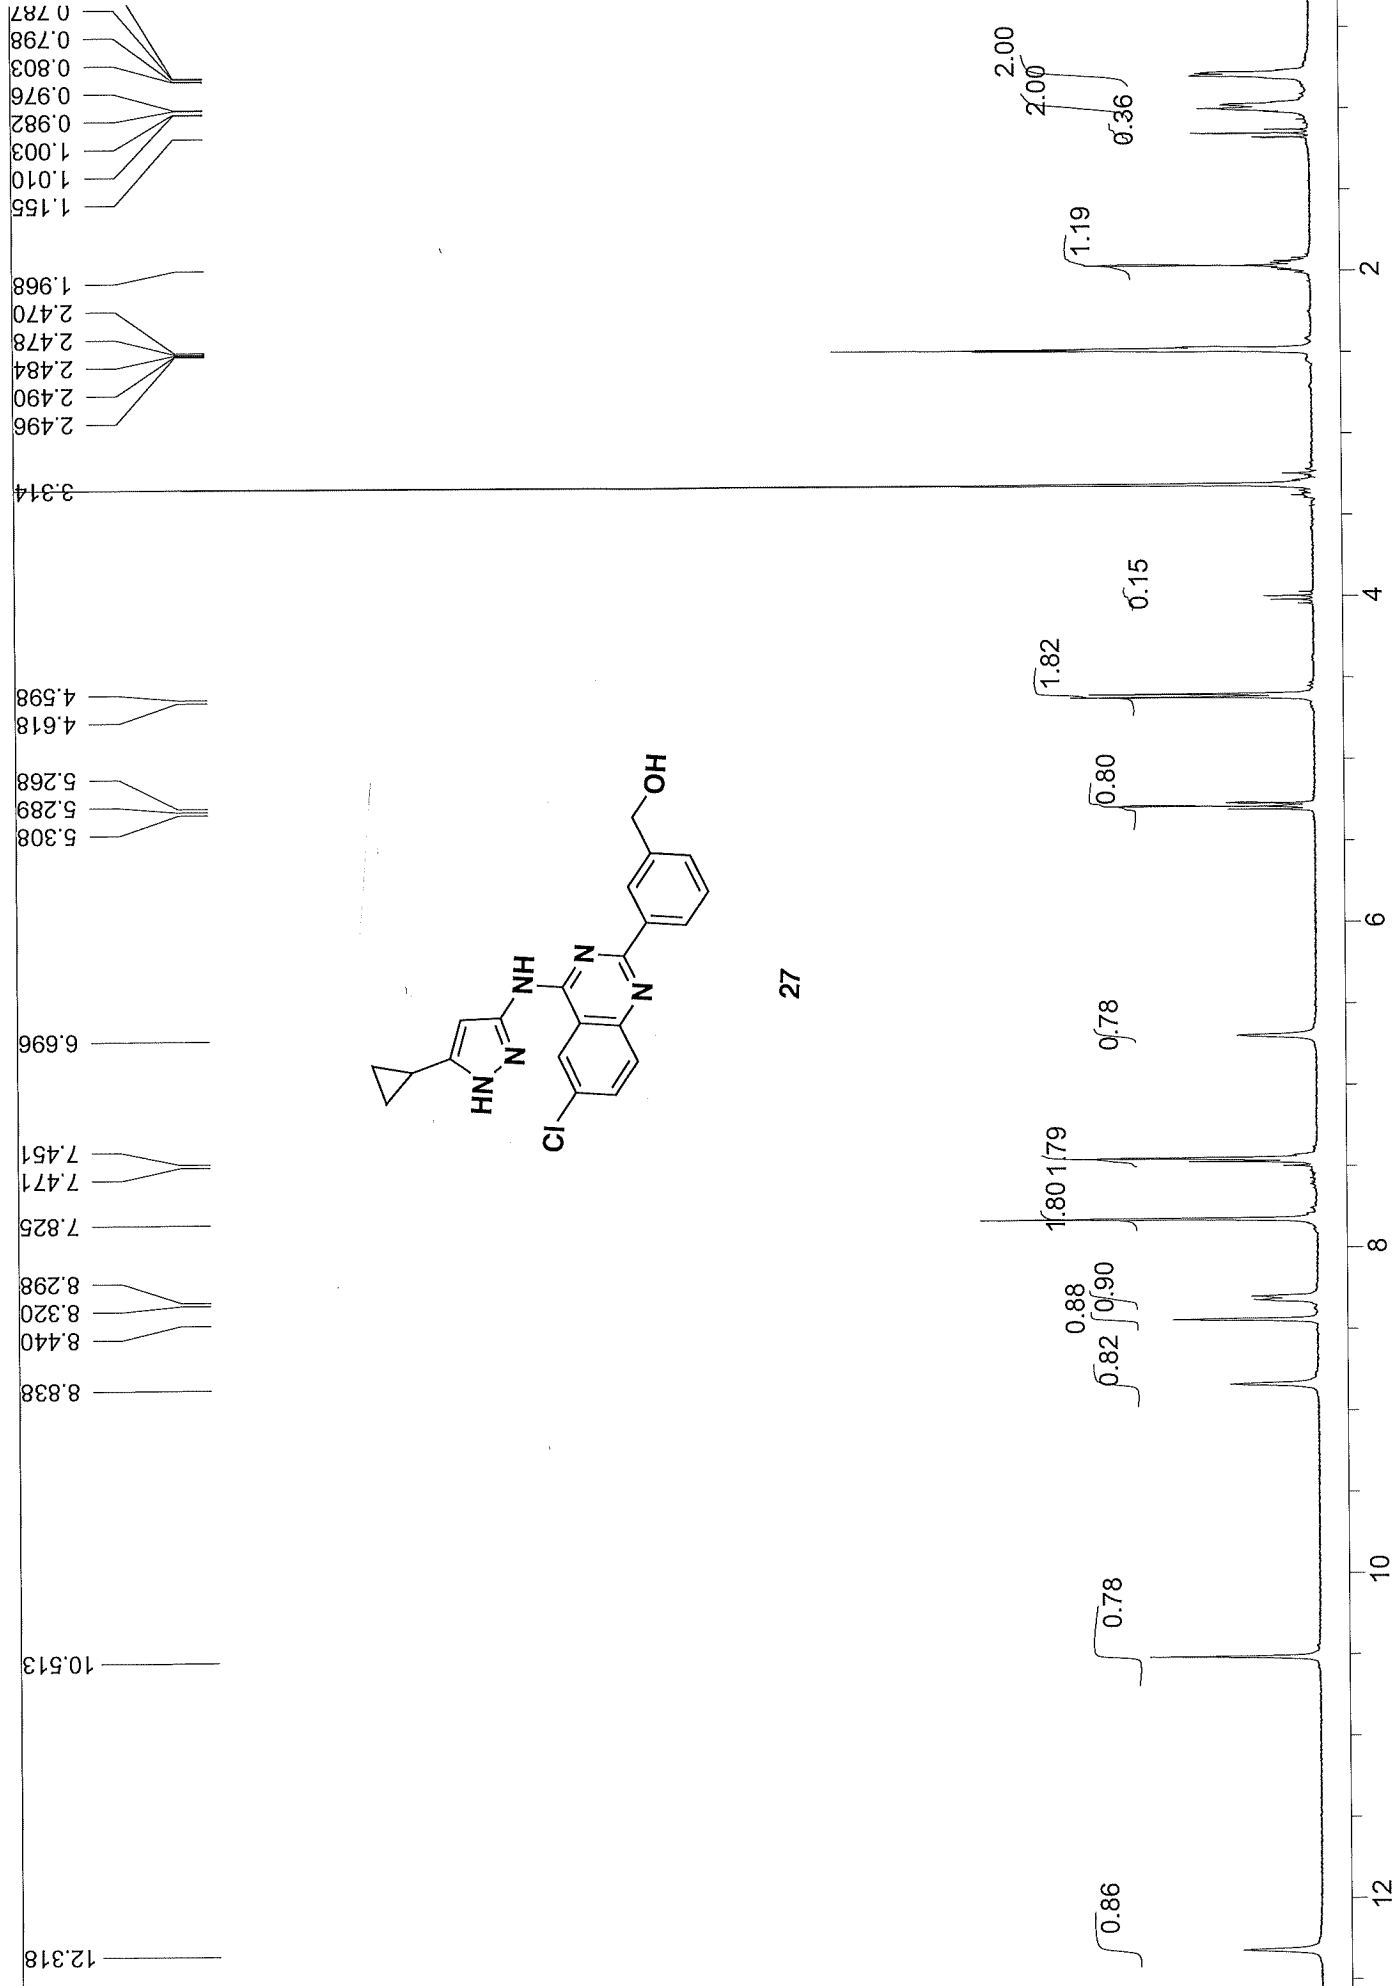

27

|                             |              |                     |                                    |
|-----------------------------|--------------|---------------------|------------------------------------|
| WARD 1H OBSERVE; blank line |              | USER: -- DATE: Jul. |                                    |
| 918                         | F2: 75.421   | PTSId: 16384        | Nuts - \$CP-LXL-735-92-H1-DMSO-070 |
|                             | PW: 6.2 usec | LB: 0.0             |                                    |
|                             | PD: 1.0 sec  | NA: 8               |                                    |
|                             | SW1: 7987    | OF1: 1799.5         |                                    |

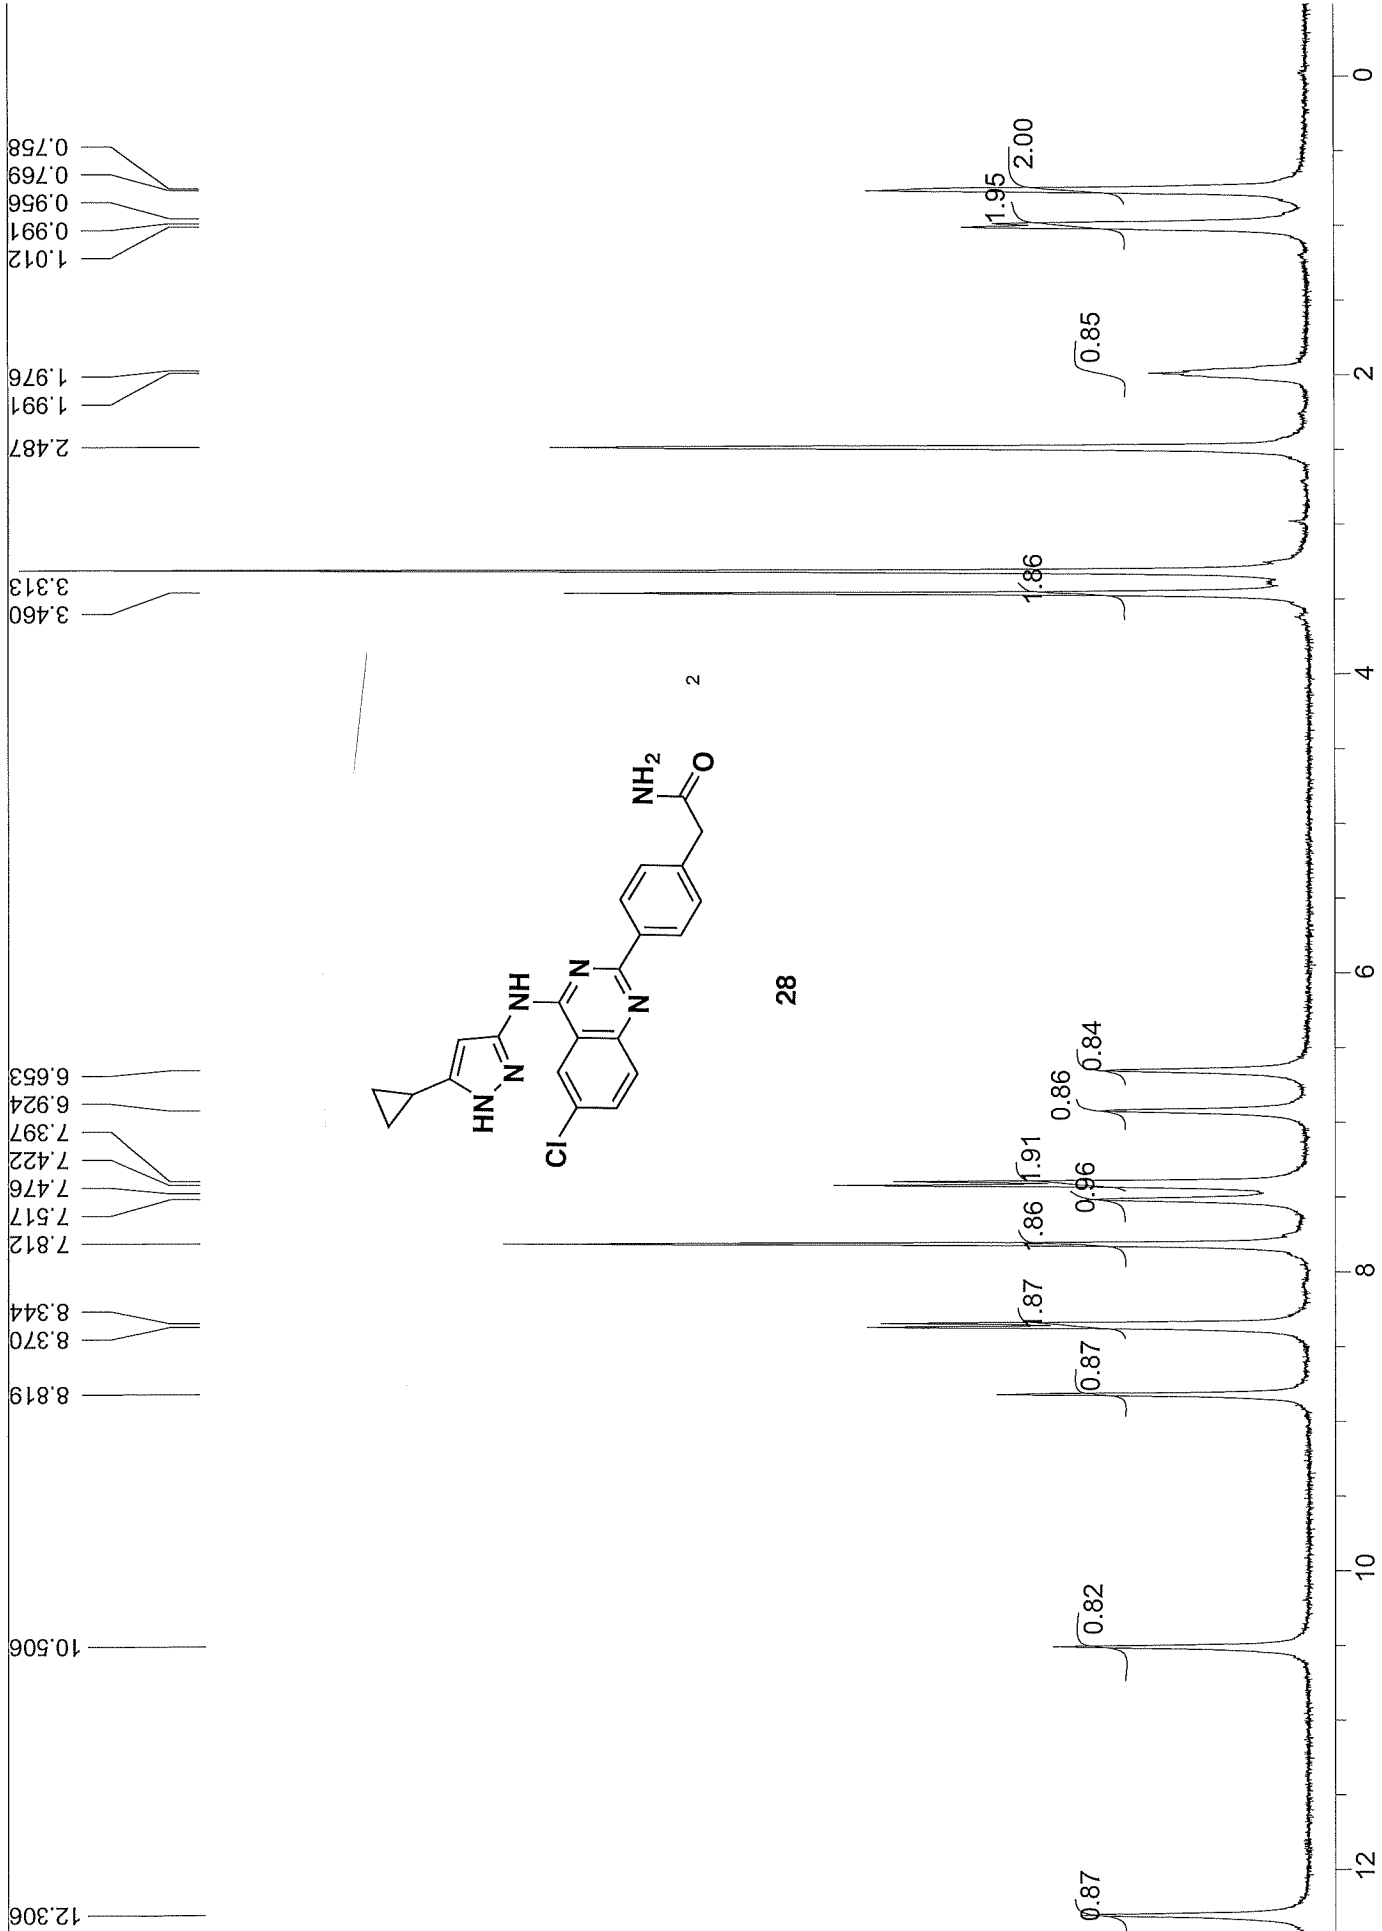

ARD 1H OBSERVE:blank line  
 918 F2: 75.421  
 ul  
 USER: -- DATE: Jul  
 PTSId: 16384  
 Nuts - SCP-LXL-735-88-H1-DMSO-070  
 LB: 0.0  
 OF1: 1799.5  
 NA: 8  
 PD: 1.0 sec  
 PW: 6.2 usec  
 SW1: 7987

12.315  
10.555  
8.835  
8.481  
8.453  
8.082  
8.025  
7.997  
7.839  
7.446  
6.643  
3.309  
2.519  
2.480  
1.999  
1.984  
1.968  
1.012  
0.991  
0.772  
0.760

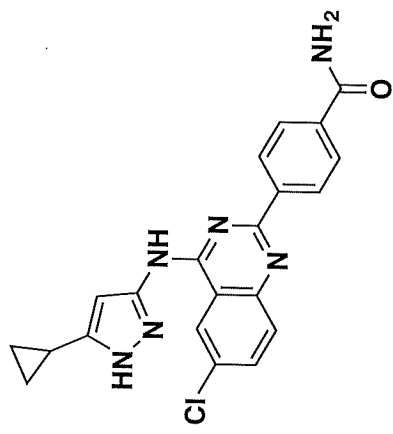

29

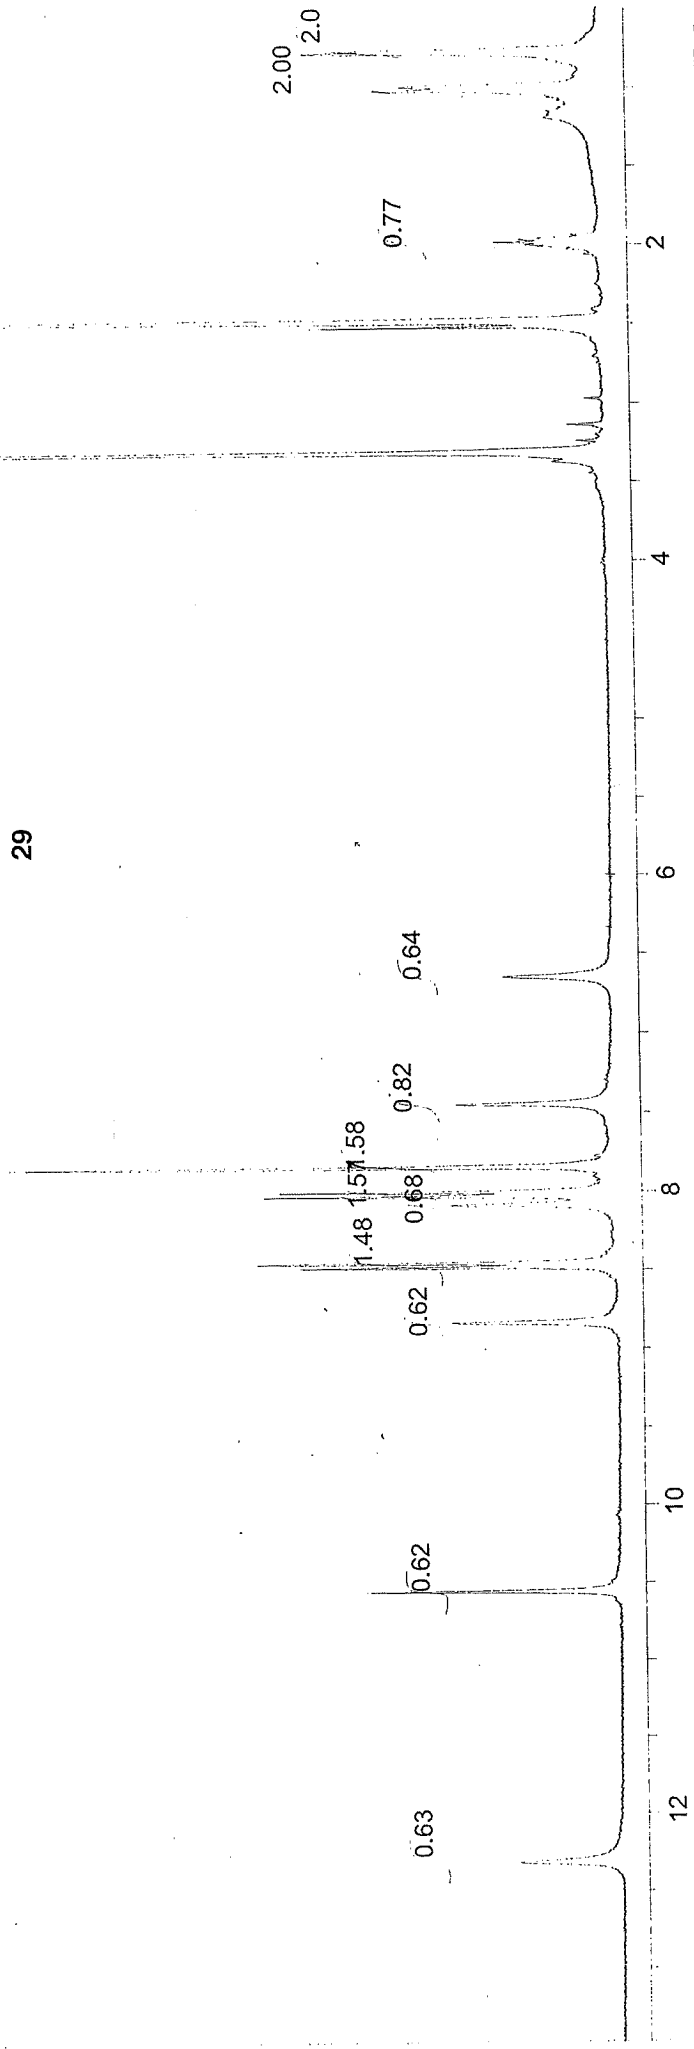

STANDARD IH.OBSERVE:blank line  
 F1: 299.918 F2: 75.421  
 SW1: 7987 PD: 1.0 sec  
 PW: 6.2 usec  
 NA: 16  
 OF1: 1799.5  
 LB: 0.0  
 PTS1d: 16384  
 Nuts - \$CP-LXL735-85-HJ-DMSO-0  
 USER: -- DATE: Jun

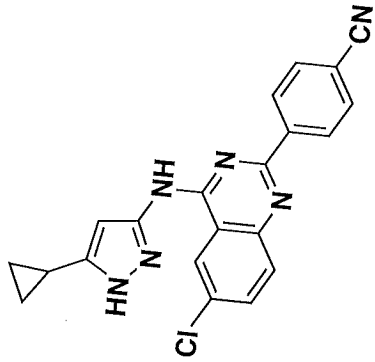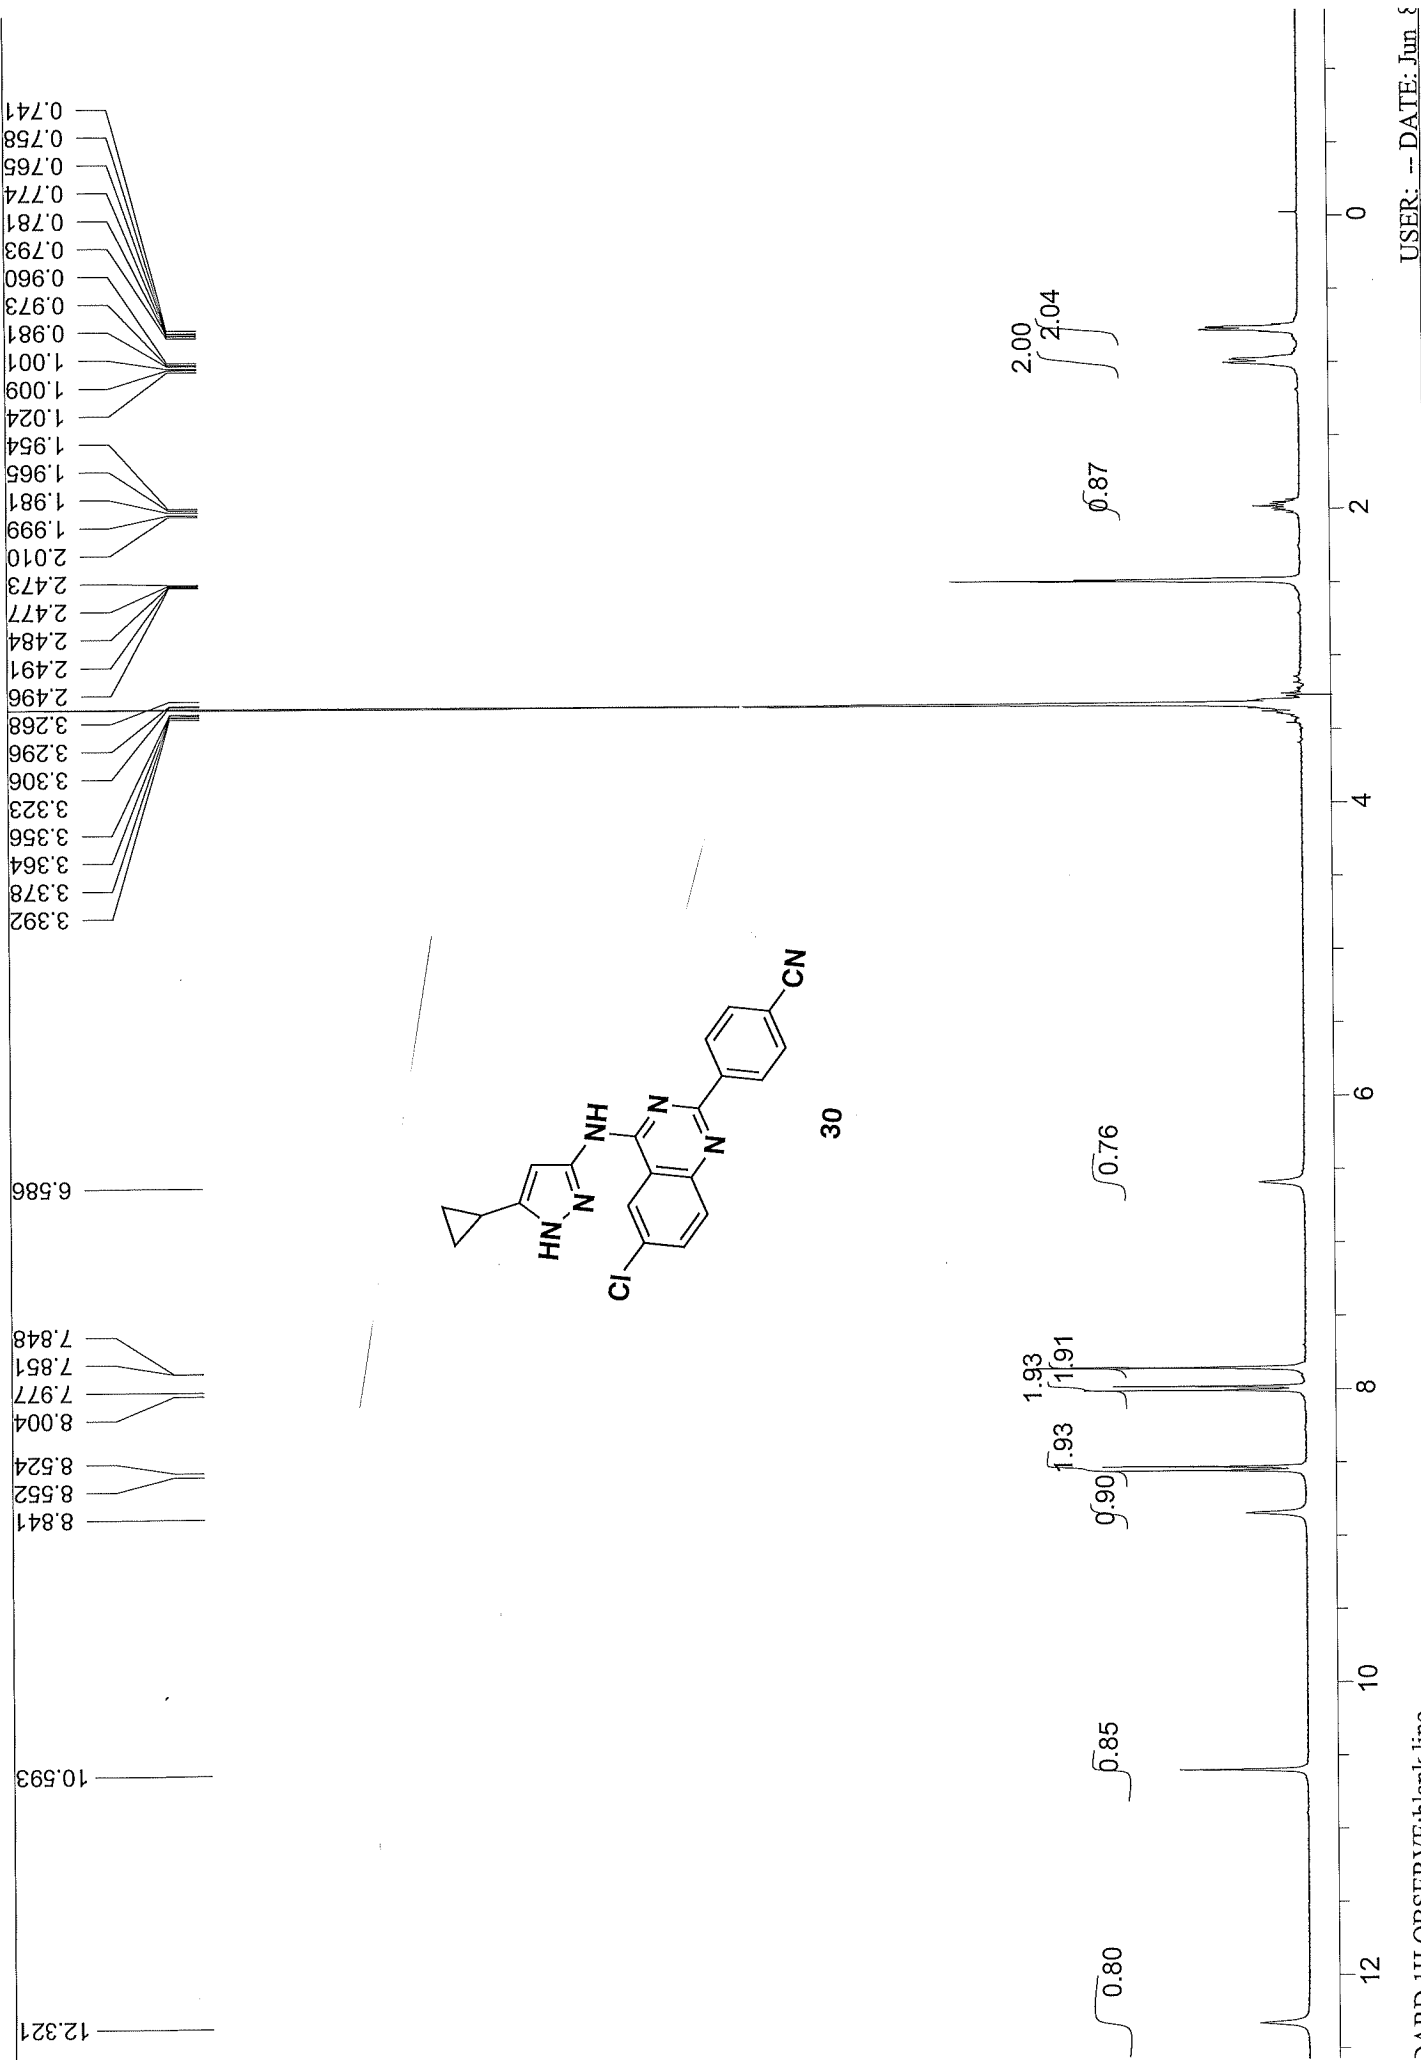

DARD 1H OBSERVE: blank line  
 USER: -- DATE: Jun 8  
 SW1: 7987  
 PTS1d: 16384  
 F2: 75.421  
 Nuts - \$CP-LXL-735-80-HI-DMSO-0706  
 PD: 1.0 sec  
 LB: 0.0  
 OF1: 1799.5  
 NA: 16

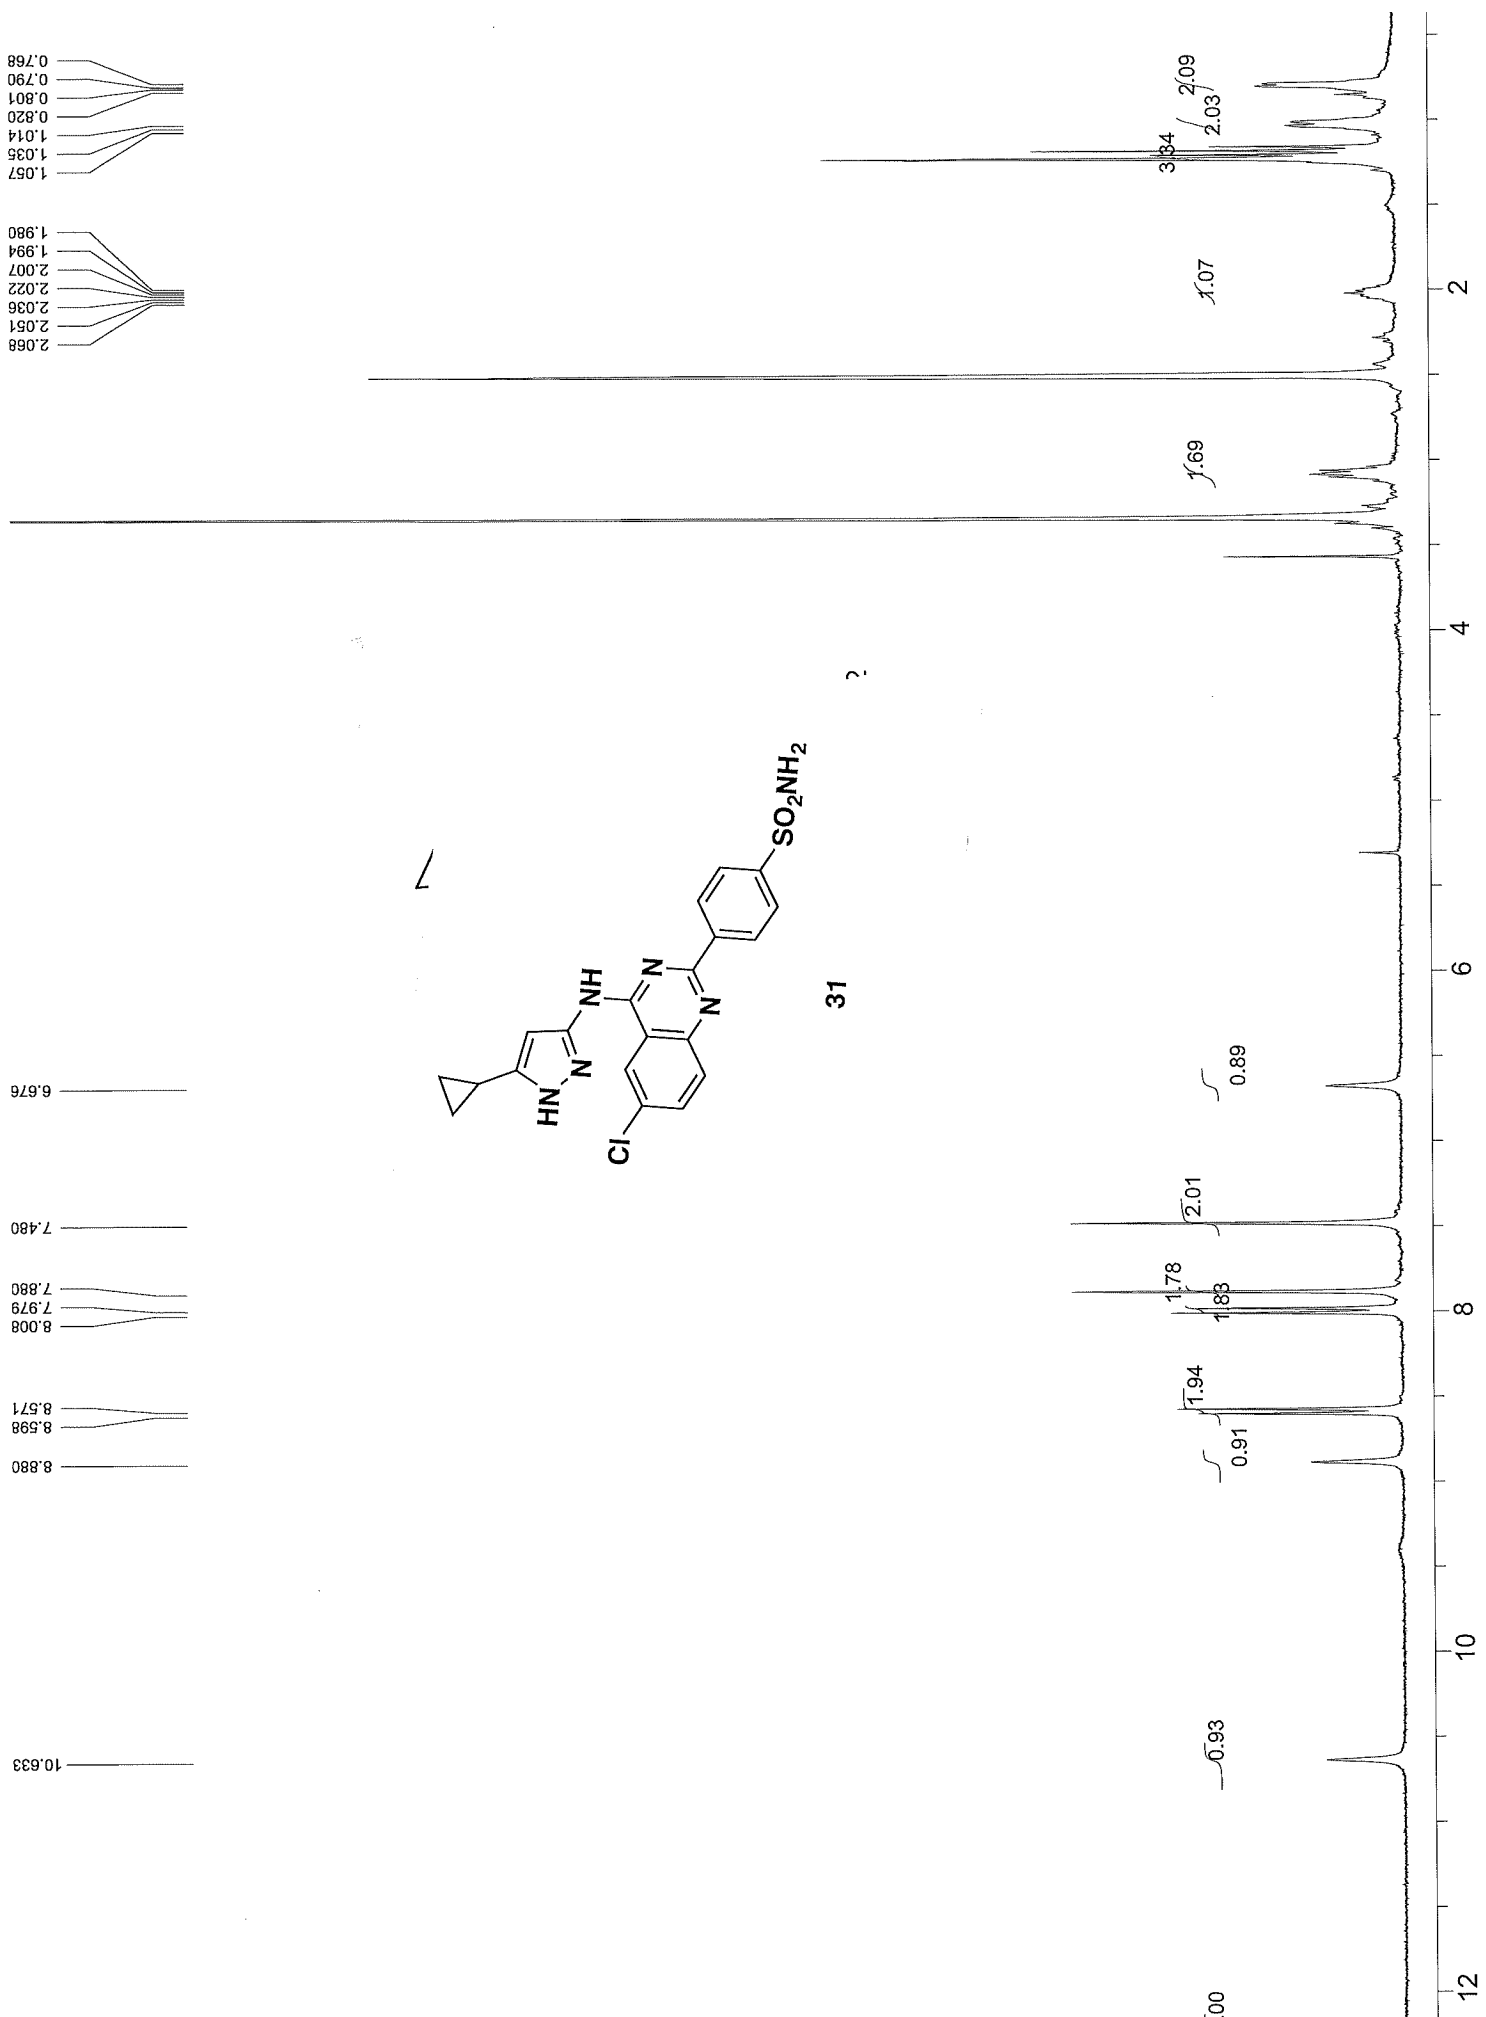

RD\_1H OBSERVE

8 F2: 75.421

SW1: 7987

PW: 6.2 usec

OFI: 1806.8

NA: 16

PD: 1.0 sec

PTS1d: 16384

LB: 0.0

WimNuts - \$CP-fxl-740-151-B-H1-DMSO-070929T

USER: -- DATE: Sep 21

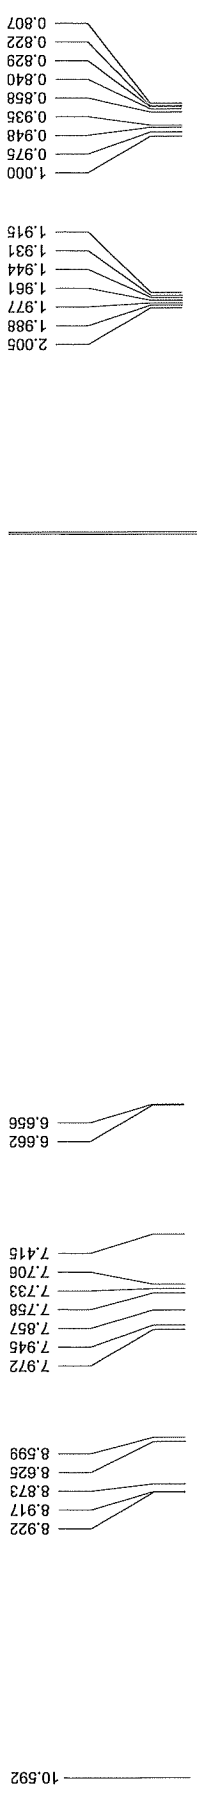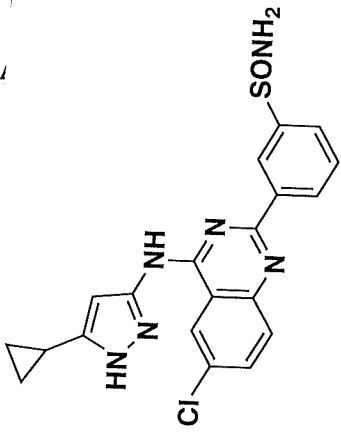

32

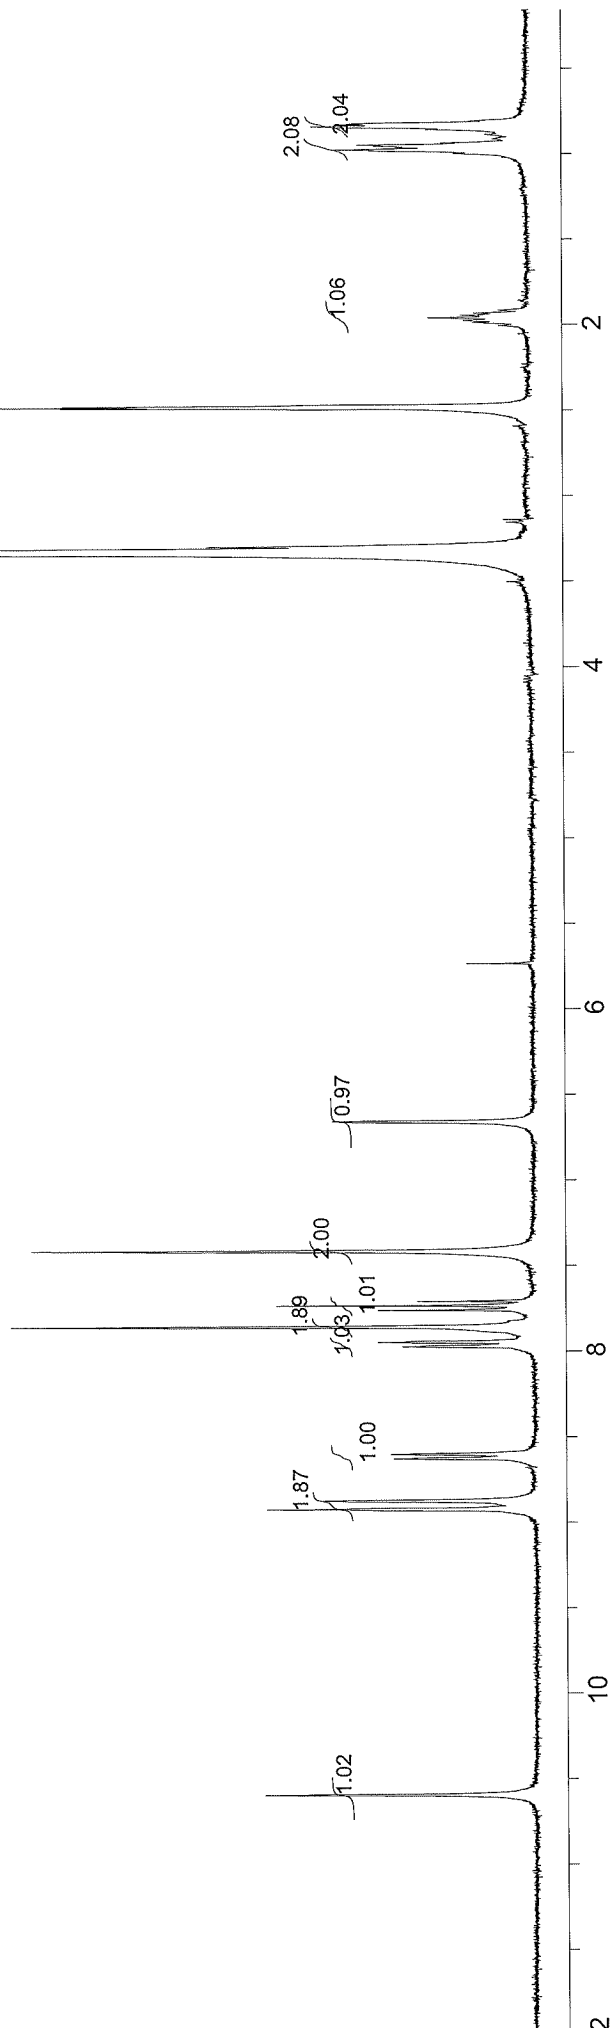



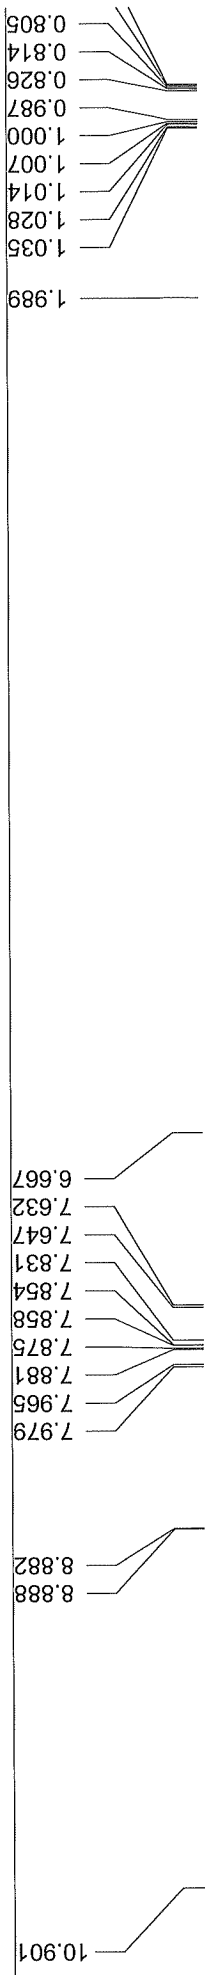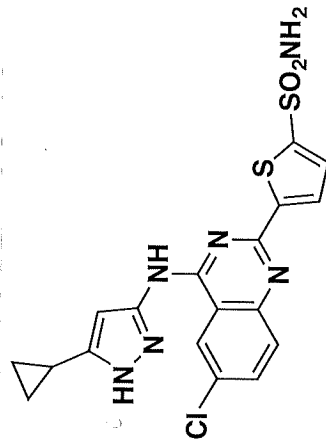

33

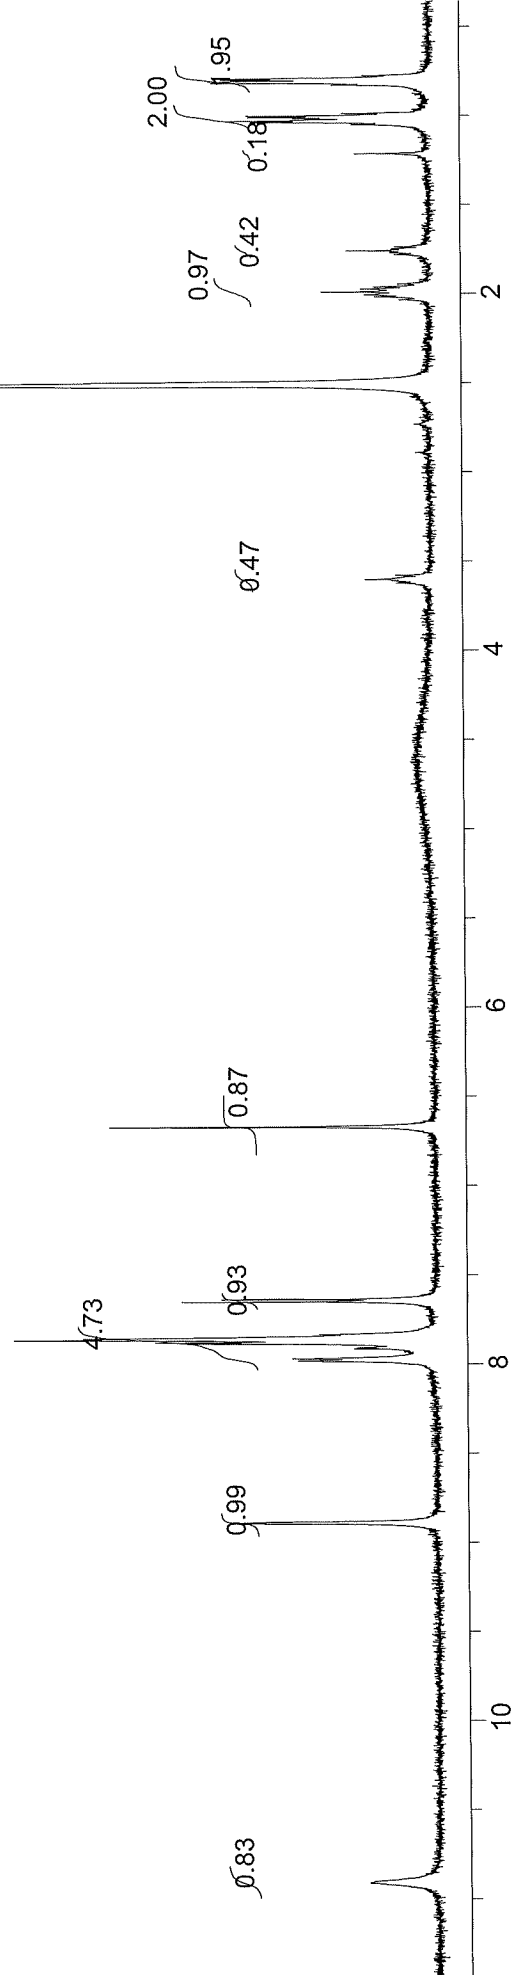

|                           |              |                       |                                               |
|---------------------------|--------------|-----------------------|-----------------------------------------------|
| RD 1H OBSERVE: blank line |              | USER: -- DATE: Dec. 1 |                                               |
| 18                        | F2: 75.421   | PTSId: 16384          | Nuts - \$CP-CJG-0001588-026-A-h1-DMSO-071208] |
|                           | SW1: 5602    | LB: 0.0               |                                               |
|                           | PW: 4.3 usec | OF1: 1806.8           |                                               |
|                           | PD: 1.0 sec  | NA: 8                 |                                               |

2.009  
1.989  
1.979  
1.963  
1.946  
1.934  
1.917  
1.632  
1.557  
1.483  
1.085  
1.079  
1.072  
1.057  
0.905  
0.892  
0.874  
0.868  
0.852

8.849  
8.786  
8.759  
8.632  
8.609  
8.162  
7.999  
7.973  
7.919  
7.893  
7.877  
7.854  
7.828  
7.802  
7.777  
7.755  
7.751  
7.653  
7.627  
7.613  
7.602  
7.584  
7.557  
7.529  
7.259  
6.777  
6.739

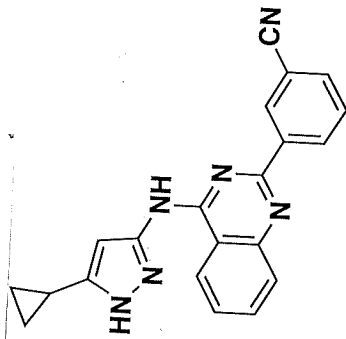

34

0.95 0.76 1.05 181.16  
0.83 0.23 0.90 1.19

0.64

1.26 0.00  
0.68

0.93

PPM

|                        |             |                                           |
|------------------------|-------------|-------------------------------------------|
| 1H OBSERVE: blank line |             | USER: -- DATE: Jul 13 2007                |
| F2: 75.421             | SW1: 7987   | PTSID: 16384                              |
| PW: 6.2 usec           | OF1: 1799.5 | LB: 0.0                                   |
|                        | NA: 32      | File: \$CP-LXL-735-96-H1-CDCL3-070713.fid |

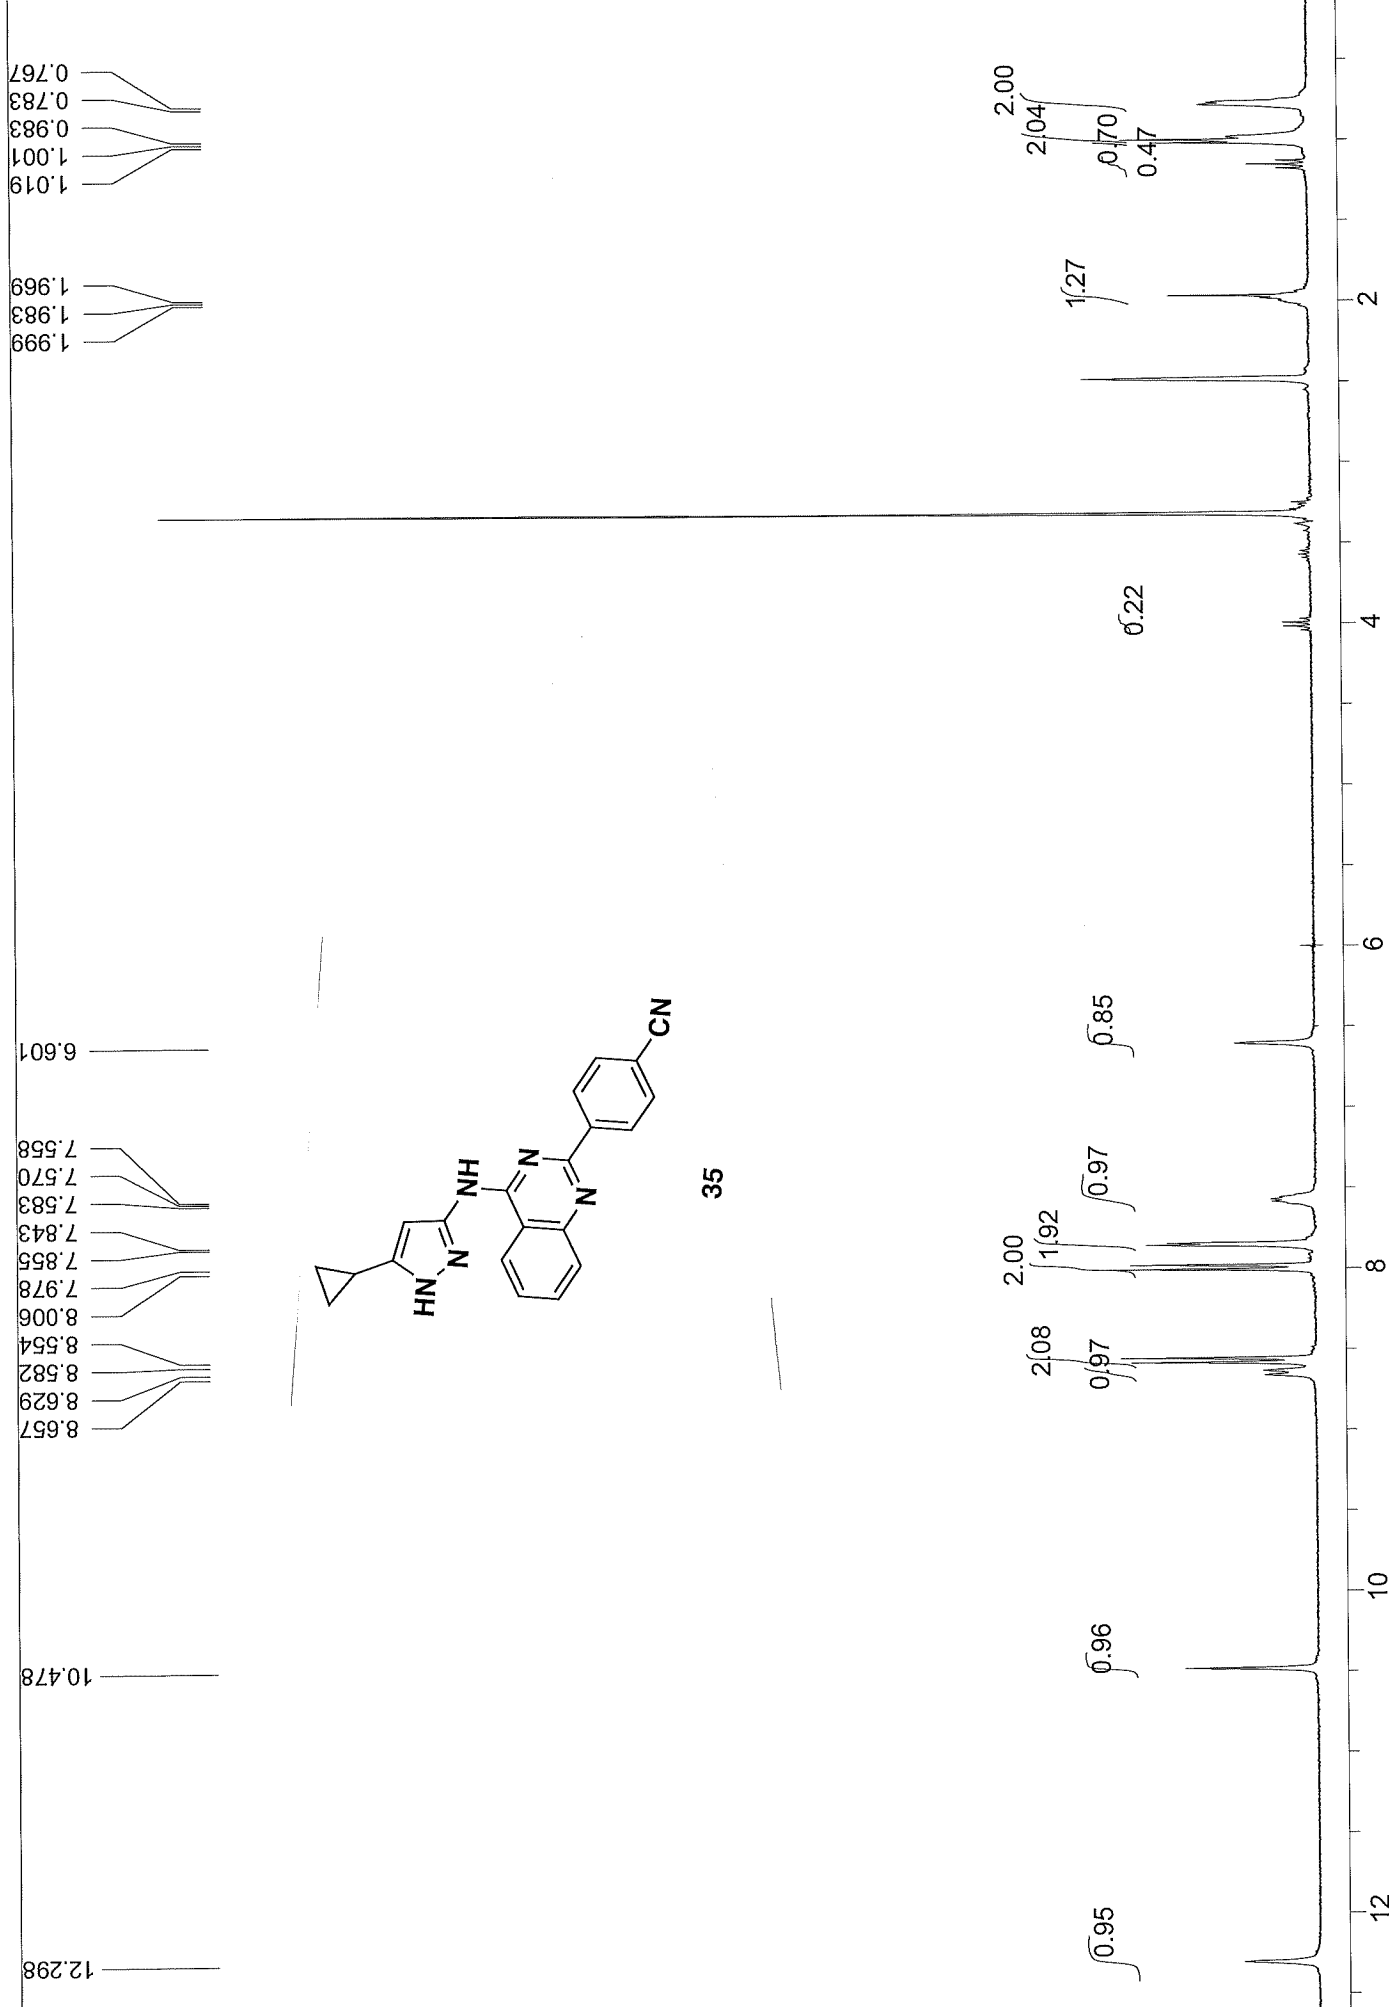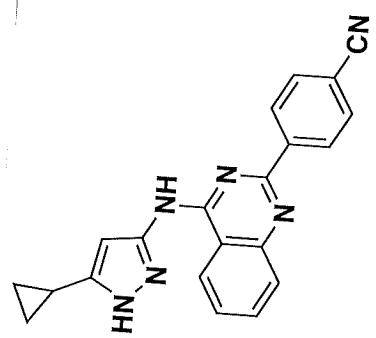

35

|                     |              |             |                                      |                       |
|---------------------|--------------|-------------|--------------------------------------|-----------------------|
| 4-5-H1-CDCl3-070711 | SW1: 7987    | OF1: 1799.5 | PTS1d: 16384                         | USER: -- DATE: Jul 11 |
| 9.918               | F2: 75.421   | NA: 8       | Nuts - \$CP-LXL-735-108-H1-DMISO-070 |                       |
| 0.1                 | PW: 6.2 usec | PD: 1.0 sec | LB: 0.0                              |                       |

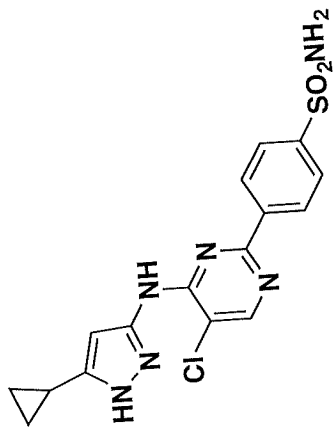

36

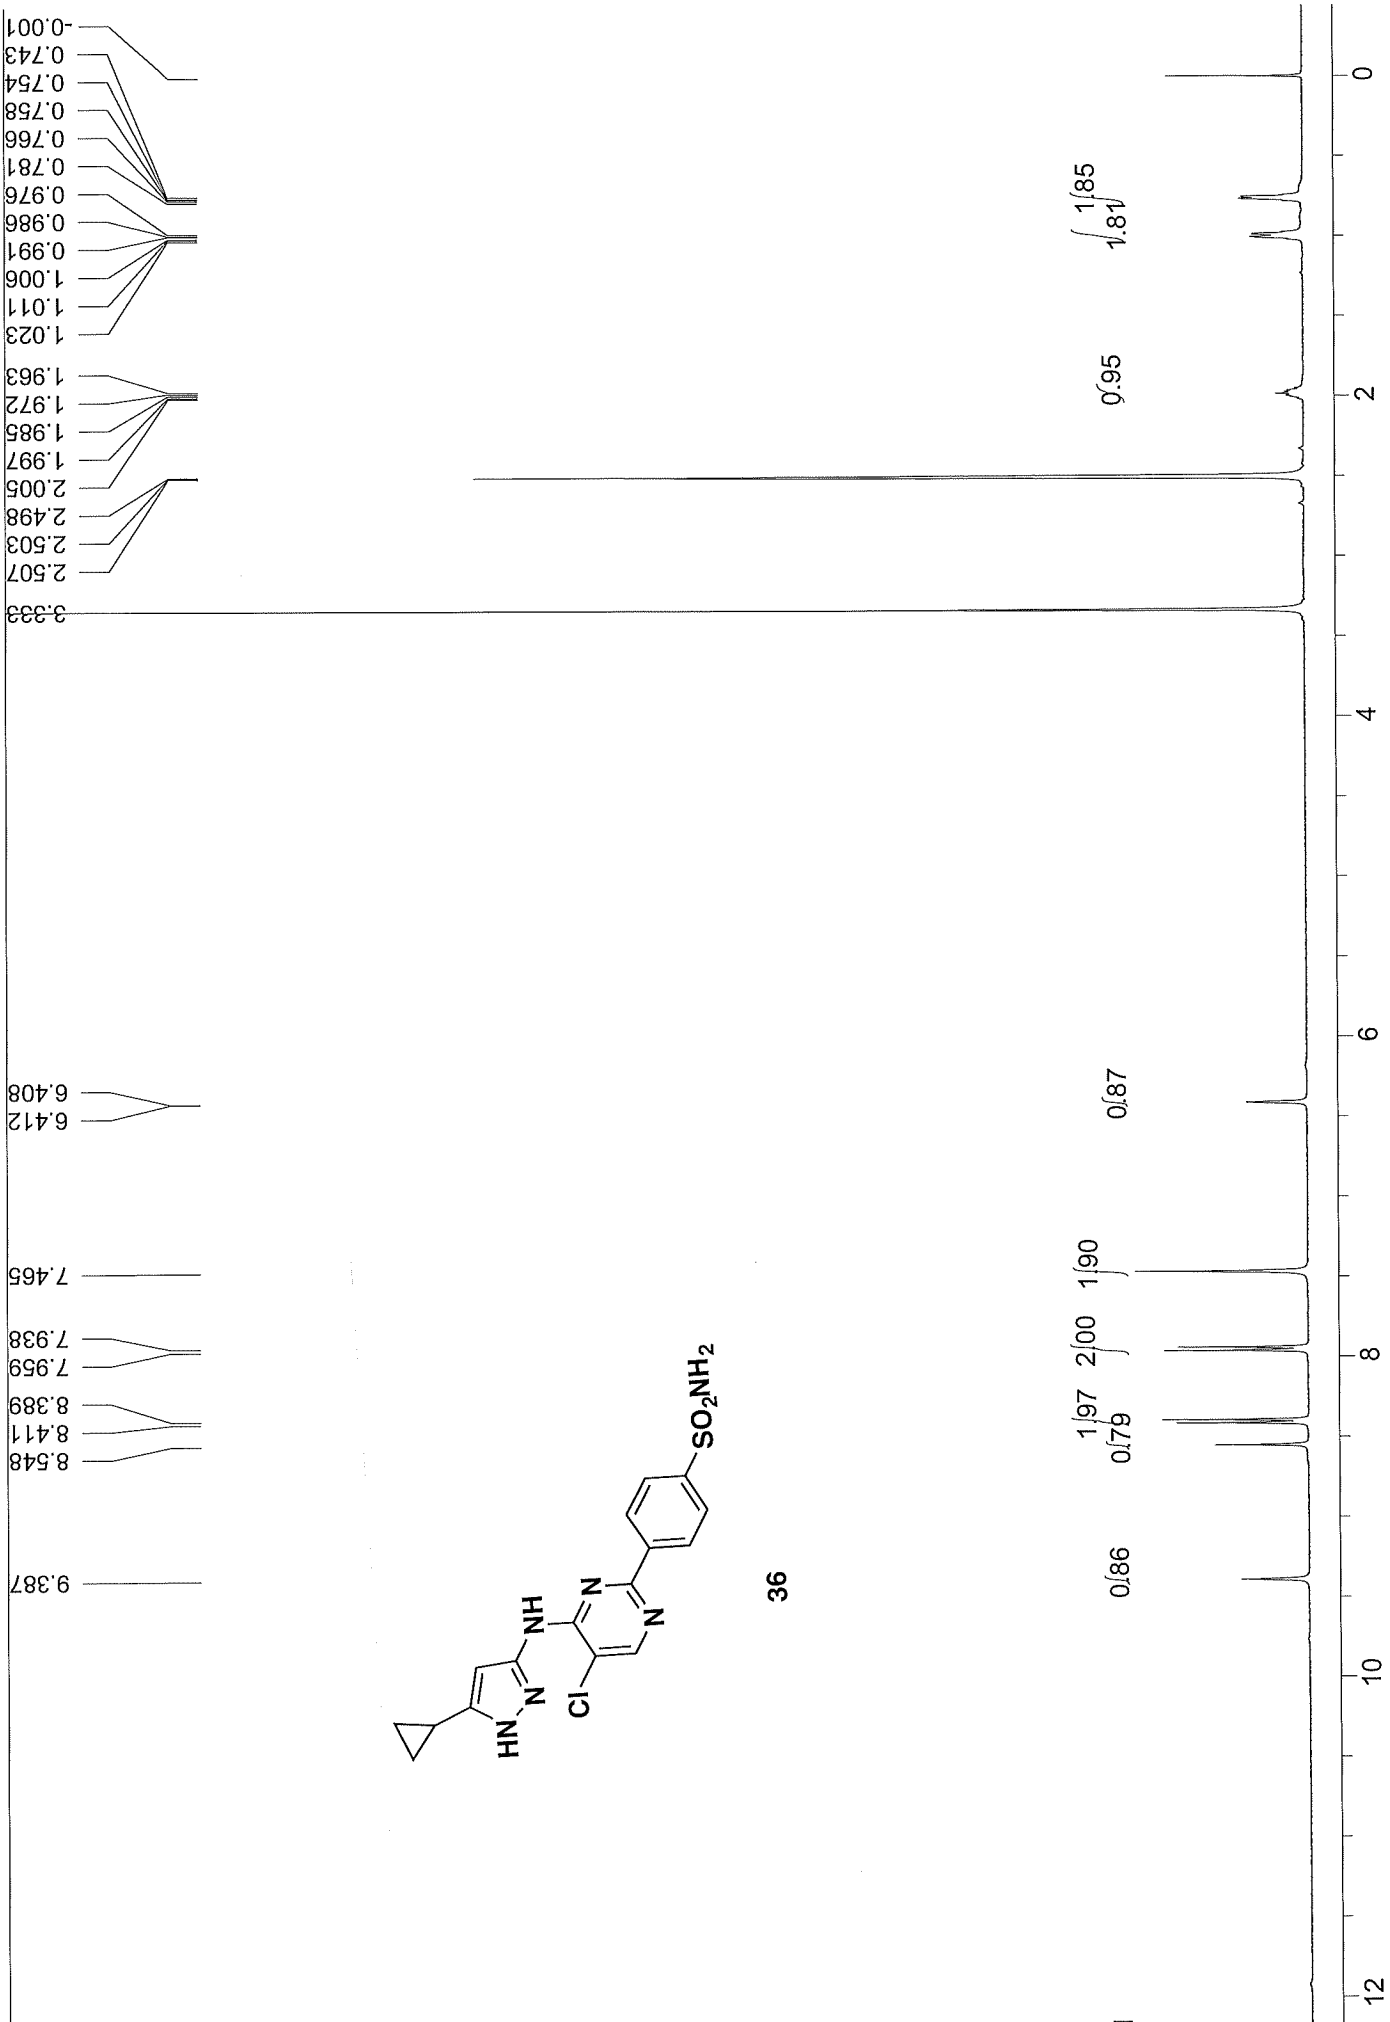

SO,  
2  
F2: 1.000  
SW1: 8224  
PW: 13.8 usec  
PD: 1.0 sec  
OF1: 2474.8  
NA: 8  
LB: 0.0  
PTS1d: 32768  
Nuts -

USER: nmr -- DATE: Wed Apr 23 12:37:51

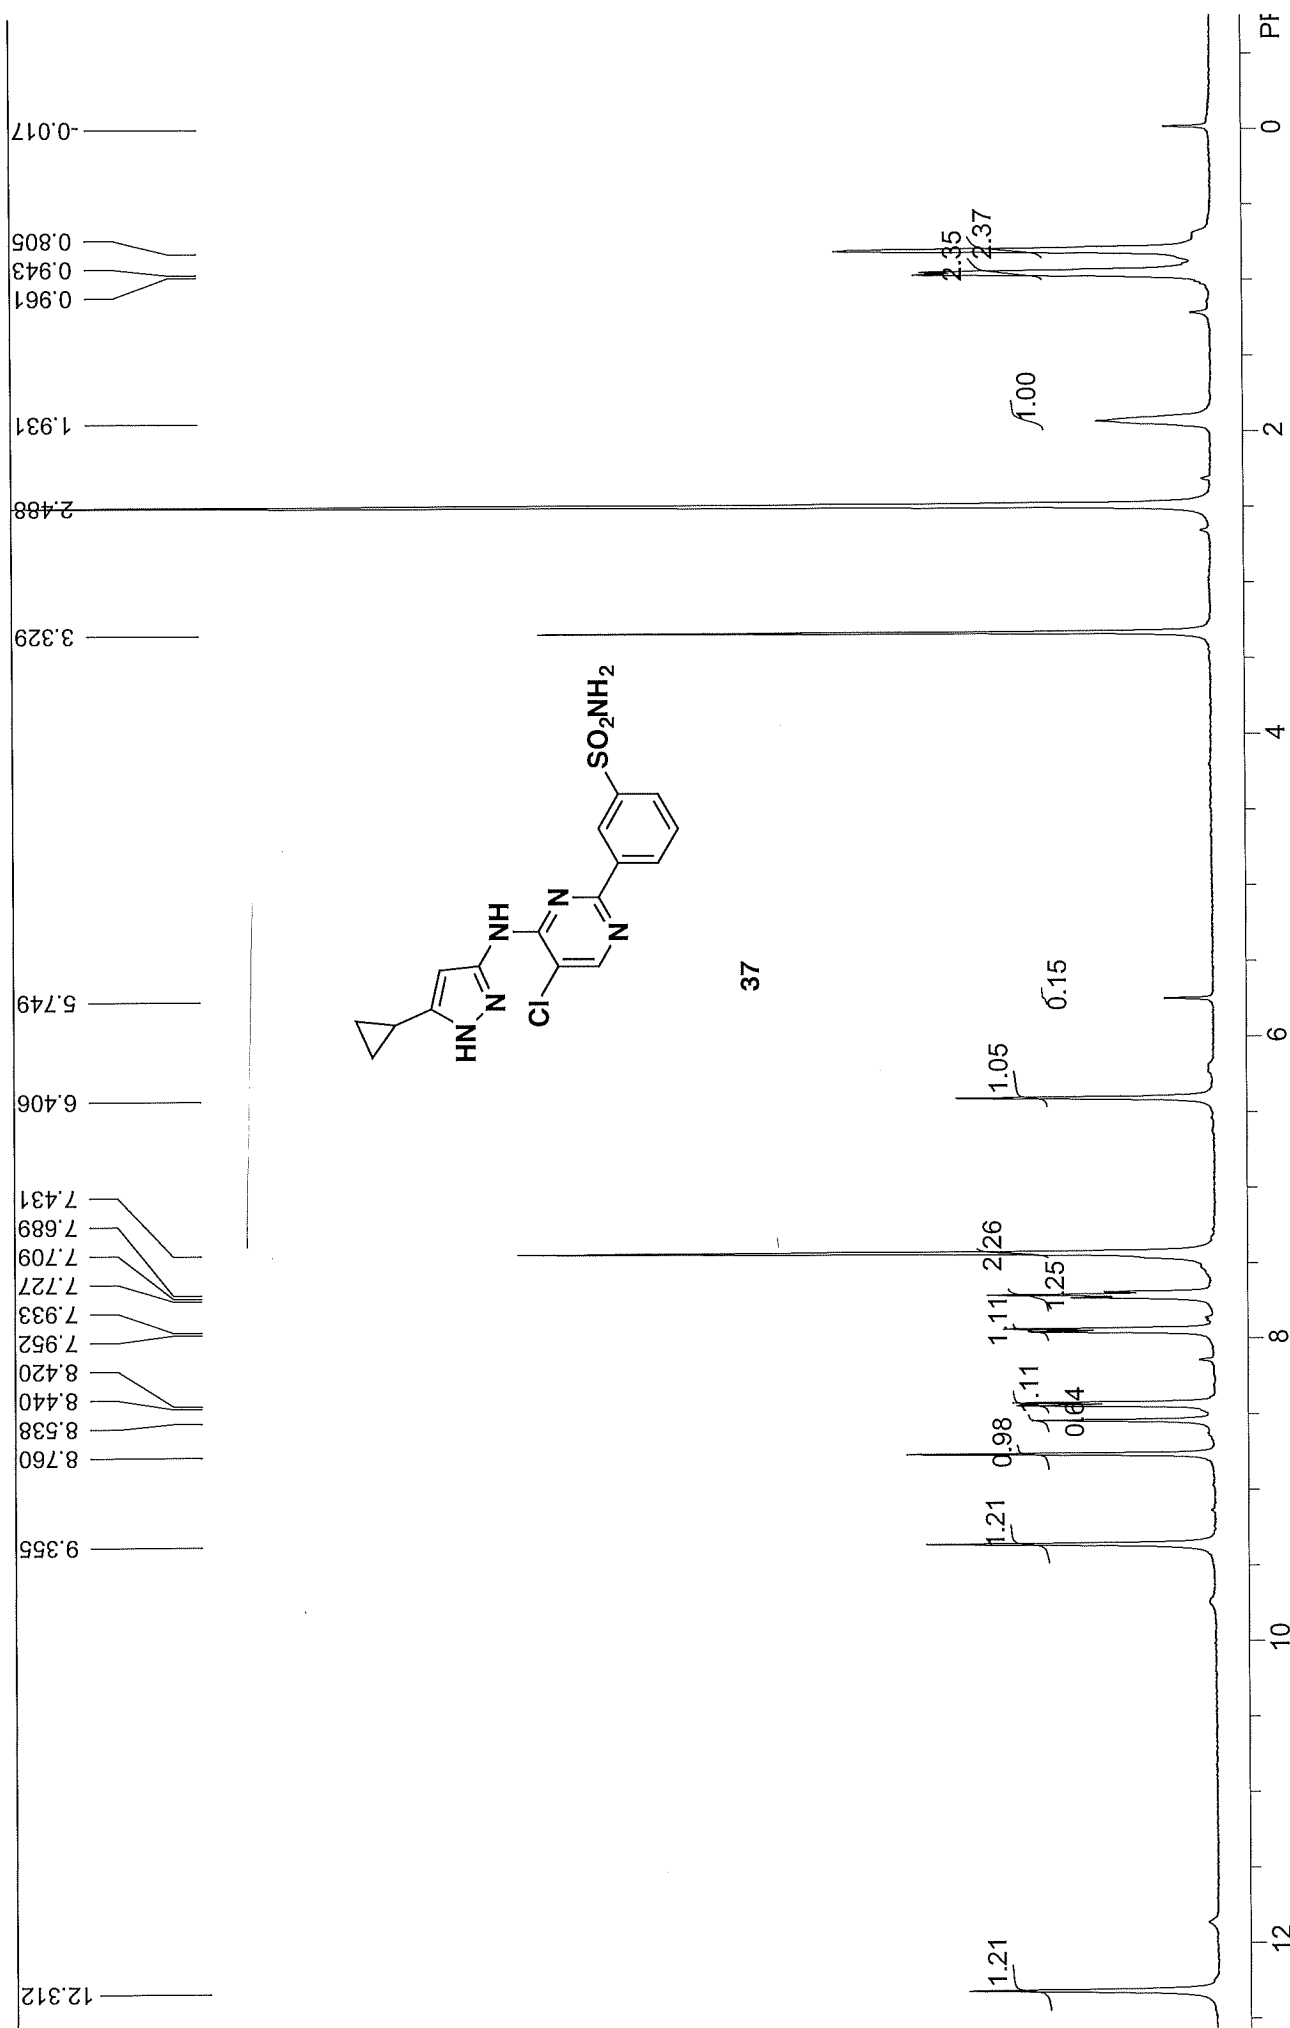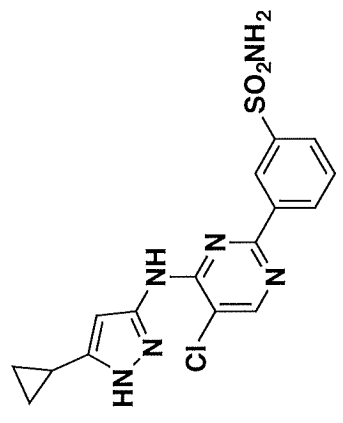

ct. DMSO.  
 400.133 F2: 1.000  
 : : zg

USER: nmr -- DATE: Mon Jan 28 13:47:07 200  
 PTS1d: 16384  
 OF1: 2600.9  
 LB: 0.0  
 NA: 8  
 PD: 1.0 sec  
 Nuts - \$pda

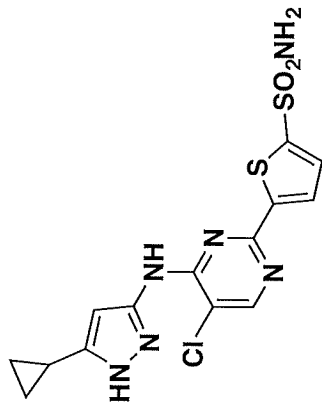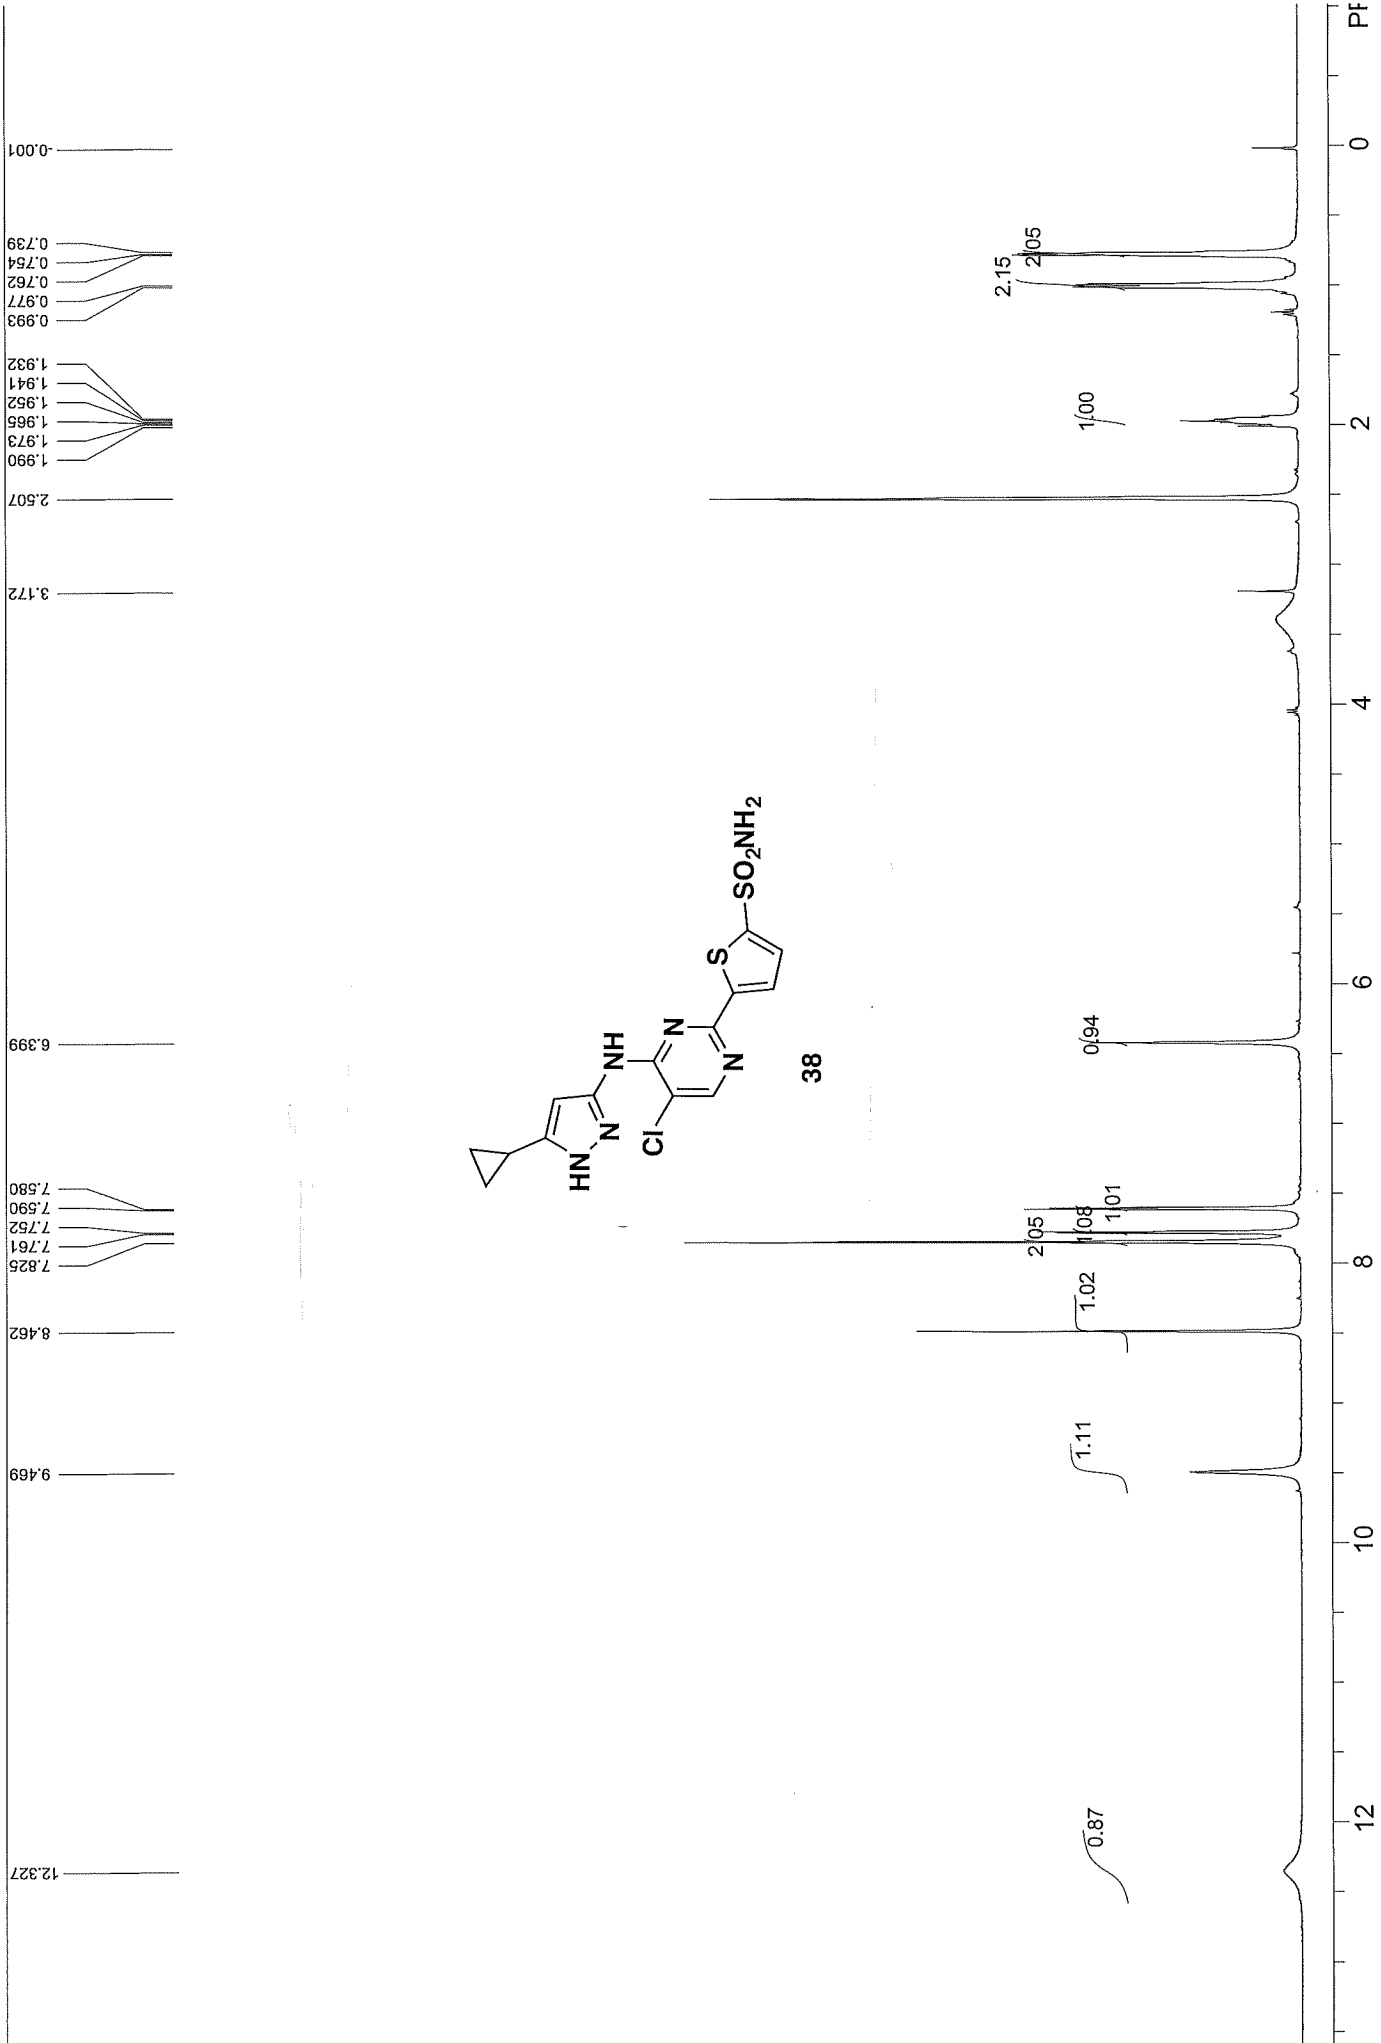

USER: nmr -- DATE: Mon Jul 07 07:54:29 2007  
 PTSId: 32768  
 OF1: 2483.9  
 NA: 8  
 LB: 0.0  
 PD: 1.0 sec  
 SW1: 8224  
 PW: 13.8 usec  
 WinNuts - \$pda

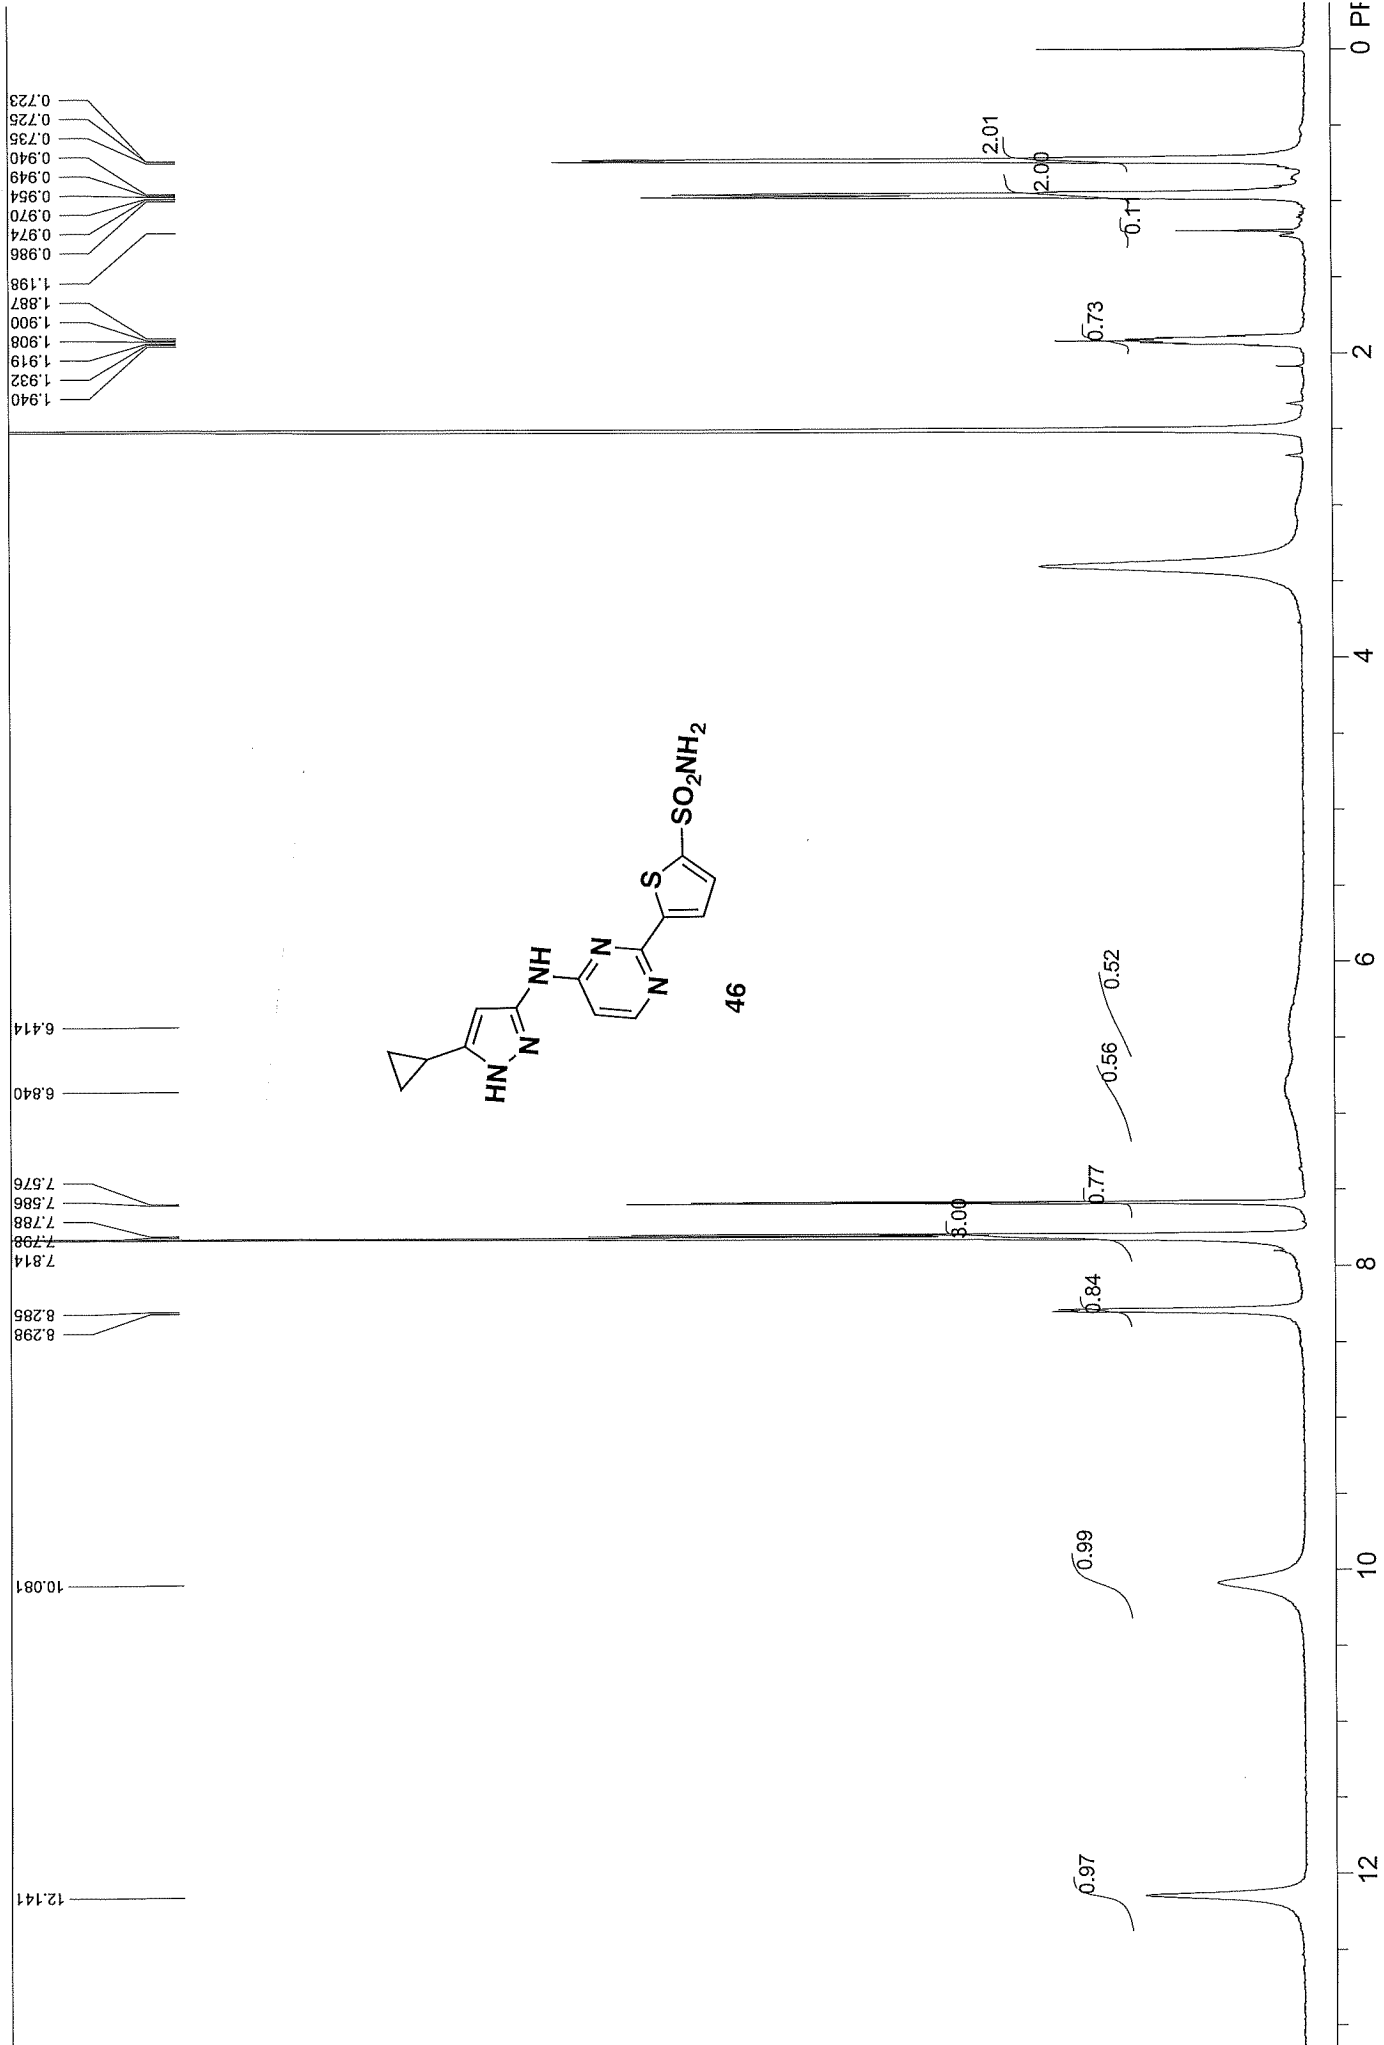

USER: nmr -- DATE: Mon Mar 03 08:37:10 2003  
 PTSId: 16384  
 OF1: 2607.5  
 NA: 8  
 LB: 0.0  
 PD: 1.0 sec  
 SW1: 8013  
 PW: 14.3 usec  
 WinNuts - Spda

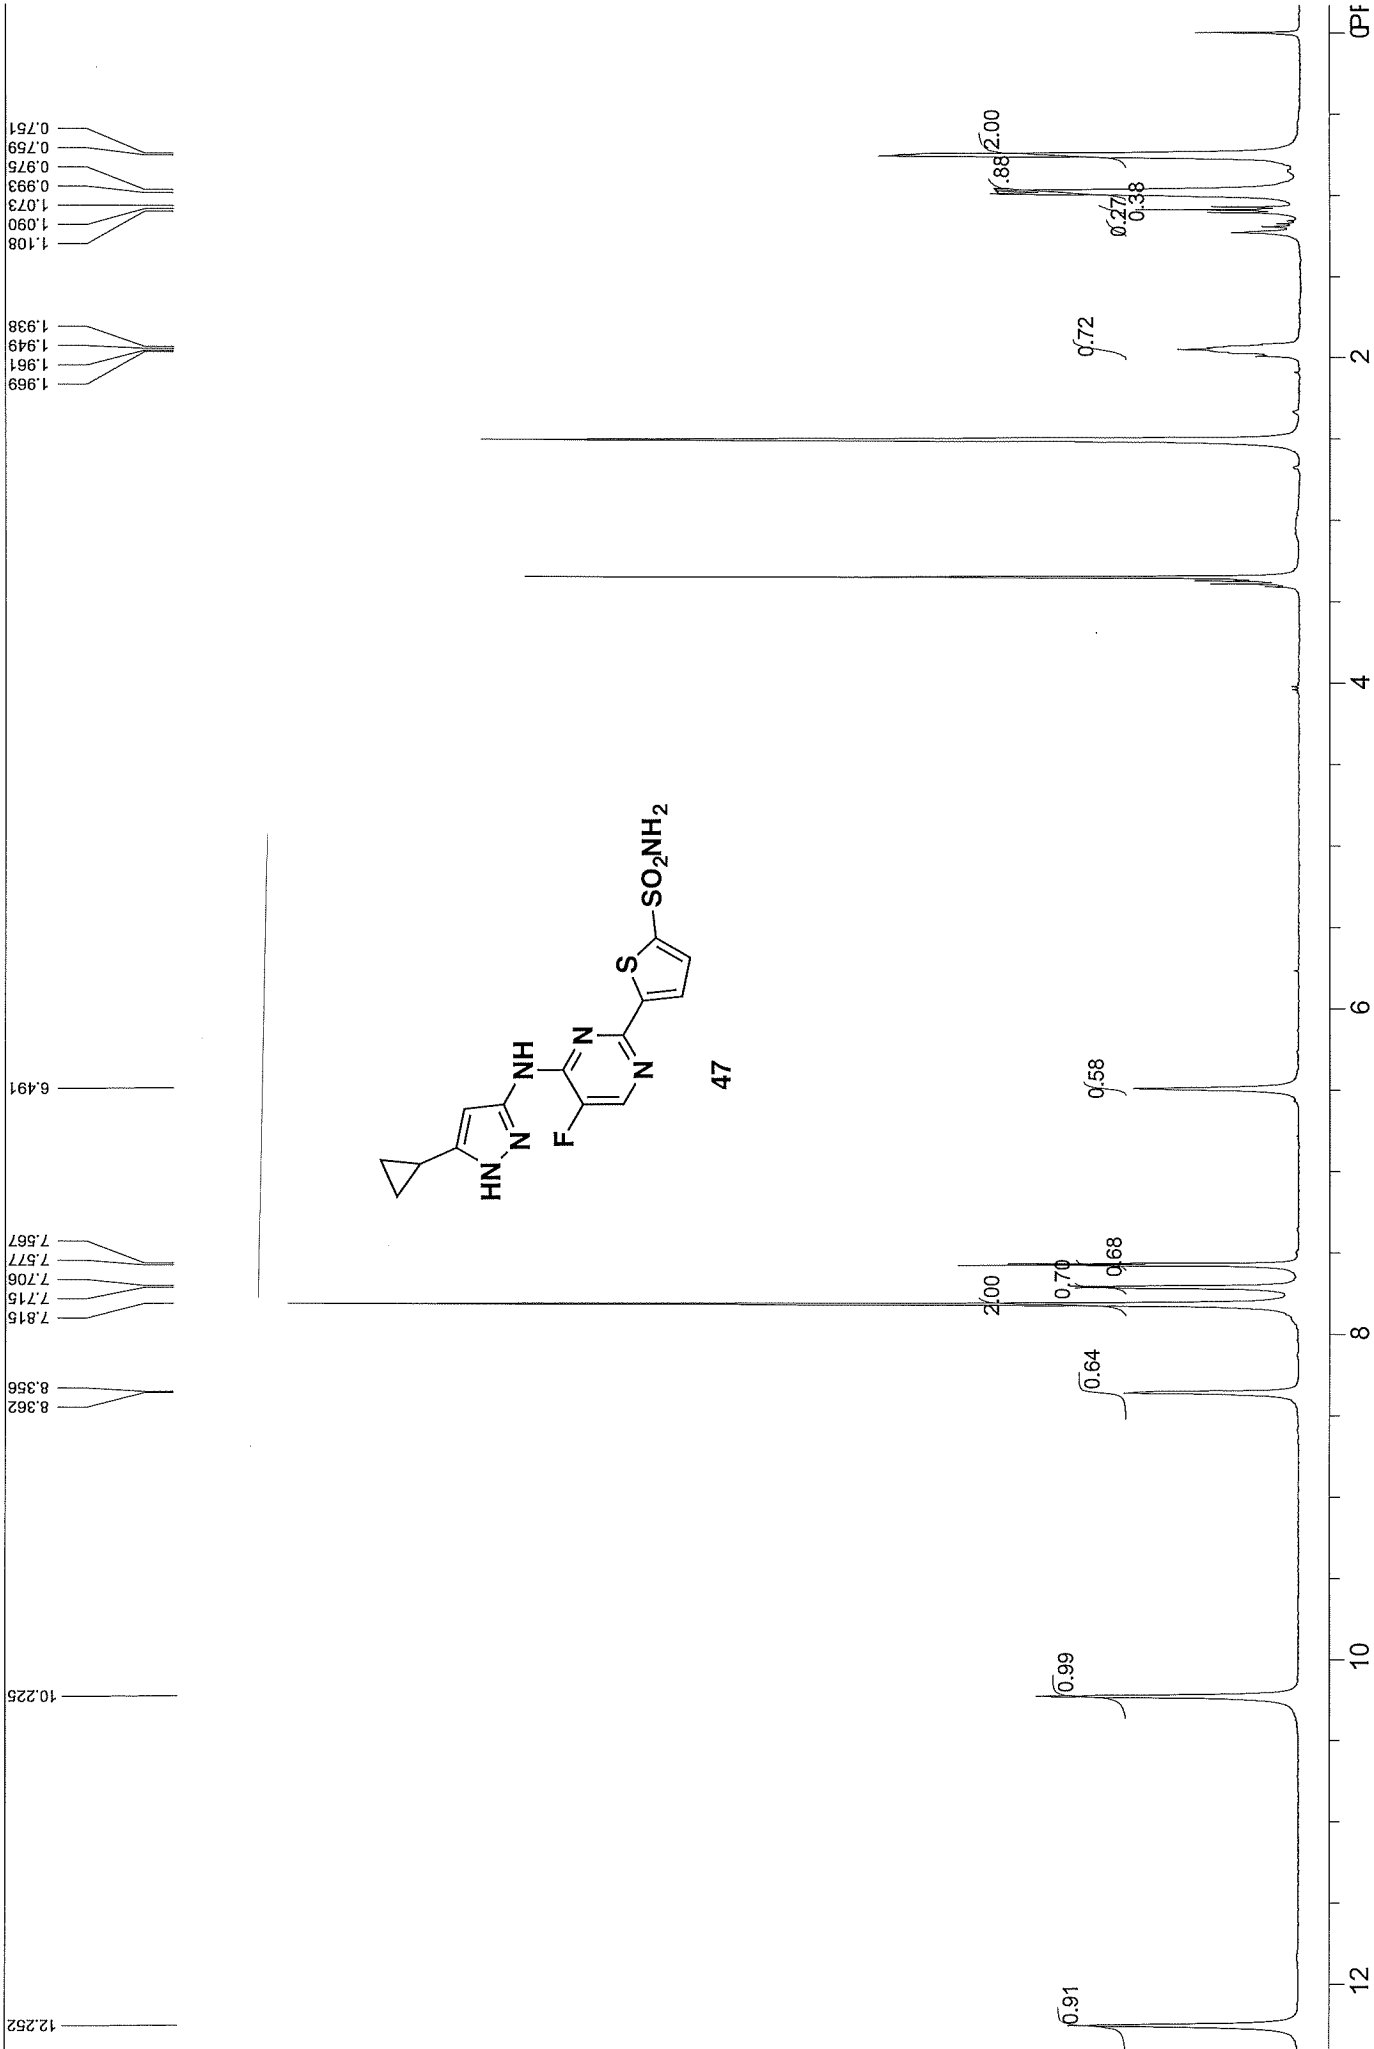

USER: nmr -- DATE: Mon Mar 03 08:32:11 2003

PTSId: 16384

OF1: 2607.3

PD: 1.0 sec

SW1: 8013

NA: 8

LB: 0.0

WinNuts - \$pda

z.g





1.980  
1.947  
1.913  
0.991  
0.986  
0.970  
0.965  
0.772  
0.761  
0.749

8.796  
8.516  
7.837  
7.812  
7.802  
7.602  
7.592  
6.435  
4.896

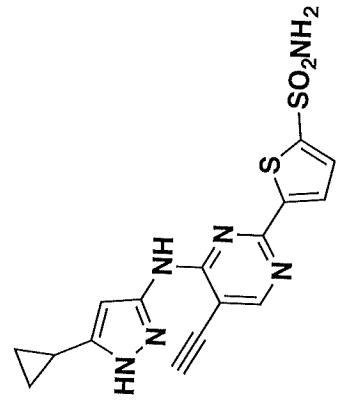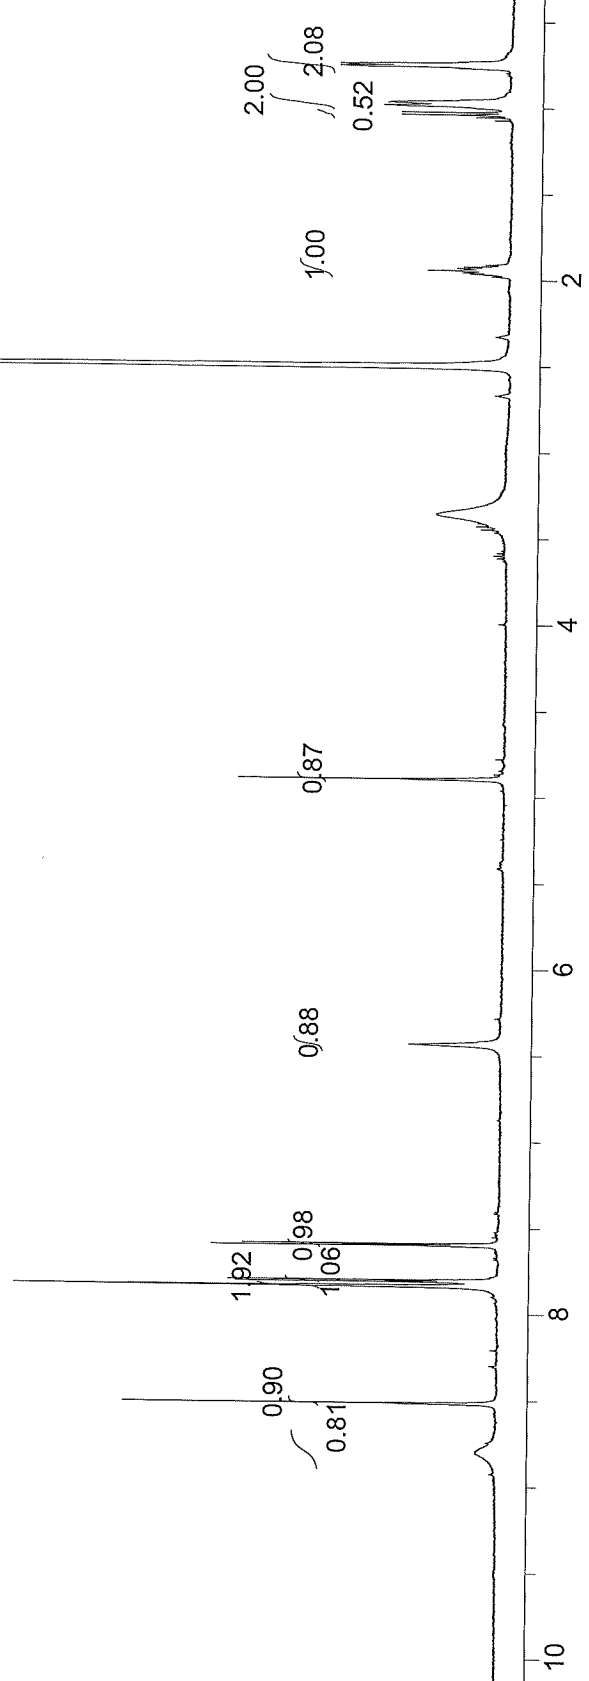

|           |               |             |                                        |
|-----------|---------------|-------------|----------------------------------------|
| F2: 1.000 | SW1: 8224     | OF1: 2475.2 | USER: nmr -- DATE: Mon Apr 21 08:57:51 |
|           | PW: 13.8 usec | NA: 8       | PTSId: 32768                           |
|           | PD: 1.0 sec   | LB: 0.0     |                                        |
|           |               |             | Nuts -                                 |



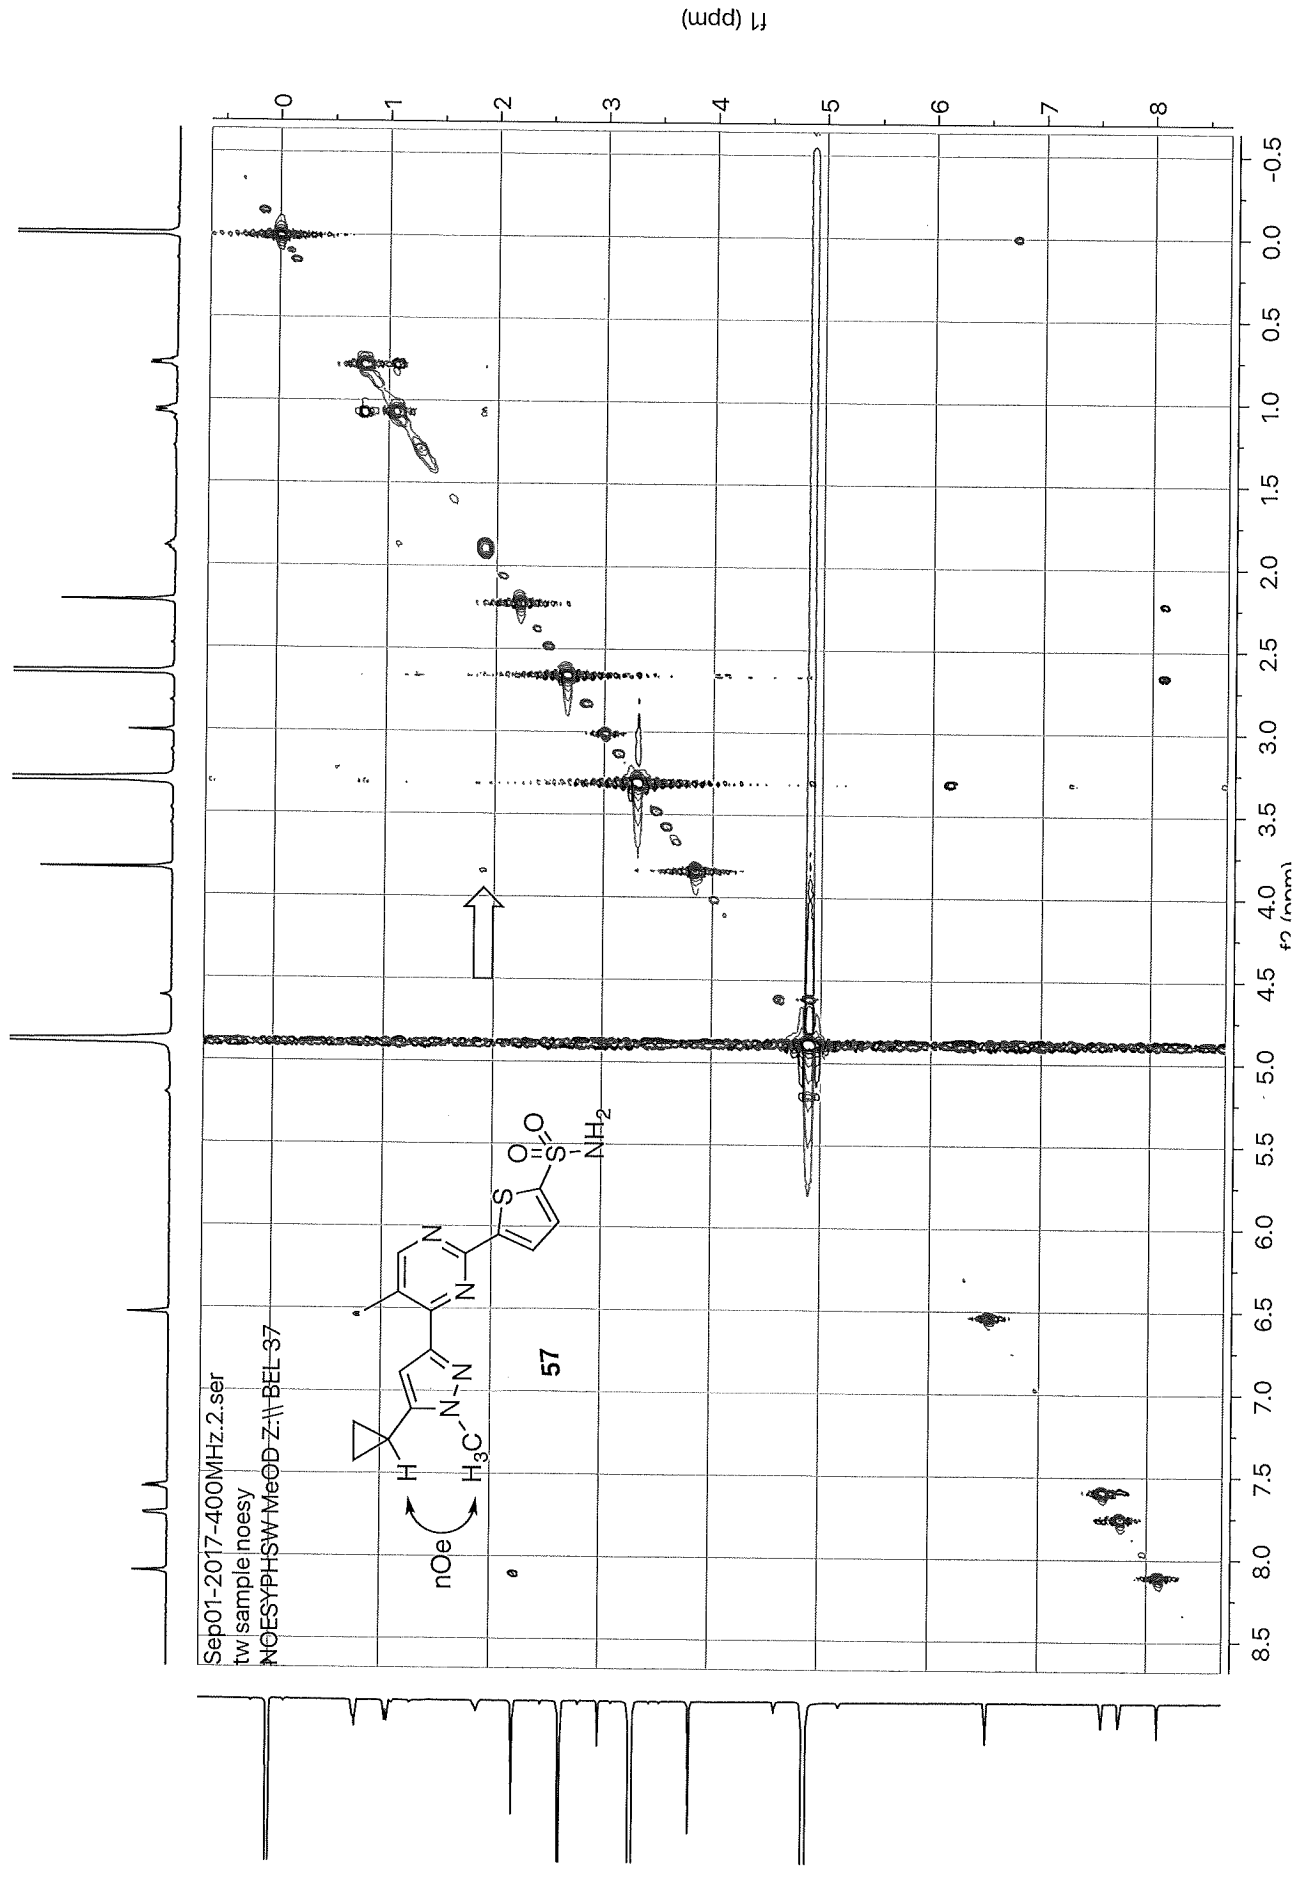

Sep01-2017-400MHz.2.ser  
 tw sample noesy  
 NOESYPHSW-MeOD Z:\BEL-37

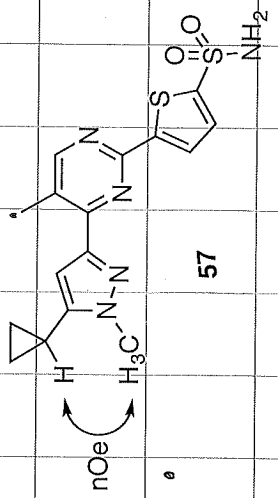

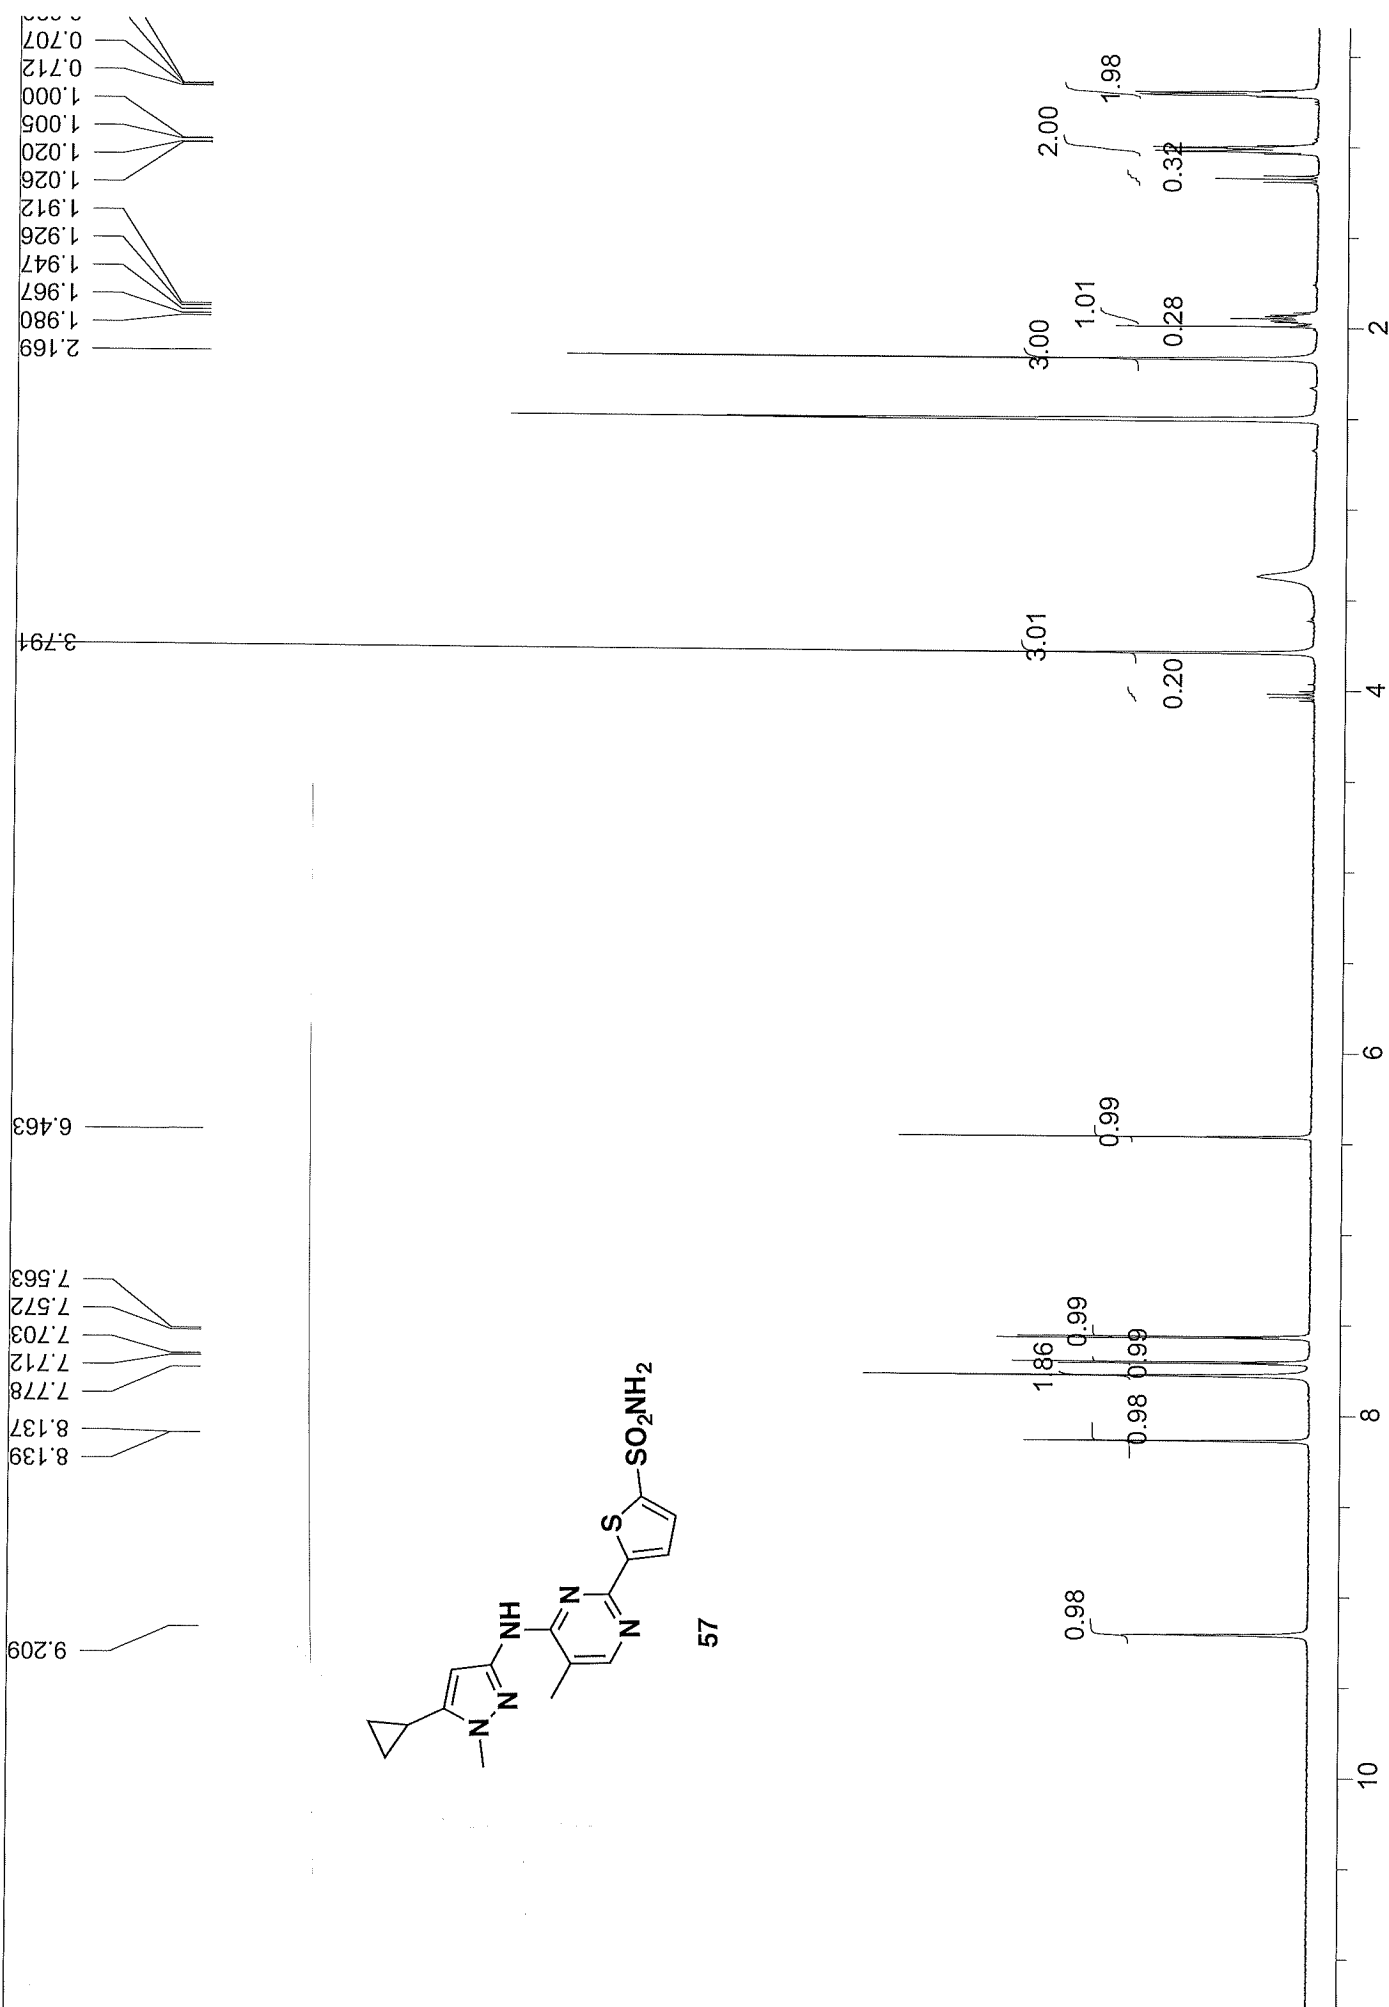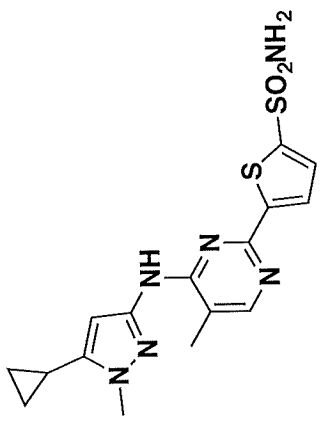

57

USER: nmr -- DATE: Mon Jun 02 07:56:41  
 PTS1d: 32768  
 OF1: 2475.4  
 NA: 8  
 LB: 0.0  
 SW1: 8224  
 PD: 1.0 sec  
 F2: 1.000  
 PW: 13.8 usec  
 Nuts -
